# Supplementary material for: A new preprocedural predictive risk model for post-endoscopic retrograde cholangiopancreatography pancreatitis: The SuPER model
Source: eLife. 2025 Jan 17;13:RP101604. doi: 10.7554/eLife.101604 (PMC11741517; doi:10.7554/eLife.101604)
Supplement: Source data 1. — The data was anonymized and deidentified. [file elife-101604-data1.xlsx]

## Sheet: Development cohort
Age	Age < 50	Sex	Female	Intravenous hydration	NSAID suppository	Protease inhibitors	Pancreatic cancer	IPMN	History of gastrectomy	History of gastrectomy	History of pancreatitis	History of PEP	Native papilla of Vater	Total bilirubin（mg/dl）	TB <= 1.2 mg/dl	Pancreatic carcification	Diameter of the MPD（mm）	Diameter of MPD > 3 mm	Periampullary diverticulum	EST	Precut sphincterotomy	EPBD	EPLBD	Biliary stone removal	Ampllectomy	Biiliary stent	Biliary stent above the papilla	Plastic stent	SEMS	CSEMS	Inadvertent pancreatic duct cannulation	Procedures on the puncreatic duct	Pancreatic stent	Prophylactic pancreatic stent	PEP	Mild PEP	Moderate PEP	Severe PEP	Female point	Native papilla of Vater point	Pancreatic calcification point	Procedures on the pancreatic duct point	IPMN point	Risk score	Risk classification
87	no	M	no	no	no	yes	no	no	no	no	no	no	no	1.23	no	yes	1.1	no	yes	no	no	no	yes	yes	no	no	no	no	no	no	no	no	no	no	no	no	no	no	0	0	-2	0	0	-2	low
67	no	M	no	no	no	no	no	no	no	no	no	no	no	0.3	yes	yes			no	no	no	no	no	yes	no	yes	no	yes	no	no	no	no	no	no	no	no	no	no	0	0	-2	0	0	-2	low
74	no	M	no	no	no	yes	no	no	no	no	no	yes	no	0.87	yes	yes	2.4	no	no	no	no	no	no	no	no	yes	no	yes	no	no	no	no	no	no	no	no	no	no	0	0	-2	0	0	-2	low
67	no	M	no	no	no	no	no	no	no	no	no	no	no	1.5	no	yes	3.4	yes	no	no	no	no	no	no	no	yes	yes	no	yes	no	no	no	no	no	no	no	no	no	0	0	-2	0	0	-2	low
58	no	M	no	no	no	no	yes	no	no	no	no	no	no	1	yes	yes			no	no	no	no	no	no	no	yes	no	no	yes	no	no	no	no	no	no	no	no	no	0	0	-2	0	0	-2	low
67	no	M	no	no	no	no	no	no	no	no	no	yes	no			yes			no	no	no	no	no	no	no	yes	no	yes	no	no	no	no	no	no	no	no	no	no	0	0	-2	0	0	-2	low
67	no	M	no	no	yes	no	no	no	no	no	no	yes	no	0.49	yes	yes	7.7	yes	no	no	no	no	no	no	no	yes	no	yes	no	no	no	no	no	no	no	no	no	no	0	0	-2	0	0	-2	low
85	no	M	no	no	no	no	no	no	no	no	no	no	no	1.9	no	yes	1.5	no	no	no	no	no	no	no	no	yes	no	no	yes	no	no	no	no	no	no	no	no	no	0	0	-2	0	0	-2	low
60	no	M	no	no	no	no	no	no	no	no	yes	no	no	0.8	yes	yes	4.5	yes	no	no	no	no	no	no	no	no	no	no	no	no	no	no	no	no	no	no	no	no	0	0	-2	0	0	-2	low
82	no	M	no	no	no	yes	no	no	no	no	no	no	no	1.57	no	yes	2.1	no	no	yes	no	no	yes	no	no	no	no	no	no	no	no	no	no	no	no	no	no	no	0	0	-2	0	0	-2	low
83	no	M	no	no	no	yes	no	no	no	no	no	no	no	1.08	yes	yes	2	no	no	no	no	no	no	no	no	yes	no	yes	no	no	no	no	no	no	no	no	no	no	0	0	-2	0	0	-2	low
73	no	M	no	no	no	no	no	no	no	no	no	no	no	0.86	yes	yes			yes	yes	no	no	no	yes	no	no	no	no	no	no	no	no	no	no	no	no	no	no	0	0	-2	0	0	-2	low
69	no	M	no	no	no	yes	no	no	no	no	no	no	no	0.6	yes	yes	2	no	yes	no	no	no	no	yes	no	no	no	no	no	no	no	no	no	no	no	no	no	no	0	0	-2	0	0	-2	low
74	no	M	no	no	no	yes	no	no	no	no	no	yes	no	3.4	no	yes	3.7	yes	no	no	no	no	no	no	no	yes	no	yes	no	no	no	no	no	no	no	no	no	no	0	0	-2	0	0	-2	low
70	no	M	no	no	no	yes	yes	no	no	no	no	no	no	1.6	no	yes	11.3	yes	yes	no	no	no	no	no	no	yes	no	no	yes	yes	no	no	no	no	no	no	no	no	0	0	-2	0	0	-2	low
76	no	M	no	no	no	yes	no	no	no	no	no	no	no	5.2	no	yes	0	no	no	yes	no	no	no	yes	no	no	no	no	no	no	no	no	no	no	no	no	no	no	0	0	-2	0	0	-2	low
88	no	M	no	no	no	yes	yes	no	no	no	no	no	no	4.1	no	yes	11.5	yes	yes	no	no	no	no	no	no	yes	no	yes	no	no	no	no	no	no	no	no	no	no	0	0	-2	0	0	-2	low
69	no	M	no	no	no	yes	no	no	no	no	no	no	no	0.5	yes	yes	2	no	no	no	no	no	no	no	no	yes	yes	yes	no	no	no	no	no	no	no	no	no	no	0	0	-2	0	0	-2	low
70	no	M	no	no	no	yes	no	no	no	no	no	no	no	0.5	yes	yes			no	no	no	no	no	no	no	yes	yes	yes	no	no	no	no	no	no	no	no	no	no	0	0	-2	0	0	-2	low
64	no	M	no	no	no	yes	no	no	no	no	no	no	no	1.2	yes	yes	1.2	no	no	no	no	no	no	no	no	yes	no	yes	no	no	no	no	no	no	no	no	no	no	0	0	-2	0	0	-2	low
64	no	M	no	no	no	yes	no	no	no	no	no	no	no	1	yes	yes	1.9	no	no	no	no	no	no	no	no	yes	no	yes	no	no	no	no	no	no	no	no	no	no	0	0	-2	0	0	-2	low
63	no	M	no	no	no	yes	no	no	no	no	no	no	no	1.3	no	yes			no	no	no	no	no	no	no	yes	no	yes	no	no	no	no	no	no	no	no	no	no	0	0	-2	0	0	-2	low
70	no	M	no	no	no	yes	no	no	no	no	no	no	no	0.5	yes	yes			no	no	no	no	no	no	no	yes	no	yes	no	no	no	no	no	no	no	no	no	no	0	0	-2	0	0	-2	low
71	no	M	no	no	no	yes	no	no	no	no	no	no	no	0.4	yes	yes	2.8	no	no	no	no	no	no	no	no	yes	no	yes	no	no	no	no	no	no	no	no	no	no	0	0	-2	0	0	-2	low
65	no	M	no	no	no	yes	no	no	no	no	no	no	no	2.1	no	yes	3.2	yes	no	no	no	no	no	no	no	yes	no	yes	no	no	no	no	no	no	no	no	no	no	0	0	-2	0	0	-2	low
65	no	M	no	no	no	yes	no	no	no	no	no	no	no	10.3	no	yes			no	no	no	no	no	no	no	yes	no	yes	no	no	no	no	no	no	no	no	no	no	0	0	-2	0	0	-2	low
84	no	M	no	yes	no	no	no	no	R-Y	yes	no	no	no	0.9	yes	yes	2.43	no	no	no	no	no	no	no	no	yes	no	yes	no	no	no	no	no	no	no	no	no	no	0	0	-2	0	0	-2	low
71	no	M	no	no	no	yes	no	no	R-Y	yes	no	no	no	1.3	no	yes	2.6	no	no	no	no	no	no	yes	no	no	no	no	no	no	no	no	no	no	no	no	no	no	0	0	-2	0	0	-2	low
87	no	M	no	no	no	no	no	no	B-I	yes	yes	no	no	1.4	no	yes	1	no	no	no	no	yes	no	yes	no	yes	no	yes	no	no	no	no	no	no	no	no	no	no	0	0	-2	0	0	-2	low
92	no	F	yes	yes	no	no	no	no	no	no	no	no	no	2.2	no	yes			no	no	no	no	no	yes	no	no	no	no	no	no	no	no	no	no	no	no	no	no	1	0	-2	0	0	-1	low
68	no	F	yes	no	no	yes	no	no	no	no	no	no	no	0.6	yes	yes	2.4	no	yes	no	no	no	no	yes	no	no	no	no	no	no	no	no	no	no	no	no	no	no	1	0	-2	0	0	-1	low
80	no	F	yes	no	no	yes	yes	no	no	no	no	no	no	1.9	no	yes	3.7	yes	no	no	no	no	no	no	no	yes	no	no	yes	yes	no	no	no	no	no	no	no	no	1	0	-2	0	0	-1	low
80	no	F	yes	no	no	no	yes	no	no	no	no	no	no	2.7	no	yes	8.1	yes	no	no	no	no	no	no	no	yes	no	no	yes	yes	no	no	no	no	no	no	no	no	1	0	-2	0	0	-1	low
58	no	F	yes	no	no	yes	no	no	no	no	no	no	no	0.31	yes	yes	5.3	yes	yes	no	no	no	no	no	no	yes	no	yes	no	no	no	no	no	no	no	no	no	no	1	0	-2	0	0	-1	low
86	no	F	yes	no	no	no	no	no	no	no	no	no	no	0.7	yes	yes	1.8	no	no	no	no	no	no	no	no	no	no	no	no	no	no	no	no	no	no	no	no	no	1	0	-2	0	0	-1	low
83	no	F	yes	no	no	no	no	no	no	no	no	no	no	0.6	yes	yes	1	no	yes	no	no	no	no	yes	no	yes	no	yes	no	no	no	no	no	no	no	no	no	no	1	0	-2	0	0	-1	low
61	no	F	yes	no	no	yes	yes	no	no	no	no	no	no	16.2	no	yes	6.1	yes	no	no	no	no	no	no	no	yes	no	no	yes	no	no	no	no	no	no	no	no	no	1	0	-2	0	0	-1	low
79	no	F	yes	no	no	yes	no	no	no	no	no	no	no	0.3	yes	yes	1.8	no	no	yes	no	no	yes	yes	no	no	no	no	no	no	no	no	no	no	no	no	no	no	1	0	-2	0	0	-1	low
73	no	M	no	no	no	yes	yes	no	B-I	yes	no	no	no	3.47	no	no	11	yes	no	no	no	no	no	no	no	yes	no	yes	no	no	no	no	no	no	no	no	no	no	0	0	0	0	0	0	low
86	no	M	no	no	no	no	no	no	B-I	yes	yes	no	no	1.1	yes	no			no	no	no	no	no	yes	no	no	no	no	no	no	no	no	no	no	no	no	no	no	0	0	0	0	0	0	low
90	no	M	no	no	no	yes	no	no	B-I	yes	no	no	no	2.4	no	no	1.3	no	no	no	no	no	no	yes	no	no	no	no	no	no	no	no	no	no	no	no	no	no	0	0	0	0	0	0	low
84	no	M	no	no	no	yes	no	no	B-I	yes	no	no	no	3.4	no	no	6.7	yes	no	no	no	no	no	no	no	yes	yes	no	yes	no	no	no	no	no	no	no	no	no	0	0	0	0	0	0	low
69	no	M	no	no	no	yes	no	no	B-I	yes	no	no	no	0.54	yes	no			no	no	no	no	no	no	no	no	no	no	no	no	no	no	no	no	no	no	no	no	0	0	0	0	0	0	low
75	no	M	no	no	no	yes	no	no	B-I	yes	no	no	no	1.4	no	no	4.9	yes	no	no	no	no	no	no	no	yes	no	yes	no	no	no	no	no	no	no	no	no	no	0	0	0	0	0	0	low
84	no	M	no	no	no	yes	no	no	B-I	yes	yes	no	no	1	yes	no	1.9	no	no	no	no	no	no	no	no	yes	no	yes	no	no	no	no	no	no	no	no	no	no	0	0	0	0	0	0	low
87	no	M	no	no	no	no	no	no	B-I	yes	no	no	yes	1.9	no	yes	1	no	no	yes	no	no	no	no	no	yes	no	yes	no	no	no	no	no	no	no	no	no	no	0	2	-2	0	0	0	low
91	no	M	no	no	no	no	no	no	B-II	yes	no	no	no	1.3	no	no	0	no	no	yes	no	no	no	yes	no	no	no	no	no	no	no	no	no	no	no	no	no	no	0	0	0	0	0	0	low
66	no	M	no	no	no	yes	no	no	B-II	yes	no	no	no	1.39	no	no	1.7	no	yes	no	no	no	no	yes	no	no	no	no	no	no	no	no	no	no	no	no	no	no	0	0	0	0	0	0	low
89	no	M	no	no	no	yes	no	no	B-II	yes	no	no	no	7.08	no	no	1.3	no	no	no	no	no	no	no	no	yes	no	yes	no	no	no	no	no	no	no	no	no	no	0	0	0	0	0	0	low
90	no	M	no	no	no	yes	no	no	B-II	yes	no	no	no	4.93	no	no	1.3	no	no	no	no	no	no	no	no	yes	no	yes	no	no	no	no	no	no	no	no	no	no	0	0	0	0	0	0	low
45	yes	M	no	no	no	yes	yes	no	B-II	yes	yes	yes	no	0.56	yes	no	4.5	yes	no	no	no	no	no	no	no	yes	no	yes	no	no	no	no	no	no	no	no	no	no	0	0	0	0	0	0	low
46	yes	M	no	no	no	yes	yes	no	B-II	yes	no	yes	no	2.4	no	no	2	no	no	no	no	no	no	no	no	no	no	no	no	no	no	no	no	no	no	no	no	no	0	0	0	0	0	0	low
85	no	M	no	no	no	no	no	no	B-II	yes	no	no	no	5.1	no	no	0.5	no	no	no	no	no	yes	yes	no	no	no	no	no	no	no	no	no	no	no	no	no	no	0	0	0	0	0	0	low
87	no	M	no	no	no	no	no	no	B-II	yes	no	no	no	7.7	no	no	1	no	no	no	no	no	no	yes	no	yes	no	yes	no	no	no	no	no	no	no	no	no	no	0	0	0	0	0	0	low
58	no	M	no	no	no	yes	no	no	B-II	yes	no	no	no	0.74	yes	no	5.4	yes	no	no	no	no	no	no	no	yes	no	yes	yes	no	no	no	no	no	no	no	no	no	0	0	0	0	0	0	low
58	no	M	no	no	no	yes	no	no	B-II	yes	no	no	no	3.79	no	no	7.7	yes	no	no	no	no	no	no	no	yes	no	yes	no	no	no	no	no	no	no	no	no	no	0	0	0	0	0	0	low
87	no	M	no	no	no	yes	no	no	B-II	yes	no	no	no	0.7	yes	no	3.6	yes	no	no	no	no	no	no	no	yes	no	yes	no	no	no	no	no	no	yes	yes	no	no	0	0	0	0	0	0	low
56	no	M	no	no	no	yes	no	no	B-II	yes	no	no	no	0.9	yes	no	2.6	no	no	yes	no	no	no	no	no	yes	no	yes	no	no	no	no	no	no	no	no	no	no	0	0	0	0	0	0	low
80	no	M	no	no	no	yes	no	no	Gastric tube	yes	no	no	no	0.23	yes	no	2	no	no	no	no	no	no	no	no	yes	no	no	no	no	no	no	no	no	no	no	no	no	0	0	0	0	0	0	low
69	no	M	no	no	no	no	no	no	no	no	no	no	no	2	no	no	2.3	no	yes	no	no	no	no	yes	no	no	no	no	no	no	no	no	no	no	no	no	no	no	0	0	0	0	0	0	low
79	no	M	no	no	no	yes	no	no	no	no	no	no	no	4.55	no	no	3.2	yes	no	no	no	no	no	no	no	yes	no	yes	no	no	no	no	no	no	no	no	no	no	0	0	0	0	0	0	low
69	no	M	no	no	no	no	no	no	no	no	no	no	no	1.3	no	no	1.9	no	yes	no	no	no	no	yes	no	no	no	no	no	no	no	no	no	no	no	no	no	no	0	0	0	0	0	0	low
74	no	M	no	no	no	yes	yes	no	no	no	no	no	no	9.2	no	no	4	yes	no	no	no	no	no	no	no	yes	no	no	no	no	no	no	no	no	no	no	no	no	0	0	0	0	0	0	low
64	no	M	no	no	no	yes	yes	no	no	no	no	no	no	0.56	yes	no	2.4	no	no	yes	no	no	no	no	no	yes	no	no	yes	yes	no	no	no	no	no	no	no	no	0	0	0	0	0	0	low
85	no	M	no	no	no	yes	no	no	no	no	no	no	no	1.21	no	no			no	no	no	no	no	yes	no	no	no	no	no	no	no	no	no	no	no	no	no	no	0	0	0	0	0	0	low
74	no	M	no	no	no	yes	yes	no	no	no	no	no	no	8.3	no	no	4	yes	no	no	no	no	no	no	no	yes	no	no	yes	no	no	no	no	no	no	no	no	no	0	0	0	0	0	0	low
79	no	M	no	no	no	yes	no	no	no	no	no	no	no	0.47	yes	no	2	no	no	no	no	no	yes	yes	no	no	no	no	no	no	no	no	no	no	no	no	no	no	0	0	0	0	0	0	low
73	no	M	no	no	no	no	no	no	no	no	no	no	no	1.5	no	no			no	yes	no	no	no	yes	no	no	no	no	no	no	no	no	no	no	no	no	no	no	0	0	0	0	0	0	low
72	no	M	no	no	no	yes	no	no	no	no	no	no	no	1.41	no	no	2	no	no	yes	no	no	no	yes	no	yes	no	no	no	no	no	no	no	no	no	no	no	no	0	0	0	0	0	0	low
76	no	M	no	no	no	yes	no	no	no	no	no	no	no	2.02	no	no	2	no	no	no	no	no	no	yes	no	yes	no	yes	no	no	no	no	no	no	no	no	no	no	0	0	0	0	0	0	low
89	no	M	no	no	no	yes	no	no	no	no	no	no	no	2.1	no	no	0.6	no	yes	no	no	no	no	no	no	yes	no	yes	no	no	no	no	no	no	no	no	no	no	0	0	0	0	0	0	low
76	no	M	no	no	no	yes	no	no	no	no	no	no	no	4.84	no	no	2	no	no	no	no	no	no	no	no	yes	no	no	no	no	no	no	no	no	no	no	no	no	0	0	0	0	0	0	low
71	no	M	no	no	no	no	no	no	no	no	no	no	no	0.7	yes	no			no	no	no	no	no	no	no	yes	no	yes	no	no	no	no	no	no	no	no	no	no	0	0	0	0	0	0	low
71	no	M	no	no	no	yes	yes	no	no	no	no	no	no	0.83	yes	no	5	yes	no	no	no	no	no	no	no	yes	no	yes	no	no	no	no	no	no	no	no	no	no	0	0	0	0	0	0	low
69	no	M	no	no	no	yes	no	no	no	no	no	no	no	1.38	no	no	3	no	no	no	no	no	no	no	no	yes	no	no	yes	yes	no	no	no	no	no	no	no	no	0	0	0	0	0	0	low
87	no	M	no	no	no	no	no	no	no	no	no	no	no	1.6	no	no	3	no	yes	no	no	no	no	no	no	yes	no	yes	no	no	no	no	no	no	no	no	no	no	0	0	0	0	0	0	low
87	no	M	no	no	no	no	no	no	no	no	no	no	no	1.1	yes	no			yes	no	no	no	no	no	no	yes	no	no	yes	no	no	no	no	no	yes	yes	no	no	0	0	0	0	0	0	low
88	no	M	no	no	no	no	no	no	no	no	no	no	no	0.8	yes	no	9.3	yes	no	no	no	no	no	no	no	yes	no	yes	no	no	no	no	no	no	no	no	no	no	0	0	0	0	0	0	low
69	no	M	no	no	no	yes	no	no	no	no	no	no	no	1.39	no	no	2.1	no	yes	no	no	no	no	yes	no	no	no	no	no	no	no	no	no	no	no	no	no	no	0	0	0	0	0	0	low
70	no	M	no	no	no	yes	no	no	no	no	no	no	no	3.62	no	no	2.1	no	yes	no	no	no	no	yes	no	no	no	no	no	no	no	no	no	no	no	no	no	no	0	0	0	0	0	0	low
87	no	M	no	no	no	yes	no	no	no	no	no	no	no	0.4	yes	no	2	no	no	no	no	no	no	yes	no	yes	no	no	no	no	no	no	no	no	no	no	no	no	0	0	0	0	0	0	low
70	no	M	no	no	no	yes	yes	no	no	no	no	no	no	3.49	no	no	2	no	no	no	no	no	no	no	no	no	no	no	no	no	no	no	no	no	no	no	no	no	0	0	0	0	0	0	low
59	no	M	no	no	no	yes	no	no	no	no	no	no	no	1.47	no	no			no	yes	no	no	no	yes	no	no	no	no	no	no	no	no	no	no	no	no	no	no	0	0	0	0	0	0	low
86	no	M	no	no	no	yes	no	no	no	no	no	no	no	1.33	no	no	2	no	no	no	no	no	no	yes	no	no	no	no	no	no	no	no	no	no	no	no	no	no	0	0	0	0	0	0	low
82	no	M	no	no	no	no	no	no	no	no	no	no	no	2.7	no	no	1	no	no	no	no	no	no	yes	no	yes	no	yes	no	no	no	no	no	no	no	no	no	no	0	0	0	0	0	0	low
88	no	M	no	no	no	yes	no	no	no	no	no	no	no	1.38	no	no	2.2	no	no	no	no	no	no	no	no	yes	no	yes	no	no	no	no	no	no	no	no	no	no	0	0	0	0	0	0	low
66	no	M	no	no	no	yes	no	no	no	no	yes	no	no	0.48	yes	no	1.9	no	no	yes	no	no	no	yes	no	no	no	no	no	no	no	no	no	no	no	no	no	no	0	0	0	0	0	0	low
79	no	M	no	no	no	yes	no	no	no	no	no	no	no	4.47	no	no	3.5	yes	no	yes	no	no	no	no	no	yes	no	no	no	no	no	no	no	no	no	no	no	no	0	0	0	0	0	0	low
84	no	M	no	no	no	yes	no	no	no	no	no	no	no	2.8	no	no	2.4	no	no	no	no	no	no	no	no	yes	no	yes	no	no	no	no	no	no	no	no	no	no	0	0	0	0	0	0	low
84	no	M	no	no	no	yes	no	no	no	no	no	no	no	3.5	no	no	2.4	no	no	yes	no	no	no	no	no	yes	no	no	yes	yes	no	no	no	no	no	no	no	no	0	0	0	0	0	0	low
72	no	M	no	no	no	yes	no	no	no	no	no	no	no	13.98	no	no	2.1	no	no	no	no	no	no	no	no	yes	yes	yes	no	no	no	no	no	no	no	no	no	no	0	0	0	0	0	0	low
72	no	M	no	no	no	yes	no	no	no	no	no	no	no	2.59	no	no	2.1	no	no	no	no	no	no	no	no	yes	yes	no	no	no	no	no	no	no	no	no	no	no	0	0	0	0	0	0	low
72	no	M	no	no	no	yes	no	no	no	no	no	no	no	9.6	no	no	2.1	no	no	no	no	no	no	no	no	yes	yes	yes	no	no	no	no	no	no	no	no	no	no	0	0	0	0	0	0	low
62	no	M	no	no	no	yes	no	no	no	no	no	no	no	1.25	no	no	2.9	no	no	no	no	no	no	yes	no	no	no	no	no	no	no	no	no	no	no	no	no	no	0	0	0	0	0	0	low
70	no	M	no	no	no	yes	no	no	no	no	no	no	no	5.04	no	no	2	no	yes	no	no	no	no	no	no	yes	no	yes	no	no	no	no	no	no	no	no	no	no	0	0	0	0	0	0	low
66	no	M	no	no	no	yes	no	no	no	no	yes	no	no	3.61	no	no			no	no	no	no	no	yes	no	yes	no	yes	no	no	no	no	no	no	no	no	no	no	0	0	0	0	0	0	low
85	no	M	no	no	no	no	no	no	no	no	no	no	no	3.8	no	no	0.5	no	no	no	no	no	yes	yes	no	no	no	no	no	no	no	no	no	no	no	no	no	no	0	0	0	0	0	0	low
65	no	M	no	no	no	no	no	no	no	no	no	no	no	1.7	no	no	1	no	no	no	no	no	no	no	no	yes	yes	yes	no	no	no	no	no	no	no	no	no	no	0	0	0	0	0	0	low
74	no	M	no	no	yes	no	no	no	no	no	no	no	no	6.2	no	no			yes	yes	no	no	no	yes	no	no	no	no	no	no	no	no	no	no	no	no	no	no	0	0	0	0	0	0	low
85	no	M	no	no	no	yes	no	no	no	no	no	no	no	2.72	no	no			yes	no	no	no	no	no	no	yes	no	yes	no	no	no	no	no	no	no	no	no	no	0	0	0	0	0	0	low
93	no	M	no	no	no	yes	no	no	no	no	no	no	no	1.82	no	no	3.2	yes	no	no	no	no	no	no	no	yes	yes	yes	no	no	no	no	no	no	no	no	no	no	0	0	0	0	0	0	low
85	no	M	no	no	no	yes	no	no	no	no	no	no	no	0.99	yes	no			yes	no	no	no	no	no	no	no	no	no	no	no	no	no	no	no	no	no	no	no	0	0	0	0	0	0	low
64	no	M	no	no	yes	no	no	no	no	no	no	no	no	37	no	no	0.5	no	no	yes	no	no	no	no	no	yes	no	yes	no	no	no	no	no	no	no	no	no	no	0	0	0	0	0	0	low
71	no	M	no	no	no	yes	yes	no	no	no	no	no	no	13.34	no	no	4.5	yes	no	no	no	no	no	no	no	yes	no	yes	no	no	no	no	no	no	no	no	no	no	0	0	0	0	0	0	low
71	no	M	no	no	no	yes	yes	no	no	no	no	no	no	5.88	no	no	4.5	yes	no	yes	no	no	no	no	no	yes	no	no	yes	yes	no	no	no	no	no	no	no	no	0	0	0	0	0	0	low
79	no	M	no	no	yes	no	no	no	no	no	no	no	no	4.8	no	no	0.5	no	no	yes	no	no	yes	yes	no	no	no	no	no	no	no	no	no	no	no	no	no	no	0	0	0	0	0	0	low
88	no	M	no	no	no	yes	no	no	no	no	no	no	no	3.71	no	no	1.5	no	no	no	no	no	no	no	no	yes	yes	yes	no	no	no	no	no	no	no	no	no	no	0	0	0	0	0	0	low
72	no	M	no	no	no	yes	yes	no	no	no	no	no	no	6.81	no	no			no	no	no	no	no	no	no	yes	no	yes	no	no	no	no	no	no	no	no	no	no	0	0	0	0	0	0	low
88	no	M	no	no	no	yes	no	no	no	no	no	no	no	0.58	yes	no	3.3	yes	no	no	no	no	no	no	no	yes	no	yes	no	no	no	no	no	no	no	no	no	no	0	0	0	0	0	0	low
72	no	M	no	no	no	no	no	no	no	no	no	no	no	0.9	yes	no	1.1	no	no	no	no	no	no	yes	no	no	no	no	no	no	no	no	no	no	no	no	no	no	0	0	0	0	0	0	low
92	no	M	no	no	no	yes	no	no	no	no	no	no	no	0.6	yes	no	0	no	no	no	no	no	no	no	no	yes	no	no	yes	no	no	no	no	no	no	no	no	no	0	0	0	0	0	0	low
69	no	M	no	no	no	yes	no	no	no	no	no	no	no	2.57	no	no	7.2	yes	no	no	no	no	no	no	no	no	no	no	yes	yes	no	no	no	no	no	no	no	no	0	0	0	0	0	0	low
72	no	M	no	no	no	no	no	no	no	no	no	no	no	2	no	no	1.1	no	no	no	no	no	no	yes	no	no	no	no	no	no	no	no	no	no	no	no	no	no	0	0	0	0	0	0	low
80	no	M	no	no	yes	no	no	no	no	no	no	no	no	0.6	yes	no	3.9	yes	no	yes	no	no	no	yes	no	no	no	no	no	no	no	no	no	no	no	no	no	no	0	0	0	0	0	0	low
85	no	M	no	no	no	yes	no	no	no	no	no	no	no	0.74	yes	no	0	no	no	no	no	no	no	yes	no	no	no	no	no	no	no	no	no	no	no	no	no	no	0	0	0	0	0	0	low
73	no	M	no	no	no	no	no	no	no	no	no	no	no	0.8	yes	no	2.2	no	no	no	no	no	no	yes	no	no	no	no	no	no	no	no	no	no	no	no	no	no	0	0	0	0	0	0	low
59	no	M	no	no	no	no	no	no	no	no	no	no	no	2.04	no	no	2.8	no	yes	yes	no	no	no	yes	no	no	no	no	no	no	no	no	no	no	no	no	no	no	0	0	0	0	0	0	low
64	no	M	no	no	no	no	no	no	no	no	no	no	no	3.2	no	no	0.5	no	no	no	no	no	no	no	no	yes	no	yes	no	no	no	no	no	no	no	no	no	no	0	0	0	0	0	0	low
67	no	M	no	no	yes	no	no	no	no	no	yes	no	no	1.6	no	no			no	yes	yes	no	no	no	no	yes	no	yes	no	no	no	no	no	no	no	no	no	no	0	0	0	0	0	0	low
81	no	M	no	no	no	no	no	no	no	no	no	no	no	1.1	yes	no			no	no	no	no	no	no	no	yes	no	no	yes	no	no	no	no	no	no	no	no	no	0	0	0	0	0	0	low
73	no	M	no	no	no	yes	no	no	no	no	no	no	no	1.06	yes	no	0	no	no	no	no	no	no	no	no	yes	no	yes	yes	no	no	no	no	no	no	no	no	no	0	0	0	0	0	0	low
70	no	M	no	no	no	no	no	no	no	no	no	no	no	0.6	yes	no			yes	no	no	no	no	no	no	yes	no	yes	no	no	no	no	no	no	no	no	no	no	0	0	0	0	0	0	low
63	no	M	no	no	no	no	no	no	no	no	no	no	no	4.59	no	no	2.1	no	yes	no	no	no	no	no	no	no	no	no	no	no	no	no	no	no	no	no	no	no	0	0	0	0	0	0	low
68	no	M	no	no	no	no	no	no	no	no	no	no	no	18.2	no	no	2.6	no	no	no	no	no	no	no	no	yes	no	yes	no	no	no	no	no	no	no	no	no	no	0	0	0	0	0	0	low
86	no	M	no	no	no	yes	no	no	no	no	no	no	no	6.34	no	no	1.1	no	yes	yes	no	no	no	no	no	yes	no	no	yes	no	no	no	no	no	no	no	no	no	0	0	0	0	0	0	low
76	no	M	no	no	no	no	no	no	no	no	no	no	no	0.9	yes	no	0.5	no	no	no	no	no	no	no	no	yes	no	yes	no	no	no	no	no	no	no	no	no	no	0	0	0	0	0	0	low
72	no	M	no	no	no	no	no	no	no	no	no	no	no	0.9	yes	no			no	no	no	no	no	no	no	yes	no	yes	no	no	no	no	no	no	no	no	no	no	0	0	0	0	0	0	low
87	no	M	no	no	no	no	no	no	no	no	no	no	no	0.7	yes	no			no	yes	no	no	no	yes	no	no	no	no	no	no	no	no	no	no	no	no	no	no	0	0	0	0	0	0	low
67	no	M	no	no	no	yes	no	no	no	no	no	no	no	0.98	yes	no	2.6	no	no	no	no	no	no	no	no	yes	no	no	yes	no	no	no	no	no	no	no	no	no	0	0	0	0	0	0	low
86	no	M	no	no	no	no	no	no	no	no	no	no	no	2	no	no	5.4	yes	no	no	no	no	no	no	no	no	no	no	no	no	no	no	no	no	no	no	no	no	0	0	0	0	0	0	low
68	no	M	no	no	no	yes	yes	no	no	no	no	no	no	1.11	yes	no	6.8	yes	no	no	no	no	no	no	no	yes	no	no	yes	no	no	no	no	no	no	no	no	no	0	0	0	0	0	0	low
64	no	M	no	no	no	no	no	no	no	no	no	no	no	1.1	yes	no	0.8	no	no	no	no	no	no	yes	no	no	no	no	no	no	no	no	no	no	yes	yes	no	no	0	0	0	0	0	0	low
91	no	M	no	no	no	yes	no	no	no	no	no	no	no	1.85	no	no	1	no	no	no	no	no	no	no	no	yes	no	no	no	no	no	no	no	no	no	no	no	no	0	0	0	0	0	0	low
78	no	M	no	no	no	yes	no	no	no	no	no	no	no	0.72	yes	no	13.6	yes	no	no	no	no	no	no	no	no	no	no	no	no	no	no	no	no	no	no	no	no	0	0	0	0	0	0	low
78	no	M	no	no	no	no	no	no	no	no	yes	no	no	1	yes	no	5.7	yes	no	no	no	no	no	yes	no	no	no	no	no	no	no	no	no	no	yes	yes	no	no	0	0	0	0	0	0	low
80	no	M	no	no	no	no	no	no	no	no	no	no	no	2.1	no	no			no	no	no	no	no	no	no	yes	no	yes	no	no	no	no	no	no	no	no	no	no	0	0	0	0	0	0	low
93	no	M	no	no	no	yes	no	no	no	no	no	no	no	0.75	yes	no			yes	no	no	no	no	yes	no	no	no	no	no	no	no	no	no	no	no	no	no	no	0	0	0	0	0	0	low
76	no	M	no	no	no	no	no	no	no	no	no	no	no	4.6	no	no	1	no	no	no	no	no	no	no	no	yes	no	yes	no	no	no	no	no	no	no	no	no	no	0	0	0	0	0	0	low
62	no	M	no	no	no	no	no	no	no	no	no	no	no	2.5	no	no			no	no	no	no	no	no	no	yes	no	no	yes	no	no	no	no	no	no	no	no	no	0	0	0	0	0	0	low
78	no	M	no	no	no	yes	no	no	no	no	no	no	no	12.19	no	no	1.7	no	no	no	no	no	no	no	no	yes	no	yes	no	no	no	no	no	no	no	no	no	no	0	0	0	0	0	0	low
73	no	M	no	no	no	no	no	no	no	no	no	no	no	0.7	yes	no	2.2	no	no	no	no	no	no	yes	no	no	no	no	no	no	no	no	no	no	no	no	no	no	0	0	0	0	0	0	low
88	no	M	no	no	no	yes	no	no	no	no	no	no	no	1.66	no	no			no	no	no	no	no	no	no	yes	yes	yes	no	no	no	no	no	no	no	no	no	no	0	0	0	0	0	0	low
82	no	M	no	no	no	no	no	no	no	no	no	no	no	1.6	no	no	1.1	no	no	no	no	no	no	yes	no	no	no	no	no	no	no	no	no	no	no	no	no	no	0	0	0	0	0	0	low
73	no	M	no	no	no	yes	no	no	no	no	no	no	no	8.14	no	no	3	no	no	no	no	no	no	no	no	yes	no	yes	no	no	no	no	no	no	no	no	no	no	0	0	0	0	0	0	low
74	no	M	no	no	no	yes	no	no	no	no	no	no	no	0.9	yes	no			no	no	no	no	no	no	no	yes	no	yes	no	no	no	no	no	no	no	no	no	no	0	0	0	0	0	0	low
73	no	M	no	no	no	yes	no	no	no	no	no	no	no	2.44	no	no	4.5	yes	no	no	no	no	no	yes	no	yes	no	yes	no	no	no	no	no	no	no	no	no	no	0	0	0	0	0	0	low
91	no	M	no	no	no	yes	no	no	no	no	no	no	no	1.6	no	no			no	no	no	no	no	yes	no	no	no	no	no	no	no	no	no	no	no	no	no	no	0	0	0	0	0	0	low
73	no	M	no	no	no	yes	no	no	no	no	no	no	no	0.54	yes	no	4.5	yes	no	no	no	no	no	no	no	yes	no	no	yes	yes	no	no	no	no	no	no	no	no	0	0	0	0	0	0	low
74	no	M	no	no	no	yes	no	no	no	no	no	no	no	0.5	yes	no	4.2	yes	no	no	no	no	no	no	no	yes	no	yes	no	no	no	no	no	no	no	no	no	no	0	0	0	0	0	0	low
74	no	M	no	no	no	no	no	no	no	no	no	no	no	1.54	no	no	3.9	yes	no	no	no	no	no	no	no	yes	no	no	yes	yes	no	no	no	no	no	no	no	no	0	0	0	0	0	0	low
85	no	M	no	no	no	no	no	no	no	no	no	no	no	1.19	yes	no	1.3	no	no	no	no	no	no	yes	no	no	no	no	no	no	no	no	no	no	no	no	no	no	0	0	0	0	0	0	low
90	no	M	no	no	no	no	no	no	no	no	no	no	no	0.97	yes	no	2.5	no	no	yes	no	no	no	no	no	yes	no	no	yes	yes	no	no	no	no	no	no	no	no	0	0	0	0	0	0	low
75	no	M	no	no	no	yes	no	no	no	no	no	yes	no	2.55	no	no	2.5	no	yes	no	no	no	no	no	no	yes	no	yes	no	no	no	no	no	no	no	no	no	no	0	0	0	0	0	0	low
75	no	M	no	no	no	yes	no	no	no	no	no	yes	no	3.31	no	no	2.5	no	yes	no	no	no	no	no	no	yes	no	yes	no	no	no	no	no	no	no	no	no	no	0	0	0	0	0	0	low
72	no	M	no	no	no	yes	no	no	no	no	no	no	no	20.07	no	no			no	no	no	no	no	no	no	yes	no	yes	no	no	no	no	no	no	no	no	no	no	0	0	0	0	0	0	low
72	no	M	no	no	no	yes	no	no	no	no	no	no	no	23.01	no	no			no	no	no	no	no	no	no	yes	no	no	no	no	no	no	no	no	no	no	no	no	0	0	0	0	0	0	low
85	no	M	no	no	no	yes	no	no	no	no	no	no	no	1.5	no	no	1.7	no	no	no	no	no	no	no	no	yes	no	no	yes	no	no	no	no	no	no	no	no	no	0	0	0	0	0	0	low
85	no	M	no	no	no	yes	no	no	no	no	no	no	no	0.7	yes	no	1.4	no	no	no	no	no	no	no	no	yes	no	yes	no	no	no	no	no	no	no	no	no	no	0	0	0	0	0	0	low
71	no	M	no	no	no	yes	no	no	no	no	no	no	no	5.95	no	no	1.5	no	yes	no	no	no	no	no	no	yes	no	yes	no	no	no	no	no	no	no	no	no	no	0	0	0	0	0	0	low
71	no	M	no	no	no	yes	no	no	no	no	no	no	no	5.17	no	no	1.5	no	yes	no	no	no	no	no	no	yes	yes	no	no	no	no	no	no	no	no	no	no	no	0	0	0	0	0	0	low
67	no	M	no	no	no	yes	no	no	no	no	no	no	no	2	no	no	1.1	no	yes	no	no	no	no	no	no	yes	no	yes	no	no	no	no	no	no	no	no	no	no	0	0	0	0	0	0	low
69	no	M	no	no	no	yes	no	no	no	no	no	no	no	22.2	no	no	1.7	no	no	no	no	no	no	no	no	yes	no	yes	no	no	no	no	no	no	no	no	no	no	0	0	0	0	0	0	low
84	no	M	no	no	no	no	no	no	no	no	no	no	no	2.5	no	no	1.1	no	no	no	no	no	no	no	no	yes	no	no	yes	no	no	no	no	no	no	no	no	no	0	0	0	0	0	0	low
68	no	M	no	no	no	yes	no	no	no	no	no	no	no	0.9	yes	no	1.2	no	yes	no	no	no	no	no	no	no	no	no	no	no	no	no	no	no	no	no	no	no	0	0	0	0	0	0	low
70	no	M	no	no	no	yes	no	no	no	no	no	no	no	1.39	no	no			yes	no	no	no	no	no	no	no	no	no	no	no	no	no	no	no	no	no	no	no	0	0	0	0	0	0	low
63	no	M	no	no	no	no	no	no	no	no	no	no	no	11.83	no	no	1.5	no	no	no	no	no	no	yes	no	yes	no	yes	yes	no	no	no	no	no	no	no	no	no	0	0	0	0	0	0	low
76	no	M	no	no	no	yes	no	no	no	no	no	no	no	0.6	yes	no	3.1	yes	no	no	no	no	no	yes	no	no	no	no	no	no	no	no	no	no	no	no	no	no	0	0	0	0	0	0	low
79	no	M	no	no	no	yes	no	no	no	no	no	no	no	0.26	yes	no			no	no	no	no	no	yes	no	no	no	no	no	no	no	no	no	no	no	no	no	no	0	0	0	0	0	0	low
68	no	M	no	no	no	yes	no	no	no	no	no	no	no	1	yes	no	1.49	no	no	no	no	no	no	no	no	yes	no	yes	no	no	no	no	no	no	no	no	no	no	0	0	0	0	0	0	low
88	no	M	no	no	no	no	yes	no	no	no	no	no	no	0.85	yes	no			no	no	no	no	no	no	no	yes	no	no	yes	yes	no	no	no	no	no	no	no	no	0	0	0	0	0	0	low
69	no	M	no	no	no	yes	no	no	no	no	no	no	no	0.7	yes	no	1.7	no	yes	no	no	no	no	no	no	no	no	no	no	no	no	no	no	no	no	no	no	no	0	0	0	0	0	0	low
63	no	M	no	no	no	no	no	no	no	no	no	no	no	3.1	no	no	0	no	yes	no	no	no	no	no	no	yes	no	no	no	no	no	no	no	no	no	no	no	no	0	0	0	0	0	0	low
68	no	M	no	no	no	yes	no	no	no	no	no	no	no	3.1	no	no	1.49	no	no	no	no	no	no	no	no	yes	no	yes	no	no	no	no	no	no	no	no	no	no	0	0	0	0	0	0	low
70	no	M	no	no	no	no	yes	no	no	no	no	no	no	2.1	no	no	1	no	no	no	no	no	no	no	no	no	no	no	yes	yes	no	no	no	no	no	no	no	no	0	0	0	0	0	0	low
69	no	M	no	no	no	yes	no	no	no	no	no	yes	no	0.7	yes	no	3.7	yes	no	no	no	no	no	no	no	yes	no	yes	no	no	no	no	no	no	no	no	no	no	0	0	0	0	0	0	low
78	no	M	no	no	no	yes	no	no	no	no	no	no	no	0.8	yes	no	1.4	no	no	no	no	no	no	yes	no	no	no	no	no	no	no	no	no	no	no	no	no	no	0	0	0	0	0	0	low
82	no	M	no	no	no	yes	no	no	no	no	no	no	no	0.45	yes	no			no	no	no	no	no	no	no	yes	no	yes	no	no	no	no	no	no	no	no	no	no	0	0	0	0	0	0	low
82	no	M	no	no	no	yes	no	no	no	no	no	no	no	0.4	yes	no			no	no	no	no	no	no	no	yes	no	yes	no	no	no	no	no	no	no	no	no	no	0	0	0	0	0	0	low
83	no	M	no	no	no	yes	no	no	no	no	no	no	no	1.53	no	no			no	no	no	no	no	yes	no	yes	no	yes	no	no	no	no	no	no	no	no	no	no	0	0	0	0	0	0	low
83	no	M	no	no	no	yes	no	no	no	no	no	no	no	2.43	no	no	2.2	no	no	no	no	no	no	no	no	yes	no	yes	no	no	no	no	no	no	no	no	no	no	0	0	0	0	0	0	low
87	no	M	no	no	no	yes	no	no	no	no	no	yes	no	1.4	no	no			no	no	no	no	no	no	no	yes	yes	no	yes	yes	no	no	no	no	no	no	no	no	0	0	0	0	0	0	low
87	no	M	no	no	no	yes	no	no	no	no	no	yes	no	1.2	yes	no			no	no	no	no	no	no	no	yes	no	no	no	no	no	no	no	no	no	no	no	no	0	0	0	0	0	0	low
71	no	M	no	no	no	yes	no	no	no	no	no	no	no	0.42	yes	no			no	no	no	no	no	no	no	no	no	no	no	no	no	no	no	no	no	no	no	no	0	0	0	0	0	0	low
87	no	M	no	no	no	yes	no	no	no	no	no	yes	no	1.9	no	no			no	no	no	no	no	no	no	yes	no	yes	no	no	no	no	no	no	no	no	no	no	0	0	0	0	0	0	low
72	no	M	no	no	no	yes	no	no	no	no	no	no	no	1.88	no	no	1.9	no	no	no	no	no	no	no	no	yes	no	yes	no	no	no	no	no	no	no	no	no	no	0	0	0	0	0	0	low
92	no	M	no	no	no	no	no	no	no	no	no	no	no	2.3	no	no	2.8	no	yes	no	no	no	no	no	no	yes	no	no	yes	no	no	no	no	no	no	no	no	no	0	0	0	0	0	0	low
87	no	M	no	no	no	yes	no	no	no	no	no	no	no	0.6	yes	no	1.3	no	no	no	no	no	no	no	no	yes	no	yes	no	no	no	no	no	no	no	no	no	no	0	0	0	0	0	0	low
86	no	M	no	no	no	yes	no	no	no	no	no	no	no	0.6	yes	no	2.3	no	no	no	no	no	no	no	no	yes	no	yes	no	no	no	no	no	no	no	no	no	no	0	0	0	0	0	0	low
80	no	M	no	no	no	yes	no	no	no	no	no	no	no	2.3	no	no			no	no	no	no	no	yes	no	no	no	no	no	no	no	no	no	no	no	no	no	no	0	0	0	0	0	0	low
75	no	M	no	no	no	yes	no	no	no	no	no	no	no	0.9	yes	no	2.1	no	yes	no	no	no	yes	yes	no	no	no	no	no	no	no	no	no	no	no	no	no	no	0	0	0	0	0	0	low
81	no	M	no	no	no	yes	yes	no	no	no	no	no	no	10.4	no	no			no	no	no	no	no	no	no	yes	no	no	yes	no	no	no	no	no	no	no	no	no	0	0	0	0	0	0	low
82	no	M	no	no	no	yes	no	no	no	no	no	no	no	1.1	yes	no	2.2	no	no	no	no	no	no	no	no	yes	no	yes	no	no	no	no	no	no	no	no	no	no	0	0	0	0	0	0	low
89	no	M	no	no	no	yes	no	no	no	no	no	no	no	4.7	no	no			no	no	no	no	no	no	no	yes	no	no	yes	no	no	no	no	no	no	no	no	no	0	0	0	0	0	0	low
76	no	M	no	no	no	yes	no	no	no	no	no	no	no	1.3	no	no	2.1	no	no	no	no	no	no	no	no	yes	no	yes	no	no	no	no	no	no	no	no	no	no	0	0	0	0	0	0	low
79	no	M	no	no	no	yes	yes	no	no	no	no	no	no	0.8	yes	no	0	no	no	no	no	no	no	no	no	yes	no	yes	no	no	no	no	no	no	no	no	no	no	0	0	0	0	0	0	low
79	no	M	no	no	no	yes	yes	no	no	no	no	no	no	0.6	yes	no	0	no	no	no	no	no	no	no	no	yes	no	yes	no	no	no	no	no	no	no	no	no	no	0	0	0	0	0	0	low
79	no	M	no	no	no	yes	yes	no	no	no	no	no	no	0.5	yes	no	0	no	no	no	no	no	no	no	no	yes	no	yes	no	no	no	no	no	no	no	no	no	no	0	0	0	0	0	0	low
80	no	M	no	no	no	yes	yes	no	no	no	no	no	no	0.8	yes	no	0	no	no	no	no	no	no	no	no	yes	no	yes	no	no	no	no	no	no	no	no	no	no	0	0	0	0	0	0	low
79	no	M	no	no	no	yes	yes	no	no	no	no	no	no	0.3	yes	no	0	no	no	no	no	no	no	no	no	yes	no	yes	no	no	no	no	no	no	no	no	no	no	0	0	0	0	0	0	low
63	no	M	no	no	no	yes	yes	no	no	no	no	no	no	1.8	no	no	0	no	no	no	no	no	no	no	no	yes	no	yes	no	no	no	no	no	no	no	no	no	no	0	0	0	0	0	0	low
82	no	M	no	no	no	yes	no	no	no	no	no	no	no	3.4	no	no	3	no	yes	no	no	no	no	no	no	yes	no	no	yes	no	no	no	no	no	no	no	no	no	0	0	0	0	0	0	low
75	no	M	no	no	no	yes	yes	no	no	no	no	no	no	6.2	no	no	0	no	no	no	no	no	no	no	no	yes	no	yes	no	no	no	no	no	no	no	no	no	no	0	0	0	0	0	0	low
73	no	M	no	no	no	yes	no	no	no	no	no	no	no	1.6	no	no	0.8	no	no	no	no	no	no	no	no	yes	yes	no	yes	no	no	no	no	no	no	no	no	no	0	0	0	0	0	0	low
73	no	M	no	no	no	yes	no	no	no	no	no	no	no	1	yes	no	2.5	no	no	no	no	no	no	no	no	yes	no	yes	no	no	no	no	no	no	no	no	no	no	0	0	0	0	0	0	low
72	no	M	no	no	no	yes	no	no	no	no	no	no	no	4.1	no	no			no	no	no	no	no	no	no	yes	no	yes	no	no	no	no	no	no	no	no	no	no	0	0	0	0	0	0	low
72	no	M	no	no	no	yes	no	no	no	no	no	no	no	1.7	no	no			no	no	no	no	no	yes	no	yes	no	yes	no	no	no	no	no	no	no	no	no	no	0	0	0	0	0	0	low
73	no	M	no	no	no	yes	no	no	no	no	no	no	no	1.8	no	no	1.2	no	no	no	no	no	no	no	no	yes	no	yes	no	no	no	no	no	no	no	no	no	no	0	0	0	0	0	0	low
78	no	M	no	no	no	yes	no	no	no	no	no	no	no	1.6	no	no	1.6	no	no	no	no	no	no	no	no	yes	no	yes	no	no	no	no	no	no	no	no	no	no	0	0	0	0	0	0	low
80	no	M	no	no	no	yes	yes	no	no	no	no	no	no	1.1	yes	no	1	no	yes	no	no	no	no	no	no	yes	no	yes	no	no	no	no	no	no	no	no	no	no	0	0	0	0	0	0	low
63	no	M	no	no	no	yes	no	no	no	no	no	no	no	4.7	no	no	2.5	no	yes	no	no	no	no	yes	no	no	no	no	no	no	no	no	no	no	no	no	no	no	0	0	0	0	0	0	low
83	no	M	no	no	no	yes	no	no	no	no	no	yes	no	1.2	yes	no	1	no	no	no	no	no	no	no	no	yes	no	yes	no	no	no	no	no	no	no	no	no	no	0	0	0	0	0	0	low
83	no	M	no	no	no	yes	no	no	no	no	no	yes	no	2.8	no	no	1	no	no	no	no	no	no	no	no	yes	no	yes	no	no	no	no	no	no	no	no	no	no	0	0	0	0	0	0	low
84	no	M	no	no	no	yes	no	no	no	no	no	no	no	0.7	yes	no			no	no	no	no	no	no	no	yes	no	yes	no	no	no	no	no	no	no	no	no	no	0	0	0	0	0	0	low
67	no	M	no	no	no	yes	yes	no	no	no	no	no	no	8.3	no	no	4.6	yes	no	no	no	no	no	no	no	yes	no	no	yes	no	no	no	no	no	no	no	no	no	0	0	0	0	0	0	low
61	no	M	no	no	no	yes	no	no	no	no	no	no	no	0.8	yes	no			no	no	no	no	no	yes	no	yes	no	yes	no	no	no	no	no	no	no	no	no	no	0	0	0	0	0	0	low
58	no	M	no	no	no	yes	yes	no	no	no	no	no	no	1.3	no	no	10.5	yes	no	no	no	no	no	no	no	yes	no	no	yes	no	no	no	no	no	no	no	no	no	0	0	0	0	0	0	low
58	no	M	no	no	no	yes	yes	no	no	no	no	no	no	3.6	no	no	12.3	yes	no	no	no	no	no	no	no	yes	no	yes	no	no	no	no	no	no	no	no	no	no	0	0	0	0	0	0	low
77	no	M	no	no	no	yes	no	no	no	no	no	no	no	0.9	yes	no	7.8	yes	no	no	no	no	no	no	no	yes	no	yes	no	no	no	no	no	no	no	no	no	no	0	0	0	0	0	0	low
68	no	M	no	no	no	yes	no	no	no	no	no	no	no	1.6	no	no	1.5	no	no	no	no	no	no	no	no	yes	no	yes	no	no	no	no	no	no	no	no	no	no	0	0	0	0	0	0	low
72	no	M	no	no	no	yes	yes	no	no	no	no	no	no	0.5	yes	no	4.6	yes	no	no	no	no	no	no	no	yes	no	no	yes	no	no	no	no	no	no	no	no	no	0	0	0	0	0	0	low
72	no	M	no	no	no	yes	no	no	no	no	no	no	no	2.8	no	no			no	no	no	no	no	no	no	yes	no	yes	no	no	no	no	no	no	no	no	no	no	0	0	0	0	0	0	low
72	no	M	no	no	no	yes	no	no	no	no	no	no	no	2.5	no	no			no	no	no	no	no	yes	no	no	no	no	no	no	no	no	no	no	no	no	no	no	0	0	0	0	0	0	low
71	no	M	no	no	no	yes	no	no	no	no	no	no	no	2.9	no	no	2	no	no	no	no	no	no	yes	no	yes	yes	yes	no	no	no	no	no	no	no	no	no	no	0	0	0	0	0	0	low
71	no	M	no	no	no	yes	no	no	no	no	no	no	no	3.6	no	no			no	no	no	no	no	yes	no	yes	no	yes	no	no	no	no	no	no	no	no	no	no	0	0	0	0	0	0	low
71	no	M	no	no	no	yes	no	no	no	no	no	no	no	2.6	no	no			no	no	no	no	no	yes	no	yes	no	yes	no	no	no	no	no	no	no	no	no	no	0	0	0	0	0	0	low
62	no	M	no	no	no	no	no	no	no	no	no	no	no	18.3	no	no	1	no	no	yes	no	no	no	yes	no	no	no	no	no	no	no	no	no	no	no	no	no	no	0	0	0	0	0	0	low
88	no	M	no	no	no	yes	no	no	no	no	no	no	no	3.6	no	no			no	yes	no	no	no	yes	no	no	no	no	no	no	no	no	no	no	no	no	no	no	0	0	0	0	0	0	low
82	no	M	no	no	no	yes	no	no	no	no	no	no	no	1.4	no	no	1	no	no	no	no	no	no	no	no	yes	no	yes	no	no	no	no	no	no	no	no	no	no	0	0	0	0	0	0	low
82	no	M	no	no	no	yes	no	no	no	no	no	no	no	1.3	no	no	1.6	no	no	no	no	no	no	no	no	yes	yes	no	yes	no	no	no	no	no	no	no	no	no	0	0	0	0	0	0	low
63	no	M	no	no	no	yes	no	no	no	no	no	no	no	8	no	no	3.3	yes	yes	no	no	no	no	no	no	yes	no	yes	no	no	no	no	no	no	no	no	no	no	0	0	0	0	0	0	low
63	no	M	no	no	no	yes	no	no	no	no	no	no	no	1.5	no	no	3.5	yes	no	yes	no	no	yes	yes	no	yes	no	yes	no	no	no	no	no	no	no	no	no	no	0	0	0	0	0	0	low
63	no	M	no	no	no	yes	no	no	no	no	no	no	no			no			no	yes	no	no	yes	no	no	no	no	no	no	no	no	no	no	no	no	no	no	no	0	0	0	0	0	0	low
52	no	M	no	no	no	yes	no	no	no	no	no	no	no	1	yes	no	1	no	no	no	no	no	no	yes	no	no	no	no	no	no	no	no	no	no	no	no	no	no	0	0	0	0	0	0	low
57	no	M	no	no	no	yes	no	no	no	no	no	no	no	2.4	no	no	1	no	yes	no	no	no	no	no	no	yes	no	yes	no	no	no	no	no	no	no	no	no	no	0	0	0	0	0	0	low
57	no	M	no	no	no	yes	no	no	no	no	no	no	no	1.6	no	no	1.2	no	no	no	no	no	no	no	no	yes	no	yes	no	no	no	no	no	no	no	no	no	no	0	0	0	0	0	0	low
57	no	M	no	no	no	yes	no	no	no	no	no	no	no	1.2	yes	no			yes	no	no	no	no	no	no	no	no	no	no	no	no	no	no	no	no	no	no	no	0	0	0	0	0	0	low
55	no	M	no	no	no	yes	no	no	no	no	no	no	no	4	no	no	3.4	yes	no	yes	no	no	no	no	no	yes	no	yes	no	no	no	no	no	no	no	no	no	no	0	0	0	0	0	0	low
40	yes	M	no	no	no	yes	no	no	no	no	no	no	no	7.1	no	no	0	no	no	no	no	no	no	no	no	yes	yes	yes	no	no	no	no	no	no	no	no	no	no	0	0	0	0	0	0	low
38	yes	M	no	no	no	yes	no	no	no	no	no	no	no	1.5	no	no			no	no	no	no	no	no	no	yes	yes	yes	no	no	no	no	no	no	no	no	no	no	0	0	0	0	0	0	low
40	yes	M	no	no	no	yes	no	no	no	no	no	no	no	0.6	yes	no			no	no	no	no	no	no	no	yes	yes	yes	no	no	no	no	no	no	no	no	no	no	0	0	0	0	0	0	low
34	yes	M	no	no	no	yes	no	no	no	no	no	no	no	0.7	yes	no	4.5	yes	no	no	no	no	no	no	no	yes	no	yes	no	no	no	no	no	no	no	no	no	no	0	0	0	0	0	0	low
63	no	M	no	no	no	yes	no	no	no	no	no	no	no	2.4	no	no			no	no	no	no	no	no	no	yes	no	yes	no	no	no	no	no	no	no	no	no	no	0	0	0	0	0	0	low
64	no	M	no	no	no	yes	no	no	no	no	no	no	no	1.2	yes	no	1.7	no	no	no	no	no	no	no	no	yes	no	yes	no	no	no	no	no	no	no	no	no	no	0	0	0	0	0	0	low
64	no	M	no	no	no	yes	no	no	no	no	no	no	no	2.4	no	no			no	no	no	no	no	yes	no	yes	yes	yes	no	no	no	no	no	no	no	no	no	no	0	0	0	0	0	0	low
62	no	M	no	no	no	yes	no	no	no	no	no	no	no	2.7	no	no			no	no	no	no	no	no	no	yes	no	yes	no	no	no	no	no	no	no	no	no	no	0	0	0	0	0	0	low
66	no	M	no	no	no	yes	no	no	no	no	no	no	no	1.7	no	no	1.8	no	no	no	no	no	no	yes	no	yes	no	yes	no	no	no	no	no	no	no	no	no	no	0	0	0	0	0	0	low
57	no	M	no	no	no	yes	yes	no	no	no	no	no	no	1.2	yes	no	4.4	yes	no	no	no	no	no	no	no	yes	no	yes	no	no	no	no	no	no	no	no	no	no	0	0	0	0	0	0	low
57	no	M	no	no	no	yes	yes	no	no	no	no	no	no	6.1	no	no	6	yes	no	no	no	no	no	yes	no	no	no	no	no	no	no	no	no	no	no	no	no	no	0	0	0	0	0	0	low
76	no	M	no	no	no	yes	yes	no	no	no	no	no	no	6	no	no	5.4	yes	no	no	no	no	no	yes	no	yes	no	yes	no	no	no	no	no	no	no	no	no	no	0	0	0	0	0	0	low
67	no	M	no	no	no	yes	yes	no	no	no	no	no	no	2.4	no	no	4.1	yes	no	no	no	no	no	no	no	yes	no	no	yes	yes	no	no	no	no	no	no	no	no	0	0	0	0	0	0	low
70	no	M	no	no	no	yes	no	no	no	no	no	no	no	1.8	no	no	1	no	no	no	no	no	no	no	no	yes	no	yes	no	no	no	no	no	no	no	no	no	no	0	0	0	0	0	0	low
70	no	M	no	no	no	yes	no	no	no	no	no	no	no	1.1	yes	no	1.7	no	no	no	no	no	no	no	no	yes	no	yes	no	no	no	no	no	no	no	no	no	no	0	0	0	0	0	0	low
70	no	M	no	no	no	yes	no	no	no	no	no	no	no	1.5	no	no			no	no	no	no	no	no	no	yes	no	no	yes	no	no	no	no	no	no	no	no	no	0	0	0	0	0	0	low
66	no	M	no	no	no	yes	yes	no	no	no	no	no	no	3.6	no	no	2.1	no	no	no	no	no	no	no	no	yes	no	yes	no	no	no	no	no	no	no	no	no	no	0	0	0	0	0	0	low
66	no	M	no	no	no	yes	yes	no	no	no	no	no	no	5.9	no	no	3.9	yes	no	no	no	no	no	no	no	yes	no	yes	no	no	no	no	no	no	no	no	no	no	0	0	0	0	0	0	low
83	no	M	no	no	no	yes	no	no	no	no	no	no	no	0.8	yes	no	1.9	no	no	no	no	no	no	no	no	yes	no	yes	no	no	no	no	no	no	no	no	no	no	0	0	0	0	0	0	low
67	no	M	no	no	no	yes	no	no	no	no	no	no	no	1	yes	no			no	no	no	no	no	no	no	no	no	no	no	no	no	no	no	no	no	no	no	no	0	0	0	0	0	0	low
72	no	M	no	no	no	yes	no	no	no	no	no	no	no	8.5	no	no	8.1	yes	no	no	no	no	no	no	no	yes	no	no	yes	yes	no	no	no	no	no	no	no	no	0	0	0	0	0	0	low
57	no	M	no	no	no	yes	no	no	no	no	no	yes	no	1.1	yes	no	1	no	no	no	no	no	no	no	no	yes	no	no	no	no	no	no	no	no	no	no	no	no	0	0	0	0	0	0	low
66	no	M	no	no	no	yes	no	no	no	no	no	yes	no	0.8	yes	no	3	no	no	yes	no	no	yes	yes	no	no	no	no	no	no	no	no	no	no	no	no	no	no	0	0	0	0	0	0	low
74	no	M	no	no	no	yes	yes	no	no	no	no	no	no	0.6	yes	no	9.4	yes	no	no	no	no	no	no	no	yes	no	no	yes	yes	no	no	no	no	no	no	no	no	0	0	0	0	0	0	low
62	no	M	no	no	no	yes	no	no	no	no	no	no	no	10	no	no			no	no	no	no	no	no	no	yes	no	no	no	no	no	no	no	no	no	no	no	no	0	0	0	0	0	0	low
70	no	M	no	no	no	yes	no	no	no	no	no	no	no	1.1	yes	no			no	yes	no	no	no	no	no	yes	no	no	no	no	no	no	no	no	no	no	no	no	0	0	0	0	0	0	low
66	no	M	no	no	no	yes	yes	no	no	no	no	no	no	3.2	no	no			no	no	no	no	no	no	no	yes	no	yes	no	no	no	no	no	no	no	no	no	no	0	0	0	0	0	0	low
80	no	M	no	no	no	yes	no	no	no	no	no	no	no	1.3	no	no	1.6	no	no	yes	no	no	no	no	no	yes	no	yes	no	no	no	no	no	no	no	no	no	no	0	0	0	0	0	0	low
23	yes	M	no	no	no	yes	no	no	no	no	no	no	no	0.6	yes	no	1.3	no	no	no	no	no	no	no	no	no	no	no	no	no	no	no	no	no	no	no	no	no	0	0	0	0	0	0	low
65	no	M	no	no	no	yes	no	no	no	no	no	no	no	1.9	no	no	2.1	no	no	no	no	no	no	no	no	yes	no	yes	no	no	no	no	no	no	no	no	no	no	0	0	0	0	0	0	low
68	no	M	no	no	no	yes	no	no	no	no	no	no	no	1.1	yes	no	1	no	no	no	no	no	no	no	no	yes	no	yes	no	no	no	no	no	no	no	no	no	no	0	0	0	0	0	0	low
68	no	M	no	no	no	yes	no	no	no	no	no	no	no	1.1	yes	no	1.3	no	no	no	no	no	no	no	no	yes	no	yes	no	no	no	no	no	no	no	no	no	no	0	0	0	0	0	0	low
69	no	M	no	no	no	yes	no	no	no	no	no	no	no	2.6	no	no	1.5	no	no	no	no	no	no	no	no	yes	no	yes	no	no	no	no	no	no	no	no	no	no	0	0	0	0	0	0	low
69	no	M	no	no	no	yes	no	no	no	no	no	no	no	0.7	yes	no	1.9	no	no	no	no	no	no	no	no	yes	yes	no	yes	no	no	no	no	no	no	no	no	no	0	0	0	0	0	0	low
77	no	M	no	no	no	yes	no	no	no	no	no	no	no	0.5	yes	no	2.3	no	no	no	no	no	no	no	no	yes	no	yes	no	no	no	no	no	no	no	no	no	no	0	0	0	0	0	0	low
70	no	M	no	no	no	yes	no	no	no	no	no	no	no	0.3	yes	no	2	no	no	no	no	no	no	no	no	yes	no	yes	no	no	no	no	no	no	no	no	no	no	0	0	0	0	0	0	low
68	no	M	no	no	no	yes	no	no	no	no	no	no	no	0.4	yes	no	3.1	yes	yes	yes	no	no	no	no	no	no	no	no	no	no	no	no	no	no	no	no	no	no	0	0	0	0	0	0	low
69	no	M	no	no	no	yes	no	no	no	no	no	no	no	1.2	yes	no	1	no	no	no	no	no	no	no	no	no	no	yes	no	no	no	no	no	no	no	no	no	no	0	0	0	0	0	0	low
65	no	M	no	no	no	yes	no	no	no	no	no	no	yes	0.63	yes	yes	1.6	no	no	yes	no	no	no	no	no	yes	no	yes	no	no	no	no	no	no	no	no	no	no	0	2	-2	0	0	0	low
67	no	M	no	no	no	no	no	no	no	no	no	no	yes	3.2	no	yes	3.7	yes	no	yes	no	no	no	no	no	yes	no	yes	no	no	no	no	no	no	no	no	no	no	0	2	-2	0	0	0	low
71	no	M	no	no	yes	no	no	no	no	no	no	no	yes	0.9	yes	yes	2.7	no	yes	yes	yes	no	no	no	no	no	no	no	no	no	no	no	no	no	no	no	no	no	0	2	-2	0	0	0	low
73	no	M	no	no	no	no	no	no	no	no	no	no	yes	3.76	no	yes	1.8	no	yes	no	no	no	no	no	no	yes	no	yes	no	no	no	no	no	no	no	no	no	no	0	2	-2	0	0	0	low
54	no	M	no	no	no	no	no	no	no	no	no	no	yes	5.9	no	yes	0	no	no	yes	no	no	no	yes	no	no	no	no	no	no	no	no	no	no	no	no	no	no	0	2	-2	0	0	0	low
78	no	M	no	no	no	no	no	no	no	no	no	no	yes	1	yes	yes	0	no	yes	yes	no	no	no	yes	no	no	no	no	no	no	no	no	no	no	no	no	no	no	0	2	-2	0	0	0	low
73	no	M	no	no	no	yes	no	no	no	no	no	no	no	0.74	yes	yes	4	yes	no	no	no	no	no	no	no	no	no	yes	no	no	no	yes	no	no	no	no	no	no	0	0	-2	2	0	0	low
80	no	M	no	no	no	yes	no	no	no	no	no	no	no	1.34	no	yes	5	yes	no	no	no	no	no	no	no	no	no	yes	no	no	no	yes	no	no	no	no	no	no	0	0	-2	2	0	0	low
81	no	M	no	no	no	yes	no	no	no	no	yes	no	no	0.87	yes	yes	7.6	yes	no	no	no	no	no	no	no	no	no	yes	no	no	no	yes	no	no	no	no	no	no	0	0	-2	2	0	0	low
51	no	M	no	no	no	yes	no	no	no	no	no	no	no	1.3	no	yes	6.6	yes	no	no	no	no	no	no	no	no	no	no	no	no	no	yes	no	no	no	no	no	no	0	0	-2	2	0	0	low
57	no	M	no	no	no	no	no	no	no	no	yes	no	no	0.35	yes	yes			no	no	no	no	no	no	no	no	no	no	no	no	no	yes	yes	no	no	no	no	no	0	0	-2	2	0	0	low
57	no	M	no	no	no	no	no	no	no	no	yes	no	no	0.85	yes	yes			no	no	no	no	no	no	no	no	no	no	no	no	no	yes	yes	no	no	no	no	no	0	0	-2	2	0	0	low
58	no	M	no	no	no	no	no	no	no	no	yes	no	no	1.03	yes	yes			no	no	no	no	no	no	no	no	no	no	no	no	no	yes	yes	no	no	no	no	no	0	0	-2	2	0	0	low
82	no	M	no	no	no	yes	no	no	no	no	yes	no	no	1.47	no	yes	2.2	no	no	no	no	no	no	no	no	no	no	yes	no	no	no	yes	yes	no	no	no	no	no	0	0	-2	2	0	0	low
82	no	M	no	no	no	no	no	no	no	no	yes	no	no	0.47	yes	yes	12.1	yes	no	no	no	no	no	no	no	no	no	no	no	no	no	yes	yes	no	no	no	no	no	0	0	-2	2	0	0	low
87	no	M	no	no	no	no	no	no	no	no	yes	no	no	0.6	yes	yes	5.5	yes	no	no	no	no	no	no	no	no	no	no	no	no	no	yes	yes	no	no	no	no	no	0	0	-2	2	0	0	low
58	no	M	no	no	no	yes	no	no	no	no	no	no	no	0.45	yes	yes	3.2	yes	no	no	no	no	no	no	no	yes	no	yes	no	no	no	yes	yes	no	no	no	no	no	0	0	-2	2	0	0	low
58	no	M	no	no	no	yes	no	no	no	no	no	no	no	0.46	yes	yes			no	no	no	no	no	no	no	yes	no	yes	no	no	no	yes	yes	no	no	no	no	no	0	0	-2	2	0	0	low
59	no	M	no	no	no	yes	no	no	no	no	no	no	no	0.52	yes	yes			no	no	no	no	no	no	no	yes	no	yes	no	no	no	yes	yes	no	no	no	no	no	0	0	-2	2	0	0	low
59	no	M	no	no	no	yes	no	no	no	no	no	no	no	0.68	yes	yes			no	no	no	no	no	no	no	yes	no	yes	no	no	no	yes	yes	no	no	no	no	no	0	0	-2	2	0	0	low
59	no	M	no	no	no	yes	no	no	no	no	no	no	no	0.71	yes	yes			no	no	no	no	no	no	no	yes	no	yes	no	no	no	yes	yes	no	no	no	no	no	0	0	-2	2	0	0	low
50	no	M	no	no	no	no	no	no	no	no	yes	no	no	0.5	yes	yes	4.9	yes	no	no	no	no	no	no	no	no	no	no	no	no	no	yes	yes	no	no	no	no	no	0	0	-2	2	0	0	low
41	yes	M	no	no	no	yes	no	no	no	no	yes	no	no			yes			no	no	no	no	no	no	no	no	no	no	no	no	no	yes	yes	no	no	no	no	no	0	0	-2	2	0	0	low
41	yes	M	no	no	no	yes	no	no	no	no	yes	no	no			yes			no	no	no	no	no	no	no	no	no	no	no	no	no	yes	yes	no	no	no	no	no	0	0	-2	2	0	0	low
73	no	M	no	no	no	yes	no	no	no	no	no	no	no	0.8	yes	yes	10.5	yes	no	no	no	no	no	no	no	no	no	no	no	no	no	yes	yes	no	no	no	no	no	0	0	-2	2	0	0	low
79	no	M	no	no	no	yes	no	no	no	no	yes	no	no	0.6	yes	yes			yes	no	no	no	no	no	no	no	no	no	no	no	no	yes	yes	no	no	no	no	no	0	0	-2	2	0	0	low
51	no	M	no	no	no	yes	no	no	no	no	no	no	no	0.9	yes	yes			no	no	no	no	no	no	no	no	no	no	no	no	no	yes	yes	no	no	no	no	no	0	0	-2	2	0	0	low
50	no	M	no	no	no	yes	no	no	no	no	yes	no	no	0.4	yes	yes	2.5	no	no	no	no	no	no	no	no	no	no	no	no	no	no	yes	yes	no	no	no	no	no	0	0	-2	2	0	0	low
71	no	M	no	no	no	no	no	no	R-Y	yes	no	no	no	0.6	yes	no			no	no	no	no	no	yes	no	no	no	no	no	no	no	no	no	no	no	no	no	no	0	0	0	0	0	0	low
90	no	M	no	no	no	yes	no	no	R-Y	yes	no	no	no	4.13	no	no	2.1	no	no	no	no	no	no	no	no	yes	no	no	no	no	no	no	no	no	no	no	no	no	0	0	0	0	0	0	low
88	no	M	no	no	no	yes	no	no	R-Y	yes	no	no	no	0.68	yes	no	1.5	no	no	no	no	no	no	no	no	yes	no	yes	no	no	no	no	no	no	no	no	no	no	0	0	0	0	0	0	low
71	no	M	no	no	no	yes	no	no	R-Y	yes	no	no	no	1.2	yes	no			no	no	no	no	yes	yes	no	no	no	no	no	no	no	no	no	no	no	no	no	no	0	0	0	0	0	0	low
65	no	M	no	no	no	no	no	no	R-Y	yes	no	no	no	3.3	no	no	2	no	no	no	no	no	no	no	no	yes	no	yes	no	no	no	no	no	no	no	no	no	no	0	0	0	0	0	0	low
87	no	M	no	no	no	yes	no	no	R-Y	yes	no	no	no	2.7	no	no	2.3	no	no	no	no	no	no	no	no	no	no	no	no	no	no	no	no	no	no	no	no	no	0	0	0	0	0	0	low
85	no	M	no	no	no	yes	no	no	R-Y	yes	no	no	no	3.97	no	no			no	no	no	no	no	no	no	yes	no	yes	no	no	no	no	no	no	no	no	no	no	0	0	0	0	0	0	low
77	no	M	no	no	no	yes	no	no	R-Y	yes	no	no	no	1.4	no	no	1.6	no	no	yes	no	no	yes	yes	no	no	no	no	no	no	no	no	no	no	no	no	no	no	0	0	0	0	0	0	low
77	no	M	no	no	no	yes	no	no	R-Y	yes	no	no	no	6.1	no	no	2	no	no	yes	no	no	yes	yes	no	no	no	no	no	no	no	no	no	no	no	no	no	no	0	0	0	0	0	0	low
84	no	M	no	yes	no	no	no	no	R-Y	yes	no	no	yes	0.5	yes	yes	1.34	no	no	yes	no	no	yes	yes	no	no	no	no	no	no	no	no	no	no	no	no	no	no	0	2	-2	0	0	0	low
86	no	M	no	no	no	yes	no	no	no	no	no	no	no	0.59	yes	yes	2.7	no	yes	yes	no	no	no	yes	no	no	no	no	no	no	yes	yes	no	no	no	no	no	no	0	0	-2	2	0	0	low
69	no	M	no	no	no	no	no	no	no	no	no	no	no	1	yes	yes	4.8	yes	no	yes	no	no	no	yes	no	no	no	no	no	no	yes	yes	no	no	no	no	no	no	0	0	-2	2	0	0	low
58	no	M	no	no	no	yes	no	no	no	no	no	no	no	0.4	yes	yes			no	no	no	no	no	no	no	no	no	no	no	no	yes	yes	no	no	no	no	no	no	0	0	-2	2	0	0	low
66	no	M	no	no	no	yes	no	no	no	no	yes	no	no	0.59	yes	no			no	no	no	yes	no	yes	no	yes	no	yes	no	no	no	no	no	no	no	no	no	no	0	0	0	0	0	0	low
64	no	M	no	no	no	yes	no	no	no	no	no	no	no	5.27	no	no	3.5	yes	no	no	no	yes	no	no	no	yes	no	yes	no	no	no	no	no	no	no	no	no	no	0	0	0	0	0	0	low
68	no	M	no	no	yes	yes	no	no	no	no	no	yes	no	2.26	no	no			no	no	no	yes	no	no	no	yes	no	yes	no	no	no	no	no	no	no	no	no	no	0	0	0	0	0	0	low
75	no	M	no	no	no	yes	yes	no	no	no	no	no	no	3	no	no			no	no	no	yes	no	no	no	yes	no	no	yes	no	no	no	no	no	no	no	no	no	0	0	0	0	0	0	low
84	no	M	no	no	no	yes	no	no	no	no	yes	no	no	0.3	yes	yes	6.3	yes	no	no	no	yes	no	no	no	yes	no	no	no	no	no	yes	yes	no	no	no	no	no	0	0	-2	2	0	0	low
79	no	M	no	no	no	yes	no	no	R-Y	yes	no	no	no	1.01	yes	no	2.6	no	yes	no	no	yes	no	yes	no	no	no	no	no	no	no	no	no	no	no	no	no	no	0	0	0	0	0	0	low
89	no	M	no	no	no	yes	no	no	R-Y	yes	no	yes	no	1.5	no	no	1.6	no	no	no	no	yes	no	yes	no	yes	no	yes	no	no	no	no	no	no	no	no	no	no	0	0	0	0	0	0	low
53	no	M	no	no	no	yes	no	no	no	no	yes	no	no	0.8	yes	yes			no	no	no	no	no	no	no	yes	no	yes	no	no	yes	yes	yes	yes	no	no	no	no	0	0	-2	2	0	0	low
54	no	M	no	no	no	yes	no	no	no	no	yes	no	no	0.8	yes	yes			no	no	no	no	no	no	no	yes	no	yes	no	no	yes	yes	yes	yes	no	no	no	no	0	0	-2	2	0	0	low
54	no	M	no	no	no	yes	no	no	no	no	yes	no	no	0.7	yes	yes			no	no	no	no	no	no	no	yes	no	yes	no	no	yes	yes	yes	yes	no	no	no	no	0	0	-2	2	0	0	low
70	no	M	no	no	no	yes	no	no	no	no	no	no	no	0.7	yes	yes			no	no	no	no	no	no	no	no	no	no	no	no	yes	yes	yes	yes	no	no	no	no	0	0	-2	2	0	0	low
66	no	F	yes	no	no	yes	yes	no	B-I	yes	no	no	no	1	yes	no	12.6	yes	no	no	no	no	no	no	no	yes	no	yes	no	no	no	no	no	no	no	no	no	no	1	0	0	0	0	1	moderate
66	no	F	yes	no	no	yes	yes	no	B-I	yes	no	no	no	0.8	yes	no			no	no	no	no	no	no	no	yes	no	yes	no	no	no	no	no	no	no	no	no	no	1	0	0	0	0	1	moderate
89	no	F	yes	no	no	yes	no	no	B-I	yes	no	no	no	0.7	yes	no			no	no	no	no	no	yes	no	no	no	no	no	no	no	no	no	no	no	no	no	no	1	0	0	0	0	1	moderate
73	no	F	yes	no	no	yes	no	no	B-II	yes	no	no	no	1.7	no	no	2.7	no	no	no	no	no	no	no	no	yes	no	no	yes	no	no	no	no	no	no	no	no	no	1	0	0	0	0	1	moderate
84	no	F	yes	no	no	yes	no	no	no	no	no	no	no	0.5	yes	no	3.2	yes	yes	no	no	no	yes	yes	no	no	no	no	no	no	no	no	no	no	no	no	no	no	1	0	0	0	0	1	moderate
87	no	F	yes	no	no	yes	no	no	no	no	no	no	no	0.92	yes	no			no	no	no	no	no	no	no	yes	no	no	yes	yes	no	no	no	no	no	no	no	no	1	0	0	0	0	1	moderate
79	no	F	yes	yes	no	no	no	no	no	no	no	no	no	2.5	no	no			no	no	no	no	no	no	no	yes	no	yes	no	no	no	no	no	no	no	no	no	no	1	0	0	0	0	1	moderate
51	no	F	yes	no	no	no	no	no	no	no	no	no	no	12.8	no	no	2.1	no	no	yes	no	no	no	no	no	yes	yes	yes	no	no	no	no	no	no	no	no	no	no	1	0	0	0	0	1	moderate
67	no	F	yes	no	no	no	no	no	no	no	no	no	no	1.3	no	no			no	no	no	no	no	no	no	no	no	no	no	no	no	no	no	no	no	no	no	no	1	0	0	0	0	1	moderate
74	no	F	yes	no	no	no	yes	no	no	no	no	yes	no	6.3	no	no	2	no	no	no	no	no	no	no	no	yes	no	no	yes	yes	no	no	no	no	no	no	no	no	1	0	0	0	0	1	moderate
79	no	F	yes	no	no	no	no	no	no	no	no	no	no	5.2	no	no			no	no	no	no	no	no	no	yes	no	yes	no	no	no	no	no	no	no	no	no	no	1	0	0	0	0	1	moderate
67	no	F	yes	no	no	yes	no	no	no	no	no	no	no	0.79	yes	no	1.6	no	no	no	no	no	no	yes	no	yes	no	no	no	no	no	no	no	no	no	no	no	no	1	0	0	0	0	1	moderate
83	no	F	yes	no	no	no	no	no	no	no	no	no	no	0.4	yes	no			no	no	no	no	no	yes	no	yes	yes	no	yes	yes	no	no	no	no	no	no	no	no	1	0	0	0	0	1	moderate
85	no	F	yes	no	no	yes	no	no	no	no	yes	no	no	0.48	yes	no			no	no	no	no	yes	yes	no	yes	no	no	no	no	no	no	no	no	no	no	no	no	1	0	0	0	0	1	moderate
87	no	F	yes	yes	no	no	no	no	no	no	no	no	no	3.2	no	no	2.27	no	no	no	no	no	no	yes	no	yes	no	yes	no	no	no	no	no	no	no	no	no	no	1	0	0	0	0	1	moderate
89	no	F	yes	no	no	yes	no	no	no	no	no	no	no	1.77	no	no	6	yes	yes	no	no	no	no	no	no	no	no	no	no	no	no	no	no	no	no	no	no	no	1	0	0	0	0	1	moderate
84	no	F	yes	no	no	yes	no	no	no	no	no	no	no	0.83	yes	no			yes	no	no	no	no	yes	no	yes	no	yes	no	no	no	no	no	no	no	no	no	no	1	0	0	0	0	1	moderate
59	no	F	yes	no	no	yes	yes	no	no	no	yes	yes	no	0.97	yes	no	2	no	no	no	no	no	no	no	no	yes	no	no	yes	yes	no	no	no	no	yes	yes	no	no	1	0	0	0	0	1	moderate
84	no	F	yes	yes	no	no	no	no	no	no	no	no	no	2.3	no	no			no	no	no	no	no	no	no	yes	no	yes	no	no	no	no	no	no	no	no	no	no	1	0	0	0	0	1	moderate
93	no	F	yes	no	no	no	no	no	no	no	no	no	no	0.8	yes	no			no	no	no	no	no	yes	no	no	no	no	no	no	no	no	no	no	no	no	no	no	1	0	0	0	0	1	moderate
69	no	F	yes	no	no	yes	no	no	no	no	no	no	no	1.07	yes	no			no	no	no	no	no	no	no	no	no	no	no	no	no	no	no	no	no	no	no	no	1	0	0	0	0	1	moderate
80	no	F	yes	no	no	no	no	no	no	no	no	no	no	0.7	yes	no			no	no	no	no	yes	yes	no	no	no	no	no	no	no	no	no	no	no	no	no	no	1	0	0	0	0	1	moderate
69	no	F	yes	no	no	yes	no	no	no	no	no	no	no	1.66	no	no	1	no	no	no	no	no	no	no	no	no	yes	yes	no	no	no	no	no	no	no	no	no	no	1	0	0	0	0	1	moderate
84	no	F	yes	no	no	yes	no	no	no	no	no	no	no	0.36	yes	no			yes	no	no	no	no	yes	no	no	no	no	no	no	no	no	no	no	no	no	no	no	1	0	0	0	0	1	moderate
81	no	F	yes	no	no	no	yes	no	no	no	no	no	no	9.9	no	no	17.4	yes	no	no	no	no	no	no	no	yes	no	no	yes	no	no	no	no	no	no	no	no	no	1	0	0	0	0	1	moderate
60	no	F	yes	no	no	no	no	no	no	no	no	no	no	2.5	no	no	2.3	no	yes	yes	no	no	no	yes	no	yes	no	yes	no	no	no	no	no	no	no	no	no	no	1	0	0	0	0	1	moderate
80	no	F	yes	no	no	yes	no	no	no	no	no	no	no	0.56	yes	no	2.9	no	no	no	no	no	no	no	no	yes	no	yes	no	no	no	no	no	no	no	no	no	no	1	0	0	0	0	1	moderate
54	no	F	yes	no	no	yes	no	no	no	no	no	no	no	0.7	yes	no			no	no	no	no	no	no	no	yes	no	yes	no	no	no	no	no	no	no	no	no	no	1	0	0	0	0	1	moderate
79	no	F	yes	no	no	yes	no	no	no	no	no	no	no	2.74	no	no	1.1	no	yes	no	no	no	no	no	no	yes	yes	no	yes	no	no	no	no	no	no	no	no	no	1	0	0	0	0	1	moderate
68	no	F	yes	no	no	no	no	no	no	no	no	no	no	1	yes	no	1.9	no	yes	no	no	no	no	no	no	yes	no	yes	no	no	no	no	no	no	no	no	no	no	1	0	0	0	0	1	moderate
63	no	F	yes	no	no	yes	no	no	no	no	no	no	no	0.72	yes	no			no	yes	no	no	no	yes	no	no	no	no	no	no	no	no	no	no	no	no	no	no	1	0	0	0	0	1	moderate
82	no	F	yes	no	no	no	no	no	no	no	no	no	no	2.1	no	no	0	no	no	no	no	no	no	no	no	no	no	no	no	no	no	no	no	no	no	no	no	no	1	0	0	0	0	1	moderate
82	no	F	yes	no	no	no	no	no	no	no	no	no	no	1.4	no	no	0	no	no	yes	no	no	no	no	no	no	no	no	no	no	no	no	no	no	no	no	no	no	1	0	0	0	0	1	moderate
69	no	F	yes	no	no	yes	yes	no	no	no	no	no	no	0.49	yes	no			no	no	no	no	no	no	no	yes	no	no	yes	yes	no	no	no	no	no	no	no	no	1	0	0	0	0	1	moderate
89	no	F	yes	no	no	no	no	no	no	no	no	no	no	14	no	no	1.3	no	yes	yes	no	no	no	yes	no	yes	no	yes	no	no	no	no	no	no	no	no	no	no	1	0	0	0	0	1	moderate
69	no	F	yes	no	no	yes	yes	no	no	no	no	no	no	0.91	yes	no			no	no	no	no	no	no	no	yes	no	no	yes	yes	no	no	no	no	no	no	no	no	1	0	0	0	0	1	moderate
81	no	F	yes	no	no	no	no	no	no	no	no	no	no	0.7	yes	no	2.6	no	no	no	no	no	no	yes	no	no	no	no	no	no	no	no	no	no	no	no	no	no	1	0	0	0	0	1	moderate
84	no	F	yes	no	no	no	no	no	no	no	no	no	no	0.8	yes	no			yes	no	no	no	yes	yes	no	no	no	no	no	no	no	no	no	no	no	no	no	no	1	0	0	0	0	1	moderate
92	no	F	yes	no	no	no	no	no	no	no	no	no	no	6.6	no	no	1.2	no	no	no	no	no	no	no	no	yes	no	no	yes	no	no	no	no	no	no	no	no	no	1	0	0	0	0	1	moderate
92	no	F	yes	no	no	no	no	no	no	no	no	no	no	2.13	no	no	2	no	yes	no	no	no	no	no	no	yes	no	yes	no	no	no	no	no	no	no	no	no	no	1	0	0	0	0	1	moderate
92	no	F	yes	no	no	no	no	no	no	no	no	no	no	2.04	no	no	2	no	yes	no	no	no	no	no	no	yes	no	yes	no	no	no	no	no	no	no	no	no	no	1	0	0	0	0	1	moderate
76	no	F	yes	no	no	yes	no	no	no	no	no	no	no	1.64	no	no	4.3	yes	no	no	no	no	no	no	no	yes	no	yes	no	no	no	no	no	no	no	no	no	no	1	0	0	0	0	1	moderate
73	no	F	yes	no	no	no	yes	no	no	no	no	no	no	0.88	yes	no	15.6	yes	yes	yes	no	no	no	no	no	yes	no	yes	no	no	no	no	no	no	no	no	no	no	1	0	0	0	0	1	moderate
84	no	F	yes	no	no	yes	no	no	no	no	no	no	no	0.39	yes	no	0	no	no	yes	no	no	no	yes	no	no	no	no	no	no	no	no	no	no	no	no	no	no	1	0	0	0	0	1	moderate
61	no	F	yes	no	no	no	no	no	no	no	no	no	no	1	yes	no			no	no	no	no	no	no	no	yes	yes	yes	no	no	no	no	no	no	no	no	no	no	1	0	0	0	0	1	moderate
71	no	F	yes	no	no	no	no	no	no	no	no	no	no	6.07	no	no	1.6	no	yes	no	no	no	no	no	no	yes	no	yes	no	no	no	no	no	no	no	no	no	no	1	0	0	0	0	1	moderate
75	no	F	yes	no	no	no	yes	no	no	no	no	no	no	1.8	no	no	11.1	yes	no	no	no	no	no	no	no	yes	no	no	yes	no	no	no	no	no	no	no	no	no	1	0	0	0	0	1	moderate
68	no	F	yes	no	no	no	no	no	no	no	no	no	no	4.81	no	no	2	no	yes	no	no	no	no	no	no	yes	no	yes	no	no	no	no	no	no	no	no	no	no	1	0	0	0	0	1	moderate
86	no	F	yes	no	no	no	no	no	no	no	no	no	no	0.4	yes	no			no	no	no	no	no	no	no	yes	no	yes	no	no	no	no	no	no	no	no	no	no	1	0	0	0	0	1	moderate
81	no	F	yes	no	no	no	yes	no	no	no	no	no	no	2.4	no	no	4.8	yes	no	no	no	no	no	no	no	yes	no	yes	no	no	no	no	no	no	no	no	no	no	1	0	0	0	0	1	moderate
74	no	F	yes	no	no	yes	no	no	no	no	no	no	no	3.06	no	no			no	no	no	no	no	no	no	no	no	yes	no	no	no	no	no	no	no	no	no	no	1	0	0	0	0	1	moderate
94	no	F	yes	no	yes	yes	no	no	no	no	no	no	no	0.58	yes	no	0.8	no	yes	no	no	no	no	yes	no	yes	no	yes	no	no	no	no	no	no	no	no	no	no	1	0	0	0	0	1	moderate
80	no	F	yes	no	no	yes	no	no	no	no	no	no	no	1.21	no	no			no	no	no	no	no	no	no	yes	no	yes	no	no	no	no	no	no	no	no	no	no	1	0	0	0	0	1	moderate
84	no	F	yes	no	no	yes	no	no	no	no	no	no	no	0.46	yes	no	0	no	no	yes	no	no	no	yes	no	yes	yes	no	no	no	no	no	no	no	no	no	no	no	1	0	0	0	0	1	moderate
81	no	F	yes	no	no	yes	no	no	no	no	no	no	no	0.66	yes	no	2.5	no	no	no	no	no	no	no	no	no	no	no	no	no	no	no	no	no	no	no	no	no	1	0	0	0	0	1	moderate
92	no	F	yes	no	no	no	no	no	no	no	no	no	no	3.8	no	no			no	no	no	no	no	no	no	yes	no	no	yes	no	no	no	no	no	no	no	no	no	1	0	0	0	0	1	moderate
84	no	F	yes	no	no	no	no	no	no	no	no	no	no	3.92	no	no	3	no	yes	no	no	no	no	yes	no	yes	no	yes	no	no	no	no	no	no	no	no	no	no	1	0	0	0	0	1	moderate
92	no	F	yes	no	no	no	no	no	no	no	no	no	no	7.52	no	no	1.1	no	no	no	no	no	no	no	no	yes	no	yes	no	no	no	no	no	no	no	no	no	no	1	0	0	0	0	1	moderate
70	no	F	yes	no	no	yes	no	no	no	no	no	no	no	1.06	yes	no	0	no	no	no	no	no	no	no	no	yes	no	yes	no	no	no	no	no	no	no	no	no	no	1	0	0	0	0	1	moderate
72	no	F	yes	no	no	no	yes	no	no	no	no	no	no	3.83	no	no	9.8	yes	no	no	no	no	no	no	no	yes	no	no	yes	no	no	no	no	no	no	no	no	no	1	0	0	0	0	1	moderate
84	no	F	yes	no	no	no	yes	no	no	no	no	no	no	2.59	no	no	4.7	yes	no	no	no	no	no	no	no	yes	no	yes	no	no	no	no	no	no	no	no	no	no	1	0	0	0	0	1	moderate
59	no	F	yes	no	no	no	no	no	no	no	no	no	no	0.39	yes	no	2.5	no	no	no	no	no	no	no	no	no	no	no	no	no	no	no	no	no	no	no	no	no	1	0	0	0	0	1	moderate
80	no	F	yes	no	no	yes	yes	no	no	no	no	no	no	8.23	no	no	2.8	no	no	yes	no	no	no	no	no	yes	no	no	yes	yes	no	no	no	no	no	no	no	no	1	0	0	0	0	1	moderate
80	no	F	yes	no	no	yes	yes	no	no	no	no	no	no	6.78	no	no	2	no	no	no	no	no	no	no	no	yes	yes	yes	no	no	no	no	no	no	no	no	no	no	1	0	0	0	0	1	moderate
87	no	F	yes	no	no	yes	no	no	no	no	no	no	no	1.28	no	no			no	no	no	no	yes	yes	no	no	no	no	no	no	no	no	no	no	no	no	no	no	1	0	0	0	0	1	moderate
70	no	F	yes	no	no	yes	no	no	no	no	no	no	no	0.47	yes	no	3	no	no	yes	no	no	no	yes	no	no	no	no	no	no	no	no	no	no	yes	yes	no	no	1	0	0	0	0	1	moderate
88	no	F	yes	no	no	yes	no	no	no	no	no	no	no	0.69	yes	no			no	yes	no	no	yes	yes	no	no	no	no	no	no	no	no	no	no	no	no	no	no	1	0	0	0	0	1	moderate
89	no	F	yes	no	no	yes	no	no	no	no	no	no	no	0.85	yes	no	3	no	no	no	no	no	no	no	no	yes	no	yes	no	no	no	no	no	no	no	no	no	no	1	0	0	0	0	1	moderate
89	no	F	yes	no	no	yes	no	no	no	no	no	no	no	0.47	yes	no	3	no	no	no	no	no	no	no	no	yes	no	yes	no	no	no	no	no	no	no	no	no	no	1	0	0	0	0	1	moderate
84	no	F	yes	no	no	no	yes	no	no	no	no	no	no	9.3	no	no	4.7	yes	no	no	no	no	no	no	no	yes	no	yes	no	no	no	no	no	no	no	no	no	no	1	0	0	0	0	1	moderate
82	no	F	yes	no	no	yes	no	no	no	no	no	no	no	0.85	yes	no			yes	yes	no	no	no	no	no	yes	no	yes	no	no	no	no	no	no	no	no	no	no	1	0	0	0	0	1	moderate
80	no	F	yes	no	no	no	yes	no	no	no	no	no	no	0.69	yes	no	12.7	yes	no	no	no	no	no	no	no	yes	no	no	yes	yes	no	no	no	no	no	no	no	no	1	0	0	0	0	1	moderate
82	no	F	yes	no	no	yes	no	no	no	no	no	no	no	0.82	yes	no			yes	yes	yes	no	no	yes	no	no	no	no	no	no	no	no	no	no	no	no	no	no	1	0	0	0	0	1	moderate
82	no	F	yes	no	no	no	no	no	no	no	no	no	no	0.99	yes	no			no	no	no	no	no	yes	no	no	no	no	no	no	no	no	no	no	no	no	no	no	1	0	0	0	0	1	moderate
92	no	F	yes	no	no	yes	no	no	no	no	no	no	no	1	yes	no			no	no	no	no	no	no	no	yes	no	no	yes	yes	no	no	no	no	no	no	no	no	1	0	0	0	0	1	moderate
92	no	F	yes	no	no	no	no	no	no	no	no	no	no	8.79	no	no	1.1	no	no	no	no	no	no	no	no	yes	no	yes	no	no	no	no	no	no	no	no	no	no	1	0	0	0	0	1	moderate
90	no	F	yes	no	no	yes	no	no	no	no	no	no	no	5.2	no	no	1.7	no	no	no	no	no	no	yes	no	no	no	no	no	no	no	no	no	no	no	no	no	no	1	0	0	0	0	1	moderate
70	no	F	yes	no	no	yes	no	no	no	no	no	no	no	1.73	no	no			yes	no	no	no	no	no	no	yes	no	no	yes	no	no	no	no	no	no	no	no	no	1	0	0	0	0	1	moderate
73	no	F	yes	no	no	yes	no	no	no	no	no	no	no	14.9	no	no			no	no	no	no	no	no	no	yes	no	yes	no	no	no	no	no	no	no	no	no	no	1	0	0	0	0	1	moderate
82	no	F	yes	no	no	yes	no	no	no	no	no	no	no	6.7	no	no	4.1	yes	no	no	no	no	no	no	no	yes	yes	no	yes	no	no	no	no	no	no	no	no	no	1	0	0	0	0	1	moderate
92	no	F	yes	no	no	yes	no	no	no	no	no	no	no	2.9	no	no	1.5	no	no	no	no	no	no	yes	no	yes	no	yes	no	no	no	no	no	no	no	no	no	no	1	0	0	0	0	1	moderate
81	no	F	yes	no	no	yes	no	no	no	no	no	no	no	0.31	yes	no			yes	no	no	no	no	no	no	no	no	no	no	no	no	no	no	no	no	no	no	no	1	0	0	0	0	1	moderate
83	no	F	yes	no	no	yes	yes	no	no	no	no	no	no	0.42	yes	no	4.6	yes	no	no	no	no	no	no	no	yes	no	yes	no	no	no	no	no	no	no	no	no	no	1	0	0	0	0	1	moderate
84	no	F	yes	no	no	yes	yes	no	no	no	no	no	no	1.88	no	no	10	yes	no	no	no	no	no	no	no	no	no	no	no	no	no	no	no	no	no	no	no	no	1	0	0	0	0	1	moderate
70	no	F	yes	no	no	no	no	no	no	no	no	no	no	2.2	no	no	0	no	yes	no	no	no	no	no	no	yes	no	yes	no	no	no	no	no	no	no	no	no	no	1	0	0	0	0	1	moderate
81	no	F	yes	no	no	yes	yes	no	no	no	no	no	no	1.99	no	no			no	no	no	no	no	no	no	yes	no	no	yes	yes	no	no	no	no	no	no	no	no	1	0	0	0	0	1	moderate
95	no	F	yes	no	no	no	no	no	no	no	no	no	no	0.6	yes	no	1.6	no	no	no	no	no	no	no	no	no	no	no	no	no	no	no	no	no	no	no	no	no	1	0	0	0	0	1	moderate
91	no	F	yes	no	no	yes	no	no	no	no	no	no	no	3.2	no	no	1.5	no	no	no	no	no	no	yes	no	yes	no	yes	no	no	no	no	no	no	no	no	no	no	1	0	0	0	0	1	moderate
89	no	F	yes	no	no	no	no	no	no	no	no	no	no	1.2	yes	no	0	no	yes	yes	no	no	no	yes	no	no	no	no	no	no	no	no	no	no	no	no	no	no	1	0	0	0	0	1	moderate
61	no	F	yes	no	no	yes	no	no	no	no	no	no	no	1.1	yes	no	2.3	no	no	no	no	no	no	no	no	no	no	no	no	no	no	no	no	no	yes	yes	no	no	1	0	0	0	0	1	moderate
93	no	F	yes	no	no	yes	no	no	no	no	no	yes	no	6.2	no	no	7	yes	no	no	no	no	no	yes	no	no	no	no	no	no	no	no	no	no	yes	no	yes	no	1	0	0	0	0	1	moderate
46	yes	F	yes	no	no	yes	no	no	no	no	no	no	no	4.53	no	no			no	no	no	no	no	no	no	yes	no	yes	no	no	no	no	no	no	no	no	no	no	1	0	0	0	0	1	moderate
95	no	F	yes	no	no	no	no	no	no	no	yes	no	no	0.5	yes	no	1.5	no	no	no	no	no	no	yes	no	no	no	no	no	no	no	no	no	no	no	no	no	no	1	0	0	0	0	1	moderate
79	no	F	yes	no	no	yes	no	no	no	no	no	no	no	3.2	no	no	1.3	no	no	no	no	no	no	no	no	yes	no	yes	no	no	no	no	no	no	no	no	no	no	1	0	0	0	0	1	moderate
83	no	F	yes	no	no	yes	no	no	no	no	no	no	no	0.5	yes	no	3.2	yes	no	no	no	no	no	no	no	no	no	no	no	no	no	no	no	no	no	no	no	no	1	0	0	0	0	1	moderate
66	no	F	yes	no	no	yes	yes	no	no	no	no	no	no	3	no	no	7.5	yes	no	no	no	no	no	no	no	yes	no	no	yes	no	no	no	no	no	no	no	no	no	1	0	0	0	0	1	moderate
79	no	F	yes	no	no	yes	no	no	no	no	no	no	no	0.7	yes	no	2.4	no	no	no	no	no	no	no	no	yes	no	yes	no	no	no	no	no	no	no	no	no	no	1	0	0	0	0	1	moderate
79	no	F	yes	no	no	yes	no	no	no	no	no	no	no	2.7	no	no	4.3	yes	no	no	no	no	no	no	no	yes	no	yes	no	no	no	no	no	no	no	no	no	no	1	0	0	0	0	1	moderate
73	no	F	yes	no	no	yes	yes	no	no	no	no	no	no	2	no	no	6.5	yes	no	no	no	no	no	no	no	yes	no	yes	no	no	no	no	no	no	no	no	no	no	1	0	0	0	0	1	moderate
72	no	F	yes	no	no	yes	no	no	no	no	no	no	no	0.8	yes	no	2.2	no	no	no	no	no	no	no	no	yes	no	yes	no	no	no	no	no	no	no	no	no	no	1	0	0	0	0	1	moderate
50	no	F	yes	no	no	yes	yes	no	no	no	yes	no	no	0.5	yes	no	7.1	yes	no	no	no	no	no	no	no	yes	no	no	yes	no	no	no	no	no	yes	yes	no	no	1	0	0	0	0	1	moderate
75	no	F	yes	no	no	no	no	no	no	no	no	no	no	3.4	no	no	0.5	no	yes	yes	no	no	no	no	no	yes	no	yes	no	no	no	no	no	no	no	no	no	no	1	0	0	0	0	1	moderate
75	no	F	yes	no	no	yes	no	no	no	no	no	no	no	0.8	yes	no	0.5	no	no	yes	no	no	no	yes	no	no	no	no	no	no	no	no	no	no	no	no	no	no	1	0	0	0	0	1	moderate
84	no	F	yes	no	no	yes	no	no	no	no	no	no	no	1.2	yes	no	1.8	no	yes	no	no	no	no	no	no	yes	no	no	yes	yes	no	no	no	no	no	no	no	no	1	0	0	0	0	1	moderate
75	no	F	yes	no	no	yes	yes	no	no	no	no	no	no	15.4	no	no	4.4	yes	no	no	no	no	no	no	no	yes	no	no	yes	yes	no	no	no	no	no	no	no	no	1	0	0	0	0	1	moderate
74	no	F	yes	no	no	yes	no	no	no	no	no	no	no	1.7	no	no	1	no	no	no	no	no	no	no	no	yes	no	no	yes	no	no	no	no	no	no	no	no	no	1	0	0	0	0	1	moderate
64	no	F	yes	no	no	yes	yes	no	no	no	no	no	no	1.2	yes	no	2.5	no	no	no	no	no	no	no	no	yes	no	yes	no	no	no	no	no	no	no	no	no	no	1	0	0	0	0	1	moderate
64	no	F	yes	no	no	no	yes	no	no	no	no	no	no	0.7	yes	no	4.8	yes	no	no	no	no	no	no	no	yes	no	yes	no	no	no	no	no	no	no	no	no	no	1	0	0	0	0	1	moderate
84	no	F	yes	no	no	yes	no	no	no	no	no	no	no	1.94	no	no	2.1	no	no	yes	no	no	no	yes	no	no	no	no	no	no	no	no	no	no	no	no	no	no	1	0	0	0	0	1	moderate
70	no	F	yes	no	no	yes	yes	no	no	no	no	no	no	0.8	yes	no	8.7	yes	no	no	no	no	no	no	no	yes	no	yes	no	no	no	no	no	no	no	no	no	no	1	0	0	0	0	1	moderate
70	no	F	yes	no	no	yes	yes	no	no	no	no	no	no	3.3	no	no	9.2	yes	no	no	no	no	no	no	no	yes	no	yes	no	no	no	no	no	no	no	no	no	no	1	0	0	0	0	1	moderate
70	no	F	yes	no	no	yes	yes	no	no	no	no	no	no	8	no	no			no	no	no	no	no	no	no	yes	no	yes	no	no	no	no	no	no	no	no	no	no	1	0	0	0	0	1	moderate
68	no	F	yes	no	no	yes	yes	no	no	no	no	no	no	1	yes	no	2	no	no	no	no	no	no	no	no	yes	no	no	yes	no	no	no	no	no	no	no	no	no	1	0	0	0	0	1	moderate
78	no	F	yes	no	no	yes	no	no	no	no	no	no	no	1.8	no	no			no	no	no	no	no	no	no	yes	no	yes	no	no	no	no	no	no	no	no	no	no	1	0	0	0	0	1	moderate
54	no	F	yes	no	no	yes	yes	no	no	no	no	no	no	0.9	yes	no	9.2	yes	no	no	no	no	no	no	no	yes	no	yes	no	no	no	no	no	no	no	no	no	no	1	0	0	0	0	1	moderate
65	no	F	yes	no	no	yes	no	no	no	no	no	no	no	1	yes	no	1.9	no	no	no	no	no	no	no	no	yes	no	yes	no	no	no	no	no	no	no	no	no	no	1	0	0	0	0	1	moderate
67	no	F	yes	no	no	yes	no	no	no	no	no	no	no	1.8	no	no	1.4	no	no	no	no	no	no	no	no	yes	no	yes	no	no	no	no	no	no	no	no	no	no	1	0	0	0	0	1	moderate
67	no	F	yes	no	no	yes	no	no	no	no	no	no	no	1.5	no	no	1.8	no	no	no	no	no	no	no	no	no	no	no	no	no	no	no	no	no	no	no	no	no	1	0	0	0	0	1	moderate
70	no	F	yes	no	no	yes	no	no	no	no	no	no	no	1.5	no	no	1	no	no	no	no	no	no	no	no	yes	no	yes	no	no	no	no	no	no	no	no	no	no	1	0	0	0	0	1	moderate
71	no	F	yes	no	no	yes	no	no	no	no	no	no	no	2.2	no	no	1.3	no	no	no	no	no	no	no	no	yes	no	no	yes	no	no	no	no	no	yes	yes	no	no	1	0	0	0	0	1	moderate
71	no	F	yes	no	no	yes	no	no	no	no	no	no	no	5.7	no	no	1.9	no	no	no	no	no	no	no	no	yes	no	yes	no	no	no	no	no	no	no	no	no	no	1	0	0	0	0	1	moderate
71	no	F	yes	no	no	yes	no	no	no	no	no	no	no	5	no	no	2.2	no	no	no	no	no	no	no	no	yes	no	yes	no	no	no	no	no	no	no	no	no	no	1	0	0	0	0	1	moderate
71	no	F	yes	no	no	yes	no	no	no	no	no	no	no	2.2	no	no			no	no	no	no	no	no	no	yes	no	yes	no	no	no	no	no	no	no	no	no	no	1	0	0	0	0	1	moderate
83	no	F	yes	no	no	yes	no	no	no	no	no	no	no	0.5	yes	no	2.5	no	no	no	no	no	no	no	no	yes	no	yes	no	no	no	no	no	no	no	no	no	no	1	0	0	0	0	1	moderate
69	no	F	yes	no	no	yes	no	no	no	no	no	no	no	27.5	no	no	1	no	no	no	no	no	no	no	no	yes	no	yes	no	no	no	no	no	no	no	no	no	no	1	0	0	0	0	1	moderate
69	no	F	yes	no	no	yes	no	no	no	no	no	no	no	3.4	no	no	1.5	no	no	no	no	no	no	no	no	yes	no	yes	no	no	no	no	no	no	no	no	no	no	1	0	0	0	0	1	moderate
69	no	F	yes	no	no	yes	no	no	no	no	no	no	no	5.1	no	no			no	no	no	no	no	no	no	yes	no	no	no	no	no	no	no	no	no	no	no	no	1	0	0	0	0	1	moderate
92	no	F	yes	yes	no	no	no	no	no	no	no	no	yes	2.6	no	yes	1.32	no	yes	yes	no	no	no	no	no	yes	no	no	yes	no	no	no	no	no	no	no	no	no	1	2	-2	0	0	1	moderate
80	no	F	yes	no	no	yes	yes	no	no	no	no	no	yes	12.9	no	yes	6.7	yes	no	yes	yes	no	no	no	no	no	no	no	no	no	no	no	no	no	no	no	no	no	1	2	-2	0	0	1	moderate
66	no	F	yes	yes	no	no	no	no	no	no	no	no	yes	1.9	no	yes	3.14	yes	no	yes	no	no	no	yes	no	no	no	no	no	no	no	no	no	no	no	no	no	no	1	2	-2	0	0	1	moderate
80	no	F	yes	no	no	no	no	no	no	no	no	no	yes	4.7	no	yes	1.9	no	yes	no	no	no	no	yes	no	no	no	no	no	no	no	no	no	no	no	no	no	no	1	2	-2	0	0	1	moderate
91	no	F	yes	no	no	no	no	no	no	no	no	no	yes	5.7	no	yes	0.5	no	no	yes	no	no	yes	yes	no	no	no	no	no	no	no	no	no	no	no	no	no	no	1	2	-2	0	0	1	moderate
91	no	F	yes	no	no	no	no	no	no	no	no	no	yes	1.7	no	yes	0	no	no	no	no	no	no	no	no	yes	no	yes	no	no	no	no	no	no	no	no	no	no	1	2	-2	0	0	1	moderate
61	no	F	yes	no	no	yes	yes	no	no	no	no	no	yes	1.2	yes	yes	5.5	yes	no	yes	no	no	no	no	no	yes	no	no	yes	no	no	no	no	no	no	no	no	no	1	2	-2	0	0	1	moderate
68	no	F	yes	no	no	yes	no	no	no	no	yes	no	no	0.6	yes	yes			no	no	no	no	no	no	no	no	no	no	no	no	no	yes	no	no	no	no	no	no	1	0	-2	2	0	1	moderate
86	no	F	yes	no	no	no	no	no	R-Y	yes	no	no	no	0.6	yes	no	0	no	no	no	no	no	no	no	no	no	no	no	no	no	no	no	no	no	no	no	no	no	1	0	0	0	0	1	moderate
80	no	F	yes	no	no	yes	no	no	no	no	no	no	no	6.01	no	no	0	no	no	no	no	yes	no	no	no	yes	no	no	no	no	no	no	no	no	no	no	no	no	1	0	0	0	0	1	moderate
78	no	F	yes	no	no	yes	no	no	no	no	no	no	no	0.5	yes	no	1.9	no	yes	no	no	yes	no	yes	no	no	no	no	no	no	no	no	no	no	no	no	no	no	1	0	0	0	0	1	moderate
80	no	F	yes	no	no	yes	no	no	no	no	no	no	no	0.7	yes	no	2.1	no	yes	yes	no	yes	no	yes	no	yes	no	yes	no	no	no	no	no	no	no	no	no	no	1	0	0	0	0	1	moderate
79	no	F	yes	no	no	yes	no	no	R-Y	yes	no	no	no	1.57	no	no			no	no	no	yes	no	yes	no	no	no	no	no	no	no	no	no	no	no	no	no	no	1	0	0	0	0	1	moderate
82	no	M	no	no	no	yes	no	no	B-I	yes	no	no	yes	0.6	yes	no	3.1	yes	yes	yes	no	no	no	yes	no	no	no	no	no	no	no	no	no	no	no	no	no	no	0	2	0	0	0	2	moderate
86	no	M	no	no	yes	no	no	no	B-I	yes	yes	no	yes	2.2	no	no	6.9	yes	no	yes	no	no	no	no	no	yes	no	yes	no	no	no	no	no	no	no	no	no	no	0	2	0	0	0	2	moderate
88	no	M	no	no	no	no	no	no	B-I	yes	no	no	yes	5.9	no	no			no	yes	no	no	no	yes	no	no	no	no	no	no	no	no	no	no	no	no	no	no	0	2	0	0	0	2	moderate
90	no	M	no	no	no	no	no	no	B-II	yes	no	no	yes	0.9	yes	no	3.7	yes	no	no	no	no	no	no	no	yes	no	yes	no	no	no	no	no	no	no	no	no	no	0	2	0	0	0	2	moderate
65	no	M	no	no	no	yes	no	no	B-II	yes	no	no	yes	1.2	yes	no	3.3	yes	yes	yes	no	no	yes	yes	no	no	no	no	no	no	no	no	no	no	no	no	no	no	0	2	0	0	0	2	moderate
72	no	M	no	no	no	yes	no	no	B-II	yes	no	no	yes	0.7	yes	no	2.5	no	no	yes	no	no	no	no	no	yes	no	no	yes	no	no	no	no	no	no	no	no	no	0	2	0	0	0	2	moderate
79	no	M	no	no	no	yes	no	no	B-II	yes	no	no	yes	2.9	no	no	2.9	no	no	no	no	no	no	no	no	yes	no	yes	no	no	no	no	no	no	no	no	no	no	0	2	0	0	0	2	moderate
88	no	M	no	no	no	no	no	no	B-II	yes	no	no	yes	0.9	yes	no	3.2	yes	yes	yes	no	no	yes	yes	no	no	no	no	no	no	no	no	no	no	no	no	no	no	0	2	0	0	0	2	moderate
81	no	M	no	no	no	yes	no	no	no	no	no	no	yes	0.84	yes	no	1	no	no	no	yes	no	no	yes	no	no	no	no	no	no	no	no	no	no	no	no	no	no	0	2	0	0	0	2	moderate
73	no	M	no	yes	yes	no	no	no	no	no	yes	no	yes	2.6	no	no	1.51	no	no	yes	no	no	no	no	no	no	no	no	no	no	no	no	no	no	no	no	no	no	0	2	0	0	0	2	moderate
69	no	M	no	no	no	yes	no	no	no	no	no	no	yes	0.45	yes	no	1	no	yes	yes	no	no	no	no	no	no	no	no	no	no	no	no	no	no	no	no	no	no	0	2	0	0	0	2	moderate
88	no	M	no	no	no	yes	no	no	no	no	no	no	yes	0.44	yes	no	3.6	yes	no	yes	no	no	no	yes	no	no	no	no	no	no	no	no	no	no	no	no	no	no	0	2	0	0	0	2	moderate
68	no	M	no	no	no	no	no	no	no	no	no	no	yes	0.6	yes	no	2.64	no	no	no	yes	no	no	no	no	no	no	no	no	no	no	no	no	no	no	no	no	no	0	2	0	0	0	2	moderate
64	no	M	no	no	no	yes	yes	no	no	no	no	no	yes	2.05	no	no	2.2	no	no	yes	no	no	no	no	no	yes	no	yes	no	no	no	no	no	no	no	no	no	no	0	2	0	0	0	2	moderate
92	no	M	no	yes	yes	no	no	no	no	no	no	no	yes	1.6	no	no	2.91	no	no	yes	no	no	no	yes	no	no	no	no	no	no	no	no	no	no	no	no	no	no	0	2	0	0	0	2	moderate
74	no	M	no	no	no	no	no	no	no	no	no	no	yes	7.4	no	no	1.6	no	no	no	no	no	no	no	no	yes	no	yes	no	no	no	no	no	no	no	no	no	no	0	2	0	0	0	2	moderate
86	no	M	no	no	no	yes	no	no	no	no	no	no	yes			no	2.2	no	no	yes	no	no	yes	yes	no	yes	no	no	no	no	no	no	no	no	no	no	no	no	0	2	0	0	0	2	moderate
79	no	M	no	no	no	yes	no	no	no	no	no	no	yes	1.3	no	no	2.9	no	yes	yes	no	no	no	yes	no	no	no	no	no	no	no	no	no	no	no	no	no	no	0	2	0	0	0	2	moderate
73	no	M	no	no	no	no	no	no	no	no	no	no	yes	6.4	no	no	1.9	no	no	no	no	no	no	no	no	yes	no	yes	no	no	no	no	no	no	no	no	no	no	0	2	0	0	0	2	moderate
79	no	M	no	no	no	yes	no	no	no	no	no	no	yes	1.04	yes	no	3	no	yes	yes	no	no	no	yes	no	no	no	no	no	no	no	no	no	no	no	no	no	no	0	2	0	0	0	2	moderate
72	no	M	no	no	no	yes	no	no	no	no	no	no	yes	0.7	yes	no	2.3	no	yes	yes	no	no	yes	yes	no	no	no	no	no	no	no	no	no	no	no	no	no	no	0	2	0	0	0	2	moderate
56	no	M	no	yes	no	no	no	no	no	no	no	no	yes	3.2	no	no	1.13	no	no	yes	no	no	no	yes	no	no	no	no	no	no	no	no	no	no	no	no	no	no	0	2	0	0	0	2	moderate
75	no	M	no	no	no	yes	no	no	no	no	no	no	yes	4.19	no	no	1.3	no	no	yes	no	no	no	no	no	yes	no	yes	no	no	no	no	no	no	no	no	no	no	0	2	0	0	0	2	moderate
91	no	M	no	yes	no	no	no	no	no	no	no	no	yes	0.8	yes	no	2.67	no	no	no	no	no	no	no	no	no	no	no	no	no	no	no	no	no	no	no	no	no	0	2	0	0	0	2	moderate
66	no	M	no	no	no	no	no	no	no	no	no	no	yes	20.9	no	no	3.96	yes	no	yes	no	no	no	no	no	yes	no	yes	no	no	no	no	no	no	no	no	no	no	0	2	0	0	0	2	moderate
66	no	M	no	no	no	yes	no	no	no	no	no	no	yes	1.12	yes	no	2.5	no	yes	yes	no	no	yes	yes	no	no	no	no	no	no	no	no	no	no	no	no	no	no	0	2	0	0	0	2	moderate
68	no	M	no	no	yes	no	no	no	no	no	yes	no	yes	18.6	no	no	2.3	no	no	yes	yes	no	no	yes	no	no	no	no	no	no	no	no	no	no	no	no	no	no	0	2	0	0	0	2	moderate
87	no	M	no	no	no	no	no	no	no	no	no	no	yes	0.7	yes	no	2.86	no	no	yes	no	no	no	yes	no	no	no	no	no	no	no	no	no	no	no	no	no	no	0	2	0	0	0	2	moderate
67	no	M	no	no	no	yes	no	no	no	no	no	no	yes	11.59	no	no	1	no	no	yes	no	no	no	no	no	yes	no	no	no	no	no	no	no	no	no	no	no	no	0	2	0	0	0	2	moderate
68	no	M	no	no	no	yes	no	no	no	no	no	no	yes	5.18	no	no	3	no	yes	yes	no	no	no	yes	no	no	no	no	no	no	no	no	no	no	no	no	no	no	0	2	0	0	0	2	moderate
66	no	M	no	no	no	no	no	no	no	no	no	no	yes	25.2	no	no	1	no	yes	yes	no	no	no	no	no	yes	no	yes	no	no	no	no	no	no	no	no	no	no	0	2	0	0	0	2	moderate
69	no	M	no	no	no	no	no	no	no	no	no	no	yes	2.2	no	no	1.1	no	no	yes	no	no	no	no	no	no	no	no	no	no	no	no	no	no	no	no	no	no	0	2	0	0	0	2	moderate
87	no	M	no	no	no	yes	no	no	no	no	no	no	yes	5.12	no	no			no	no	no	no	no	no	no	yes	no	no	yes	no	no	no	no	no	no	no	no	no	0	2	0	0	0	2	moderate
61	no	M	no	no	no	no	no	no	no	no	no	no	yes	31.7	no	no	1	no	no	yes	no	no	no	no	no	yes	yes	no	yes	no	no	no	no	no	no	no	no	no	0	2	0	0	0	2	moderate
72	no	M	no	no	no	yes	yes	no	no	no	no	yes	yes	20.48	no	no	4	yes	no	yes	no	no	no	no	no	yes	no	no	no	no	no	no	no	no	no	no	no	no	0	2	0	0	0	2	moderate
59	no	M	no	no	yes	yes	no	no	no	no	no	no	yes	3.88	no	no	1.5	no	no	no	no	no	no	no	no	yes	no	yes	no	no	no	no	no	no	no	no	no	no	0	2	0	0	0	2	moderate
80	no	M	no	no	no	yes	no	no	no	no	no	no	yes	3.1	no	no	1	no	no	yes	no	no	no	no	no	no	no	no	no	no	no	no	no	no	no	no	no	no	0	2	0	0	0	2	moderate
63	no	M	no	no	no	yes	no	no	no	no	no	no	yes	0.46	yes	no	2.9	no	no	yes	no	no	no	yes	no	no	no	no	no	no	no	no	no	no	no	no	no	no	0	2	0	0	0	2	moderate
75	no	M	no	no	no	yes	yes	no	no	no	no	no	yes	1.25	no	no	4	yes	no	no	no	no	no	no	no	yes	no	yes	no	no	no	no	no	no	no	no	no	no	0	2	0	0	0	2	moderate
84	no	M	no	no	no	yes	no	no	no	no	no	no	yes	13.8	no	no	2.4	no	no	no	no	no	no	no	no	yes	no	yes	no	no	no	no	no	no	no	no	no	no	0	2	0	0	0	2	moderate
80	no	M	no	no	no	no	no	no	no	no	no	no	yes	1	yes	no	2.6	no	no	yes	no	no	no	no	no	yes	no	no	yes	no	no	no	no	no	no	no	no	no	0	2	0	0	0	2	moderate
80	no	M	no	no	no	no	no	no	no	no	no	no	yes	1	yes	no	2.6	no	no	no	no	no	no	no	no	no	no	no	no	no	no	no	no	no	no	no	no	no	0	2	0	0	0	2	moderate
68	no	M	no	no	no	no	no	no	no	no	no	no	yes	2.7	no	no	1.3	no	yes	yes	no	no	no	yes	no	no	no	no	no	no	no	no	no	no	no	no	no	no	0	2	0	0	0	2	moderate
66	no	M	no	no	no	yes	no	no	no	no	no	no	yes	4.6	no	no	3.4	yes	no	no	no	no	no	no	no	yes	no	no	no	no	no	no	no	no	no	no	no	no	0	2	0	0	0	2	moderate
50	no	M	no	no	yes	no	no	no	no	no	no	no	yes	3.8	no	no	0.5	no	yes	yes	no	no	no	yes	no	no	no	no	no	no	no	no	no	no	no	no	no	no	0	2	0	0	0	2	moderate
74	no	M	no	no	yes	no	yes	no	no	no	no	no	yes	29.5	no	no	2.4	no	no	yes	no	no	no	no	no	yes	no	yes	no	no	no	no	no	no	no	no	no	no	0	2	0	0	0	2	moderate
86	no	M	no	no	no	no	no	no	no	no	no	no	yes	2.8	no	no	1	no	no	yes	no	no	no	yes	no	no	no	no	no	no	no	no	no	no	yes	yes	no	no	0	2	0	0	0	2	moderate
67	no	M	no	no	no	no	no	no	no	no	no	no	yes	1.7	no	no	1	no	no	yes	no	no	no	yes	no	no	no	no	no	no	no	no	no	no	no	no	no	no	0	2	0	0	0	2	moderate
68	no	M	no	no	no	yes	no	no	no	no	no	no	yes	0.78	yes	no	2.2	no	no	yes	no	no	no	no	no	no	no	no	no	no	no	no	no	no	no	no	no	no	0	2	0	0	0	2	moderate
70	no	M	no	no	no	no	no	no	no	no	no	no	yes	34.3	no	no	0.5	no	no	yes	no	no	no	no	no	yes	no	yes	no	no	no	no	no	no	no	no	no	no	0	2	0	0	0	2	moderate
58	no	M	no	no	no	no	yes	no	no	no	no	no	yes	8.86	no	no	2.1	no	no	yes	no	no	no	no	no	yes	yes	no	yes	no	no	no	no	no	no	no	no	no	0	2	0	0	0	2	moderate
91	no	M	no	no	no	yes	no	no	no	no	no	no	yes	5.47	no	no	0	no	no	yes	no	no	no	yes	no	no	no	no	no	no	no	no	no	no	no	no	no	no	0	2	0	0	0	2	moderate
59	no	M	no	no	no	no	no	no	no	no	no	no	yes	3.86	no	no	1.8	no	yes	no	no	no	no	no	no	yes	no	yes	no	no	no	no	no	no	no	no	no	no	0	2	0	0	0	2	moderate
67	no	M	no	no	yes	no	no	no	no	no	yes	no	yes	3	no	no			no	yes	yes	no	no	no	no	no	no	no	no	no	no	no	no	no	no	no	no	no	0	2	0	0	0	2	moderate
93	no	M	no	no	yes	no	no	no	no	no	no	no	yes	4.1	no	no	0.5	no	yes	yes	no	no	yes	yes	no	no	no	no	no	no	no	no	no	no	no	no	no	no	0	2	0	0	0	2	moderate
52	no	M	no	no	yes	no	no	no	no	no	no	no	yes	2.3	no	no	0.7	no	no	yes	no	no	no	no	no	no	no	no	no	no	no	no	no	no	no	no	no	no	0	2	0	0	0	2	moderate
86	no	M	no	no	no	yes	no	no	no	no	no	no	yes	9	no	no	1.1	no	yes	no	no	no	no	no	no	yes	no	yes	no	no	no	no	no	no	no	no	no	no	0	2	0	0	0	2	moderate
75	no	M	no	no	no	no	no	no	no	no	no	no	yes	0.5	yes	no	2.1	no	no	yes	no	no	no	yes	no	no	no	no	no	no	no	no	no	no	no	no	no	no	0	2	0	0	0	2	moderate
84	no	M	no	no	no	no	no	no	no	no	no	no	yes	1.4	no	no	2.4	no	yes	yes	no	no	no	yes	no	no	no	no	no	no	no	no	no	no	no	no	no	no	0	2	0	0	0	2	moderate
87	no	M	no	no	no	yes	no	no	no	no	no	no	yes	0.76	yes	no	0	no	no	no	no	no	no	no	no	yes	no	yes	no	no	no	no	no	no	no	no	no	no	0	2	0	0	0	2	moderate
74	no	M	no	no	no	no	yes	no	no	no	no	no	yes	12.2	no	no	11.1	yes	no	yes	no	no	no	no	no	yes	no	no	yes	no	no	no	no	no	no	no	no	no	0	2	0	0	0	2	moderate
79	no	M	no	no	no	no	no	no	no	no	no	no	yes	4.6	no	no	2.1	no	no	yes	no	no	no	yes	no	no	no	no	no	no	no	no	no	no	no	no	no	no	0	2	0	0	0	2	moderate
71	no	M	no	no	no	yes	yes	no	no	no	no	no	yes	0.49	yes	no	0	no	no	no	no	no	no	no	no	yes	no	yes	no	no	no	no	no	no	no	no	no	no	0	2	0	0	0	2	moderate
63	no	M	no	no	no	yes	no	no	no	no	no	no	yes	2.82	no	no	1.4	no	no	yes	no	no	no	no	no	no	no	no	no	no	no	no	no	no	no	no	no	no	0	2	0	0	0	2	moderate
72	no	M	no	no	no	yes	no	no	no	no	no	no	yes	12.96	no	no	2.3	no	no	no	no	no	no	no	no	yes	no	no	no	no	no	no	no	no	no	no	no	no	0	2	0	0	0	2	moderate
69	no	M	no	no	yes	no	no	no	no	no	no	no	yes	1.7	no	no	0.5	no	no	yes	no	no	no	yes	no	no	no	no	no	no	no	no	no	no	no	no	no	no	0	2	0	0	0	2	moderate
91	no	M	no	no	no	yes	yes	no	no	no	yes	no	yes	6.81	no	no	16.4	yes	no	yes	no	no	no	no	no	yes	no	yes	no	no	no	no	no	no	no	no	no	no	0	2	0	0	0	2	moderate
81	no	M	no	no	no	yes	no	no	no	no	no	no	yes	4.79	no	no	1.5	no	no	yes	no	no	no	no	no	yes	yes	yes	no	no	no	no	no	no	no	no	no	no	0	2	0	0	0	2	moderate
72	no	M	no	no	no	no	no	no	no	no	no	no	yes	0.9	yes	no	1.1	no	no	yes	no	no	no	yes	no	no	no	no	no	no	no	no	no	no	no	no	no	no	0	2	0	0	0	2	moderate
79	no	M	no	no	no	yes	no	no	no	no	no	no	yes	22.41	no	no	0	no	no	yes	no	no	no	no	no	yes	yes	yes	no	no	no	no	no	no	no	no	no	no	0	2	0	0	0	2	moderate
83	no	M	no	no	no	no	no	no	no	no	no	no	yes	13.4	no	no	1.9	no	no	yes	no	no	no	no	no	yes	no	no	yes	no	no	no	no	no	yes	yes	no	no	0	2	0	0	0	2	moderate
74	no	M	no	no	yes	no	no	no	no	no	no	no	yes	3.1	no	no	0.5	no	yes	yes	no	no	yes	yes	no	no	no	no	no	no	no	no	no	no	no	no	no	no	0	2	0	0	0	2	moderate
78	no	M	no	no	yes	yes	no	no	no	no	no	no	yes	10.97	no	no	2	no	no	yes	no	no	no	no	no	yes	no	yes	no	no	no	no	no	no	no	no	no	no	0	2	0	0	0	2	moderate
73	no	M	no	no	no	yes	no	no	no	no	no	no	yes	21.11	no	no	3	no	no	no	no	no	no	no	no	yes	no	yes	no	no	no	no	no	no	no	no	no	no	0	2	0	0	0	2	moderate
77	no	M	no	no	no	yes	no	no	no	no	no	no	yes	11.37	no	no	3.5	yes	no	yes	no	no	no	yes	no	yes	no	no	no	no	no	no	no	no	no	no	no	no	0	2	0	0	0	2	moderate
94	no	M	no	no	no	no	no	no	no	no	no	no	yes	0.75	yes	no	1.9	no	no	yes	no	no	no	yes	no	no	no	no	no	no	no	no	no	no	no	no	no	no	0	2	0	0	0	2	moderate
69	no	M	no	no	no	yes	no	no	no	no	no	no	yes	1.95	no	no	1.3	no	no	no	no	no	no	no	no	yes	no	no	no	no	no	no	no	no	no	no	no	no	0	2	0	0	0	2	moderate
73	no	M	no	no	no	no	no	no	no	no	no	no	yes	5.7	no	no	2.5	no	no	yes	no	no	no	yes	no	yes	no	yes	no	no	no	no	no	no	no	no	no	no	0	2	0	0	0	2	moderate
74	no	M	no	no	yes	yes	yes	no	no	no	no	no	yes	13.1	no	no	9	yes	no	no	no	no	no	no	no	yes	no	yes	no	no	no	no	no	no	no	no	no	no	0	2	0	0	0	2	moderate
72	no	M	no	no	no	yes	no	no	no	no	no	no	yes	27.67	no	no	0	no	no	yes	no	no	no	no	no	no	no	no	no	no	no	no	no	no	no	no	no	no	0	2	0	0	0	2	moderate
91	no	M	no	no	no	no	no	no	no	no	no	no	yes	0.75	yes	no	1	no	yes	yes	no	no	no	yes	no	no	no	no	no	no	no	no	no	no	no	no	no	no	0	2	0	0	0	2	moderate
64	no	M	no	no	no	yes	no	no	no	no	no	no	yes	3.14	no	no	3.5	yes	no	yes	no	no	no	no	no	yes	no	yes	no	no	no	no	no	no	no	no	no	no	0	2	0	0	0	2	moderate
87	no	M	no	no	no	no	no	no	no	no	no	no	yes	0.7	yes	no	1.1	no	yes	yes	no	no	yes	yes	no	no	no	no	no	no	no	no	no	no	no	no	no	no	0	2	0	0	0	2	moderate
62	no	M	no	no	no	no	no	no	no	no	no	no	yes	1.3	no	no	2.5	no	no	no	no	no	no	no	no	yes	no	yes	no	no	no	no	no	no	no	no	no	no	0	2	0	0	0	2	moderate
79	no	M	no	no	no	yes	no	no	no	no	no	no	yes	4.8	no	no	3.1	yes	no	no	no	no	no	no	no	yes	no	no	no	no	no	no	no	no	no	no	no	no	0	2	0	0	0	2	moderate
84	no	M	no	no	no	no	no	no	no	no	no	no	yes	1.55	no	no	1.7	no	no	no	no	no	no	no	no	yes	no	yes	no	no	no	no	no	no	no	no	no	no	0	2	0	0	0	2	moderate
80	no	M	no	no	no	no	no	no	no	no	no	no	yes	5.05	no	no	1.4	no	no	no	no	no	no	no	no	yes	no	yes	no	no	no	no	no	no	no	no	no	no	0	2	0	0	0	2	moderate
81	no	M	no	no	no	yes	no	no	no	no	no	no	yes	3.4	no	no	1.9	no	no	no	no	no	no	no	no	yes	yes	yes	no	no	no	no	no	no	no	no	no	no	0	2	0	0	0	2	moderate
69	no	M	no	no	no	no	no	no	no	no	no	no	yes	9.93	no	no	2.3	no	no	yes	no	no	no	no	no	yes	no	yes	no	no	no	no	no	no	no	no	no	no	0	2	0	0	0	2	moderate
65	no	M	no	no	no	yes	yes	no	no	no	no	no	yes	11.5	no	no	8.3	yes	no	no	no	no	no	no	no	yes	no	no	yes	no	no	no	no	no	yes	yes	no	no	0	2	0	0	0	2	moderate
84	no	M	no	no	no	yes	no	no	no	no	no	no	yes	0.72	yes	no	2.9	no	no	yes	no	no	no	yes	no	no	no	no	no	no	no	no	no	no	no	no	no	no	0	2	0	0	0	2	moderate
73	no	M	no	no	no	no	no	no	no	no	no	no	yes	0.52	yes	no	1.9	no	yes	yes	no	no	no	yes	no	no	no	no	no	no	no	no	no	no	no	no	no	no	0	2	0	0	0	2	moderate
69	no	M	no	no	no	yes	no	no	no	no	no	no	yes	8.25	no	no	2.7	no	yes	no	no	no	no	no	no	yes	no	yes	no	no	no	no	no	no	no	no	no	no	0	2	0	0	0	2	moderate
75	no	M	no	no	no	yes	no	no	no	no	no	no	yes	3.94	no	no	1.9	no	no	yes	no	no	no	no	no	yes	no	yes	no	no	no	no	no	no	no	no	no	no	0	2	0	0	0	2	moderate
76	no	M	no	no	no	yes	no	no	no	no	no	no	yes	1.5	no	no	1.1	no	no	yes	no	no	no	no	no	yes	no	yes	no	no	no	no	no	no	no	no	no	no	0	2	0	0	0	2	moderate
93	no	M	no	no	no	no	no	no	no	no	no	no	yes	13.13	no	no	2.6	no	no	no	no	no	no	no	no	yes	no	yes	no	no	no	no	no	no	no	no	no	no	0	2	0	0	0	2	moderate
63	no	M	no	no	no	yes	no	no	no	no	no	no	yes	0.32	yes	no			no	yes	no	no	no	yes	no	no	no	no	no	no	no	no	no	no	no	no	no	no	0	2	0	0	0	2	moderate
63	no	M	no	no	no	yes	no	no	no	no	no	no	yes	0.65	yes	no	3.7	yes	no	yes	no	no	no	no	no	yes	no	yes	no	no	no	no	no	no	no	no	no	no	0	2	0	0	0	2	moderate
74	no	M	no	no	no	no	no	no	no	no	no	no	yes	0.54	yes	no	1.8	no	yes	yes	no	no	no	yes	no	no	no	no	no	no	no	no	no	no	no	no	no	no	0	2	0	0	0	2	moderate
56	no	M	no	no	no	yes	no	no	no	no	no	no	yes	1.1	yes	no			no	yes	no	no	no	yes	no	no	no	no	no	no	no	no	no	no	no	no	no	no	0	2	0	0	0	2	moderate
71	no	M	no	no	no	no	no	no	no	no	no	no	yes	7.37	no	no	1.1	no	yes	yes	no	no	no	yes	no	no	no	no	no	no	no	no	no	no	no	no	no	no	0	2	0	0	0	2	moderate
82	no	M	no	no	no	no	no	no	no	no	yes	no	yes	0.5	yes	no	0	no	no	yes	no	no	no	yes	no	no	no	no	no	no	no	no	no	no	no	no	no	no	0	2	0	0	0	2	moderate
79	no	M	no	no	no	yes	no	no	no	no	no	no	yes	1.5	no	no	1.7	no	no	no	no	no	no	no	no	yes	no	yes	no	no	no	no	no	no	no	no	no	no	0	2	0	0	0	2	moderate
64	no	M	no	no	no	yes	no	no	no	no	no	no	yes	2.2	no	no	1.7	no	yes	yes	no	no	no	yes	no	no	no	no	no	no	no	no	no	no	no	no	no	no	0	2	0	0	0	2	moderate
71	no	M	no	no	no	yes	no	no	no	no	no	no	yes	0.82	yes	no	2.3	no	no	yes	no	no	no	no	no	yes	no	no	no	no	no	no	no	no	no	no	no	no	0	2	0	0	0	2	moderate
53	no	M	no	no	no	no	no	no	no	no	no	no	yes	10.6	no	no	0	no	no	no	no	no	no	no	no	yes	no	yes	no	no	no	no	no	no	no	no	no	no	0	2	0	0	0	2	moderate
88	no	M	no	no	no	no	no	no	no	no	no	no	yes	0.6	yes	no	0	no	no	yes	no	no	no	yes	no	no	no	no	no	no	no	no	no	no	no	no	no	no	0	2	0	0	0	2	moderate
82	no	M	no	no	no	no	no	no	no	no	no	no	yes	16.5	no	no	2.3	no	no	yes	no	no	no	no	no	yes	no	yes	no	no	no	no	no	no	no	no	no	no	0	2	0	0	0	2	moderate
75	no	M	no	no	no	no	yes	no	no	no	no	no	yes	8.1	no	no	6.7	yes	no	yes	no	no	no	no	no	yes	no	yes	no	no	no	no	no	no	no	no	no	no	0	2	0	0	0	2	moderate
81	no	M	no	no	no	no	no	no	no	no	no	no	yes	11.4	no	no	8.1	yes	no	no	no	no	no	no	no	yes	no	yes	no	no	no	no	no	no	no	no	no	no	0	2	0	0	0	2	moderate
74	no	M	no	no	no	yes	no	no	no	no	no	no	yes	0.6	yes	no	2.9	no	no	yes	no	no	no	yes	no	no	no	no	no	no	no	no	no	no	no	no	no	no	0	2	0	0	0	2	moderate
83	no	M	no	no	no	yes	no	no	no	no	no	no	yes	0.8	yes	no	4.4	yes	yes	yes	no	no	yes	yes	no	no	no	no	no	no	no	no	no	no	no	no	no	no	0	2	0	0	0	2	moderate
83	no	M	no	no	no	yes	no	no	no	no	no	no	yes	0.6	yes	no	1.9	no	no	yes	no	no	no	yes	no	no	no	no	no	no	no	no	no	no	no	no	no	no	0	2	0	0	0	2	moderate
72	no	M	no	no	no	yes	no	no	no	no	no	no	yes	1.5	no	no	1.4	no	yes	yes	no	no	yes	yes	no	no	no	no	no	no	no	no	no	no	no	no	no	no	0	2	0	0	0	2	moderate
80	no	M	no	no	no	yes	no	no	no	no	no	no	yes	2.7	no	no	1.5	no	yes	yes	no	no	yes	yes	no	no	no	no	no	no	no	no	no	no	no	no	no	no	0	2	0	0	0	2	moderate
62	no	M	no	no	no	yes	no	no	no	no	no	no	yes	0.7	yes	no	1.4	no	no	yes	no	no	yes	yes	no	no	no	no	no	no	no	no	no	no	no	no	no	no	0	2	0	0	0	2	moderate
86	no	M	no	no	no	yes	no	no	no	no	no	no	yes	1.3	no	no	2.1	no	yes	yes	no	no	no	yes	no	no	no	no	no	no	no	no	no	no	no	no	no	no	0	2	0	0	0	2	moderate
86	no	M	no	no	no	yes	no	no	no	no	no	no	yes	1.3	no	no	2	no	yes	yes	no	no	no	yes	no	no	no	no	no	no	no	no	no	no	no	no	no	no	0	2	0	0	0	2	moderate
45	yes	M	no	no	no	yes	no	no	no	no	no	no	yes	0.9	yes	no	1.5	no	no	yes	no	no	no	yes	no	no	no	no	no	no	no	no	no	no	no	no	no	no	0	2	0	0	0	2	moderate
66	no	M	no	no	no	yes	no	no	no	no	no	no	yes	4.1	no	no	2	no	yes	yes	no	no	yes	yes	no	no	no	no	no	no	no	no	no	no	no	no	no	no	0	2	0	0	0	2	moderate
70	no	M	no	no	no	yes	no	no	no	no	yes	no	yes	0.7	yes	no	1.8	no	no	yes	no	no	yes	yes	no	no	no	no	no	no	no	no	no	no	no	no	no	no	0	2	0	0	0	2	moderate
54	no	M	no	no	no	yes	no	no	no	no	no	no	yes	2.4	no	no	1.3	no	no	yes	no	no	no	yes	no	no	no	no	no	no	no	no	no	no	no	no	no	no	0	2	0	0	0	2	moderate
88	no	M	no	no	no	yes	no	no	no	no	no	no	yes	1.3	no	no	1	no	yes	yes	no	no	no	yes	no	no	no	no	no	no	no	no	no	no	no	no	no	no	0	2	0	0	0	2	moderate
66	no	M	no	no	no	yes	yes	no	no	no	no	no	yes	1.3	no	no	1.9	no	no	yes	no	no	no	no	no	yes	no	no	yes	no	no	no	no	no	no	no	no	no	0	2	0	0	0	2	moderate
62	no	M	no	no	no	yes	yes	no	no	no	no	no	yes	28.8	no	no	1	no	no	yes	no	no	no	no	no	yes	no	yes	no	no	no	no	no	no	no	no	no	no	0	2	0	0	0	2	moderate
77	no	M	no	no	no	yes	no	no	no	no	no	no	yes	0.4	yes	no	1	no	no	yes	no	no	no	no	no	yes	no	yes	no	no	no	no	no	no	no	no	no	no	0	2	0	0	0	2	moderate
77	no	M	no	no	no	yes	no	no	no	no	no	no	yes	11.3	no	no	1	no	no	yes	no	no	no	no	no	yes	yes	no	yes	no	no	no	no	no	no	no	no	no	0	2	0	0	0	2	moderate
83	no	M	no	no	no	yes	yes	no	no	no	no	no	yes	25.8	no	no	11.1	yes	no	yes	no	no	no	no	no	yes	no	no	yes	no	no	no	no	no	no	no	no	no	0	2	0	0	0	2	moderate
86	no	M	no	no	no	yes	no	no	no	no	no	no	yes	19.1	no	no	1.6	no	no	yes	no	no	no	no	no	yes	no	yes	no	no	no	no	no	no	no	no	no	no	0	2	0	0	0	2	moderate
77	no	M	no	no	no	yes	no	no	no	no	no	no	yes	12.6	no	no	3	no	no	yes	no	no	no	no	no	yes	no	yes	no	no	no	no	no	no	no	no	no	no	0	2	0	0	0	2	moderate
83	no	M	no	no	no	yes	no	no	no	no	no	yes	yes	1.5	no	no	1	no	no	yes	no	no	no	no	no	yes	no	yes	no	no	no	no	no	no	no	no	no	no	0	2	0	0	0	2	moderate
82	no	M	no	no	no	yes	no	no	no	no	no	no	yes	10.4	no	no	1.7	no	no	no	no	no	no	no	no	yes	no	yes	no	no	no	no	no	no	yes	yes	no	no	0	2	0	0	0	2	moderate
78	no	M	no	no	no	yes	no	no	no	no	no	no	yes	5.5	no	no	1.6	no	yes	yes	no	no	no	yes	no	no	no	no	no	no	no	no	no	no	no	no	no	no	0	2	0	0	0	2	moderate
76	no	M	no	no	no	yes	no	no	no	no	no	no	yes	0.6	yes	no	1	no	yes	yes	no	no	no	yes	no	yes	no	yes	no	no	no	no	no	no	no	no	no	no	0	2	0	0	0	2	moderate
79	no	M	no	no	no	yes	no	no	no	no	yes	no	yes	1	yes	no	3	no	no	no	no	no	no	no	no	yes	no	yes	no	no	no	no	no	no	no	no	no	no	0	2	0	0	0	2	moderate
65	no	M	no	no	no	yes	no	no	no	no	no	no	yes	0.5	yes	no	2.6	no	no	no	no	no	no	no	no	no	no	no	no	no	no	no	no	no	no	no	no	no	0	2	0	0	0	2	moderate
77	no	M	no	no	no	yes	no	no	no	no	no	no	yes	0.7	yes	no	2.7	no	yes	yes	no	no	no	yes	no	no	no	no	no	no	no	no	no	no	no	no	no	no	0	2	0	0	0	2	moderate
73	no	M	no	no	no	yes	no	no	no	no	no	no	yes	5	no	no	1.4	no	no	yes	no	no	no	no	no	yes	yes	no	yes	no	no	no	no	no	no	no	no	no	0	2	0	0	0	2	moderate
77	no	M	no	no	no	no	no	no	no	no	no	no	yes	3.6	no	no	3.5	yes	yes	no	no	no	no	no	no	yes	no	yes	no	no	no	no	no	no	no	no	no	no	0	2	0	0	0	2	moderate
78	no	M	no	no	no	yes	no	no	no	no	no	no	yes	1.7	no	no	1.5	no	no	yes	no	no	yes	yes	no	no	no	no	no	no	no	no	no	no	no	no	no	no	0	2	0	0	0	2	moderate
79	no	M	no	no	no	yes	no	no	no	no	no	no	yes	2.9	no	no	2	no	no	yes	no	no	yes	yes	no	yes	no	no	yes	yes	no	no	no	no	no	no	no	no	0	2	0	0	0	2	moderate
75	no	M	no	no	no	yes	no	no	no	no	no	no	yes	0.6	yes	no	2.1	no	no	yes	no	no	no	yes	no	yes	no	yes	no	no	no	no	no	no	no	no	no	no	0	2	0	0	0	2	moderate
61	no	M	no	no	no	yes	yes	no	no	no	no	no	yes	5.9	no	no	1.5	no	no	yes	no	no	no	no	no	yes	no	no	yes	no	no	no	no	no	no	no	no	no	0	2	0	0	0	2	moderate
81	no	M	no	no	no	yes	no	no	no	no	no	no	yes	3.7	no	no	1	no	yes	yes	no	no	no	no	no	yes	no	yes	no	no	no	no	no	no	no	no	no	no	0	2	0	0	0	2	moderate
52	no	M	no	no	no	yes	no	no	no	no	no	no	yes	0.6	yes	no	1.2	no	no	yes	no	no	no	no	no	yes	no	no	no	no	no	no	no	no	no	no	no	no	0	2	0	0	0	2	moderate
66	no	M	no	no	no	yes	yes	no	no	no	no	no	yes	8.2	no	no	3.4	yes	no	yes	no	no	no	no	no	yes	no	yes	no	no	no	no	no	no	no	no	no	no	0	2	0	0	0	2	moderate
71	no	M	no	no	no	yes	no	no	no	no	no	no	yes	1.2	yes	no	2.3	no	no	no	no	no	no	no	no	no	no	no	no	no	no	no	no	no	no	no	no	no	0	2	0	0	0	2	moderate
77	no	M	no	no	no	yes	no	no	no	no	no	no	yes	1.9	no	no	1.6	no	no	yes	no	no	no	yes	no	no	no	no	no	no	no	no	no	no	no	no	no	no	0	2	0	0	0	2	moderate
68	no	M	no	no	no	yes	no	no	no	no	no	no	yes	9	no	no	1.9	no	yes	yes	no	no	no	no	no	yes	no	yes	no	no	no	no	no	no	no	no	no	no	0	2	0	0	0	2	moderate
57	no	M	no	no	no	yes	no	no	no	no	no	no	yes	0.8	yes	no	1.1	no	no	yes	yes	no	no	yes	no	no	no	no	no	no	no	no	no	no	no	no	no	no	0	2	0	0	0	2	moderate
71	no	M	no	no	no	yes	no	no	no	no	no	no	yes	1.1	yes	no	3.8	yes	no	yes	no	no	no	no	no	yes	no	yes	no	no	no	no	no	no	no	no	no	no	0	2	0	0	0	2	moderate
86	no	M	no	no	no	yes	no	no	no	no	no	no	yes	0.7	yes	no	1.7	no	no	yes	no	no	yes	yes	no	no	no	no	no	no	no	no	no	no	no	no	no	no	0	2	0	0	0	2	moderate
49	yes	M	no	no	no	yes	no	no	no	no	no	no	yes	8.6	no	no	1	no	no	no	no	no	no	no	no	yes	no	yes	no	no	no	no	no	no	no	no	no	no	0	2	0	0	0	2	moderate
76	no	M	no	no	no	yes	no	no	no	no	yes	no	no	0.83	yes	no	5	yes	no	no	no	no	no	no	no	no	no	no	no	no	no	yes	no	no	yes	no	yes	no	0	0	0	2	0	2	moderate
63	no	M	no	no	yes	yes	no	no	no	no	no	no	no	0.44	yes	no	3.6	yes	no	no	no	no	no	no	no	yes	no	yes	no	no	no	yes	no	no	no	no	no	no	0	0	0	2	0	2	moderate
53	no	M	no	yes	no	no	no	no	no	no	no	no	no	0.6	yes	no	2.57	no	no	no	no	no	no	no	no	no	no	no	no	no	no	yes	yes	no	no	no	no	no	0	0	0	2	0	2	moderate
50	no	M	no	no	yes	no	no	no	no	no	yes	no	no	1.72	no	no	6.7	yes	no	no	no	no	no	no	no	no	no	no	no	no	no	yes	yes	no	no	no	no	no	0	0	0	2	0	2	moderate
50	no	M	no	no	yes	no	no	no	no	no	yes	no	no	1.23	no	no	6.7	yes	no	no	no	no	no	no	no	no	no	no	no	no	no	yes	yes	no	no	no	no	no	0	0	0	2	0	2	moderate
46	yes	M	no	no	yes	no	no	no	no	no	yes	no	no	1	yes	no			no	no	no	no	no	no	no	no	no	no	no	no	no	yes	yes	no	no	no	no	no	0	0	0	2	0	2	moderate
52	no	M	no	no	no	no	no	no	no	no	yes	no	no	1.1	yes	no			no	no	no	no	no	no	no	no	no	no	no	no	no	yes	yes	no	no	no	no	no	0	0	0	2	0	2	moderate
79	no	M	no	no	no	yes	yes	no	no	no	no	no	no	0.79	yes	no	6.9	yes	yes	yes	no	no	no	yes	no	yes	no	yes	no	no	no	yes	yes	no	no	no	no	no	0	0	0	2	0	2	moderate
80	no	M	no	no	no	yes	no	no	no	no	no	no	no	0.9	yes	no	3.5	yes	no	no	no	no	no	no	no	no	no	no	no	no	no	yes	yes	no	no	no	no	no	0	0	0	2	0	2	moderate
44	yes	M	no	no	no	yes	no	no	no	no	no	no	yes	0.26	yes	yes	5	yes	no	yes	no	no	no	yes	no	no	no	no	no	no	no	yes	yes	no	no	no	no	no	0	2	-2	2	0	2	moderate
45	yes	M	no	no	no	yes	no	no	no	no	no	no	yes	0.6	yes	yes	3.1	yes	no	no	no	no	no	no	no	no	no	no	no	no	no	yes	yes	no	no	no	no	no	0	2	-2	2	0	2	moderate
56	no	M	no	no	no	yes	no	no	no	no	yes	no	yes	0.34	yes	yes	7	yes	yes	no	no	no	no	no	no	no	no	no	no	no	no	yes	yes	no	no	no	no	no	0	2	-2	2	0	2	moderate
56	no	M	no	no	no	yes	no	no	no	no	yes	no	yes	0.34	yes	yes	7	yes	yes	no	no	no	no	no	no	no	no	no	no	no	no	yes	yes	no	no	no	no	no	0	2	-2	2	0	2	moderate
56	no	M	no	no	no	yes	no	no	no	no	yes	no	yes	0.34	yes	yes	7	yes	yes	no	no	no	no	no	no	no	no	no	no	no	no	yes	yes	no	no	no	no	no	0	2	-2	2	0	2	moderate
48	yes	M	no	no	no	yes	no	no	no	no	yes	no	yes	0.25	yes	yes	5.4	yes	no	no	no	no	no	no	no	yes	no	yes	no	no	no	yes	yes	no	no	no	no	no	0	2	-2	2	0	2	moderate
59	no	M	no	no	no	no	no	no	no	no	yes	no	yes	1	yes	yes	5	yes	no	no	no	no	no	no	no	no	no	no	no	no	no	yes	yes	no	no	no	no	no	0	2	-2	2	0	2	moderate
63	no	M	no	no	no	yes	no	no	no	no	yes	no	yes	1.6	no	yes	7.7	yes	no	no	no	no	no	no	no	no	no	no	no	no	no	yes	yes	no	no	no	no	no	0	2	-2	2	0	2	moderate
63	no	M	no	no	no	yes	no	no	no	no	yes	no	yes	0.9	yes	yes	7.7	yes	no	no	no	no	no	no	no	no	no	no	no	no	no	yes	yes	no	no	no	no	no	0	2	-2	2	0	2	moderate
66	no	M	no	no	no	yes	no	no	no	no	no	no	yes	0.7	yes	yes	2.7	no	no	no	no	no	no	no	no	no	no	no	no	no	no	yes	yes	no	no	no	no	no	0	2	-2	2	0	2	moderate
79	no	M	no	no	no	yes	no	no	no	no	yes	no	yes	0.5	yes	yes	4.7	yes	yes	no	no	no	no	no	no	no	no	no	no	no	no	yes	yes	no	no	no	no	no	0	2	-2	2	0	2	moderate
78	no	M	no	no	no	yes	no	no	no	no	yes	no	yes	0.5	yes	yes	5.6	yes	yes	no	no	no	no	no	no	no	no	no	no	no	no	yes	yes	no	no	no	no	no	0	2	-2	2	0	2	moderate
81	no	M	no	no	no	yes	no	no	R-Y	yes	no	no	yes	0.32	yes	no			no	no	no	no	no	yes	no	yes	no	yes	no	no	no	no	no	no	no	no	no	no	0	2	0	0	0	2	moderate
71	no	M	no	no	no	yes	no	no	R-Y	yes	no	no	yes	4.34	no	no	3	no	no	no	no	no	no	no	no	yes	no	yes	no	no	no	no	no	no	yes	yes	no	no	0	2	0	0	0	2	moderate
71	no	M	no	no	no	no	no	no	R-Y	yes	no	no	yes	0.8	yes	no	6.4	yes	no	no	no	no	no	no	no	yes	no	yes	no	no	no	no	no	no	yes	yes	no	no	0	2	0	0	0	2	moderate
81	no	M	no	no	no	yes	no	no	R-Y	yes	no	no	yes	5.4	no	no	4.7	yes	no	yes	no	no	no	yes	no	no	no	no	no	no	no	no	no	no	no	no	no	no	0	2	0	0	0	2	moderate
87	no	M	no	no	no	yes	no	no	R-Y	yes	no	no	yes	30.4	no	no	3	no	no	yes	no	no	no	no	no	yes	no	yes	no	no	no	no	no	no	no	no	no	no	0	2	0	0	0	2	moderate
77	no	M	no	no	no	yes	yes	no	R-Y	yes	no	no	yes	0.4	yes	no	5.2	yes	no	yes	no	no	no	no	no	yes	no	no	yes	no	no	no	no	no	no	no	no	no	0	2	0	0	0	2	moderate
66	no	M	no	no	no	yes	no	no	no	no	no	no	no	0.5	yes	no	2.4	no	no	yes	no	no	no	yes	no	no	no	no	no	no	yes	yes	no	no	no	no	no	no	0	0	0	2	0	2	moderate
51	no	M	no	no	no	yes	no	no	no	no	no	no	no	1.4	no	no			no	yes	no	no	no	yes	no	no	no	no	no	no	yes	yes	no	no	no	no	no	no	0	0	0	2	0	2	moderate
67	no	M	no	no	no	no	yes	no	no	no	no	no	yes	0.4	yes	yes	5.5	yes	no	yes	no	no	no	no	no	yes	no	no	yes	no	yes	yes	no	no	no	no	no	no	0	2	-2	2	0	2	moderate
86	no	M	no	no	no	yes	no	no	B-II	yes	no	no	yes	1.1	yes	no	2.4	no	no	yes	yes	yes	no	yes	no	no	no	no	no	no	no	no	no	no	no	no	no	no	0	2	0	0	0	2	moderate
71	no	M	no	no	no	yes	no	no	Double tract	yes	no	no	yes	2.5	no	no	2.5	no	yes	yes	no	yes	no	yes	no	no	no	no	no	no	no	no	no	no	no	no	no	no	0	2	0	0	0	2	moderate
74	no	M	no	no	no	no	no	no	no	no	no	no	yes	1.9	no	no			no	yes	no	yes	no	yes	no	no	no	no	no	no	no	no	no	no	no	no	no	no	0	2	0	0	0	2	moderate
62	no	M	no	no	no	no	no	no	no	no	no	no	yes	0.7	yes	no	1.4	no	yes	no	no	yes	no	yes	no	no	no	no	no	no	no	no	no	no	no	no	no	no	0	2	0	0	0	2	moderate
91	no	M	no	no	yes	yes	no	no	no	no	no	no	yes	2.98	no	no			no	yes	no	yes	no	yes	no	yes	no	yes	no	no	no	no	no	no	no	no	no	no	0	2	0	0	0	2	moderate
89	no	M	no	no	no	yes	no	no	no	no	no	no	yes	0.8	yes	no	0	no	no	yes	no	yes	no	yes	no	yes	no	yes	no	no	no	no	no	no	no	no	no	no	0	2	0	0	0	2	moderate
65	no	M	no	no	no	yes	no	no	R-Y	yes	no	no	yes	3.9	no	no	1.2	no	no	yes	no	yes	no	yes	no	yes	no	yes	no	no	no	no	no	no	no	no	no	no	0	2	0	0	0	2	moderate
59	no	M	no	no	no	yes	no	no	R-Y	yes	no	no	yes	1.5	no	no	2.2	no	no	yes	no	yes	no	yes	no	no	no	no	no	no	no	no	no	no	no	no	no	no	0	2	0	0	0	2	moderate
61	no	M	no	no	no	yes	no	no	R-Y	yes	no	no	yes	11.7	no	no	1.6	no	no	yes	no	yes	no	no	no	yes	no	no	yes	no	no	no	no	no	no	no	no	no	0	2	0	0	0	2	moderate
79	no	M	no	no	no	yes	no	no	B-I	yes	no	no	yes	1.4	no	yes	1.4	no	no	yes	no	no	no	no	no	yes	no	yes	no	no	yes	yes	yes	yes	no	no	no	no	0	2	-2	2	0	2	moderate
79	no	M	no	no	no	no	no	no	B-II	yes	no	no	yes	1.47	no	yes	1.9	no	no	no	no	no	no	no	no	yes	no	yes	no	no	yes	yes	yes	yes	no	no	no	no	0	2	-2	2	0	2	moderate
77	no	M	no	no	no	no	no	no	no	no	no	no	no	66.77	no	no	1.2	no	no	no	no	no	no	no	no	yes	no	yes	no	no	yes	yes	yes	yes	no	no	no	no	0	0	0	2	0	2	moderate
88	no	M	no	no	no	no	no	no	no	no	no	no	no	1.35	no	no			no	no	no	no	no	no	no	yes	no	yes	no	no	yes	yes	yes	yes	no	no	no	no	0	0	0	2	0	2	moderate
66	no	M	no	no	no	yes	no	no	no	no	no	no	no	0.4	yes	no	2.4	no	yes	no	no	no	no	yes	no	no	no	no	no	no	yes	yes	yes	yes	no	no	no	no	0	0	0	2	0	2	moderate
60	no	M	no	no	no	yes	no	no	no	no	no	no	no	0.9	yes	no	3.4	yes	no	no	no	no	no	yes	no	no	no	no	no	no	yes	yes	yes	yes	no	no	no	no	0	0	0	2	0	2	moderate
58	no	M	no	no	no	yes	no	no	no	no	no	no	no	1.1	yes	no	1.4	no	no	no	no	no	no	no	no	no	no	no	no	no	yes	yes	yes	yes	no	no	no	no	0	0	0	2	0	2	moderate
60	no	M	no	no	yes	yes	no	no	no	no	no	no	yes	13.3	no	yes	2.7	no	no	yes	yes	no	no	no	no	yes	no	yes	no	no	yes	yes	yes	yes	no	no	no	no	0	2	-2	2	0	2	moderate
74	no	M	no	no	no	yes	no	no	no	no	no	no	yes	8.9	no	yes	3	no	no	yes	no	no	no	no	no	yes	no	yes	no	no	yes	yes	yes	yes	yes	yes	no	no	0	2	-2	2	0	2	moderate
74	no	M	no	no	no	yes	no	no	no	no	no	no	yes	1.4	no	yes	0.9	no	yes	yes	yes	no	no	no	no	yes	no	yes	no	no	yes	yes	yes	yes	no	no	no	no	0	2	-2	2	0	2	moderate
89	no	F	yes	no	no	no	no	no	B-I	yes	no	no	yes	8.8	no	no	1.36	no	no	yes	no	no	no	no	no	yes	no	yes	no	no	no	no	no	no	no	no	no	no	1	2	0	0	0	3	moderate
88	no	F	yes	no	no	no	no	no	B-I	yes	no	no	yes	1.9	no	no	1.2	no	no	yes	no	no	no	no	no	yes	no	yes	no	no	no	no	no	no	no	no	no	no	1	2	0	0	0	3	moderate
81	no	F	yes	no	no	yes	no	no	B-I	yes	no	no	yes	1.2	yes	no	2.4	no	no	yes	no	no	no	no	no	yes	no	yes	no	no	no	no	no	no	no	no	no	no	1	2	0	0	0	3	moderate
89	no	F	yes	no	no	yes	no	no	B-I	yes	no	no	yes	0.6	yes	no	2.2	no	no	yes	yes	no	no	no	no	no	no	no	no	no	no	no	no	no	no	no	no	no	1	2	0	0	0	3	moderate
80	no	F	yes	no	no	yes	no	no	B-II	yes	no	no	yes	1	yes	no	3	no	no	no	no	no	no	no	no	yes	no	yes	no	no	no	no	no	no	no	no	no	no	1	2	0	0	0	3	moderate
89	no	F	yes	no	no	yes	yes	no	no	no	no	no	yes	3.37	no	no	9	yes	yes	yes	no	no	no	no	no	yes	no	yes	no	no	no	no	no	no	no	no	no	no	1	2	0	0	0	3	moderate
81	no	F	yes	yes	no	no	no	no	no	no	no	no	yes	1.1	yes	no	1.84	no	no	yes	no	no	no	yes	no	no	no	no	no	no	no	no	no	no	no	no	no	no	1	2	0	0	0	3	moderate
85	no	F	yes	no	no	yes	yes	no	no	no	no	no	yes	15.3	no	no	1.3	no	no	yes	no	no	no	no	no	yes	no	yes	no	no	no	no	no	no	no	no	no	no	1	2	0	0	0	3	moderate
81	no	F	yes	no	no	no	yes	no	no	no	no	no	yes	9.5	no	no	10.7	yes	no	yes	yes	no	no	no	no	yes	no	yes	no	no	no	no	no	no	no	no	no	no	1	2	0	0	0	3	moderate
71	no	F	yes	no	no	yes	no	no	no	no	no	no	yes	0.78	yes	no	3	no	no	yes	no	no	no	no	no	no	no	no	no	no	no	no	no	no	no	no	no	no	1	2	0	0	0	3	moderate
59	no	F	yes	no	no	yes	yes	no	no	no	no	no	yes	7.3	no	no	2	no	no	yes	no	no	no	no	no	yes	no	no	no	no	no	no	no	no	yes	yes	no	no	1	2	0	0	0	3	moderate
83	no	F	yes	no	no	yes	no	no	no	no	no	no	yes	1.74	no	no	2	no	no	no	no	no	no	no	no	no	no	no	no	no	no	no	no	no	yes	yes	no	no	1	2	0	0	0	3	moderate
60	no	F	yes	no	no	no	no	no	no	no	no	no	yes	0.7	yes	no	2.1	no	no	no	no	no	no	no	no	yes	yes	yes	no	no	no	no	no	no	no	no	no	no	1	2	0	0	0	3	moderate
60	no	F	yes	no	no	no	no	no	no	no	no	no	yes	2.4	no	no			no	yes	no	no	no	no	no	yes	no	yes	no	no	no	no	no	no	no	no	no	no	1	2	0	0	0	3	moderate
79	no	F	yes	no	no	no	no	no	no	no	no	no	yes	9.9	no	no	3.05	yes	no	yes	no	no	no	no	no	yes	no	yes	no	no	no	no	no	no	no	no	no	no	1	2	0	0	0	3	moderate
83	no	F	yes	no	no	yes	no	no	no	no	no	yes	yes	0.64	yes	no	2	no	no	yes	no	no	no	yes	no	no	no	no	no	no	no	no	no	no	no	no	no	no	1	2	0	0	0	3	moderate
68	no	F	yes	no	no	no	no	no	no	no	no	no	yes	7.2	no	no	1.6	no	yes	yes	no	no	no	yes	no	yes	no	yes	no	no	no	no	no	no	no	no	no	no	1	2	0	0	0	3	moderate
87	no	F	yes	no	no	no	no	no	no	no	no	no	yes	1	yes	no			no	yes	no	no	yes	yes	no	no	no	no	no	no	no	no	no	no	no	no	no	no	1	2	0	0	0	3	moderate
37	yes	F	yes	no	no	yes	no	no	no	no	no	no	yes	1.7	no	no	1.9	no	no	yes	no	no	no	yes	no	no	no	no	no	no	no	no	no	no	yes	yes	no	no	1	2	0	0	0	3	moderate
75	no	F	yes	no	no	yes	no	no	no	no	no	no	yes	0.76	yes	no	4	yes	no	yes	no	no	no	yes	no	no	no	no	no	no	no	no	no	no	no	no	no	no	1	2	0	0	0	3	moderate
84	no	F	yes	no	no	yes	no	no	no	no	no	no	yes	0.57	yes	no	1	no	yes	yes	no	no	yes	yes	no	no	no	no	no	no	no	no	no	no	no	no	no	no	1	2	0	0	0	3	moderate
73	no	F	yes	no	no	yes	no	no	no	no	no	no	yes	0.62	yes	no	3	no	yes	yes	no	no	no	no	no	no	no	no	no	no	no	no	no	no	no	no	no	no	1	2	0	0	0	3	moderate
57	no	F	yes	no	no	no	no	no	no	no	no	no	yes	15	no	no	2.3	no	no	no	no	no	no	no	no	yes	no	yes	no	no	no	no	no	no	no	no	no	no	1	2	0	0	0	3	moderate
94	no	F	yes	no	no	no	no	no	no	no	no	no	yes	8.6	no	no	1.5	no	no	yes	no	no	no	no	no	yes	no	yes	no	no	no	no	no	no	no	no	no	no	1	2	0	0	0	3	moderate
84	no	F	yes	yes	no	no	no	no	no	no	no	no	yes	1.6	no	no	1.5	no	no	yes	no	no	no	no	no	yes	no	yes	no	no	no	no	no	no	no	no	no	no	1	2	0	0	0	3	moderate
75	no	F	yes	no	no	yes	no	no	no	no	no	no	yes	1.01	yes	no	2.9	no	no	yes	no	no	no	no	no	yes	no	yes	no	no	no	no	no	no	no	no	no	no	1	2	0	0	0	3	moderate
69	no	F	yes	no	no	yes	no	no	no	no	no	no	yes	0.82	yes	no	0.8	no	yes	yes	no	no	no	no	no	no	no	no	no	no	no	no	no	no	no	no	no	no	1	2	0	0	0	3	moderate
86	no	F	yes	no	no	no	no	no	no	no	yes	no	yes	2.1	no	no	1.8	no	no	yes	no	no	no	no	no	no	no	no	no	no	no	no	no	no	no	no	no	no	1	2	0	0	0	3	moderate
69	no	F	yes	no	no	yes	no	no	no	no	no	no	yes	0.76	yes	no	2	no	no	yes	no	no	no	yes	no	no	no	no	no	no	no	no	no	no	no	no	no	no	1	2	0	0	0	3	moderate
84	no	F	yes	no	no	yes	no	no	no	no	no	no	yes	0.66	yes	no	1	no	yes	yes	no	no	no	yes	no	no	no	no	no	no	no	no	no	no	no	no	no	no	1	2	0	0	0	3	moderate
95	no	F	yes	no	no	no	no	no	no	no	no	no	yes	1.7	no	no	2.8	no	yes	no	no	no	no	no	no	yes	no	yes	no	no	no	no	no	no	no	no	no	no	1	2	0	0	0	3	moderate
84	no	F	yes	no	no	no	no	no	no	no	no	no	yes	2.38	no	no	2	no	no	no	no	no	no	no	no	yes	no	no	no	no	no	no	no	no	no	no	no	no	1	2	0	0	0	3	moderate
72	no	F	yes	no	no	no	no	no	no	no	no	no	yes	6	no	no	1	no	no	yes	no	no	no	yes	no	no	no	no	no	no	no	no	no	no	no	no	no	no	1	2	0	0	0	3	moderate
86	no	F	yes	no	no	no	no	no	no	no	no	no	yes	1.5	no	no	2.3	no	yes	yes	no	no	no	yes	no	no	no	no	no	no	no	no	no	no	no	no	no	no	1	2	0	0	0	3	moderate
89	no	F	yes	no	no	no	no	no	no	no	no	no	yes	0.4	yes	no	2.5	no	yes	no	no	no	no	no	no	yes	no	yes	no	no	no	no	no	no	no	no	no	no	1	2	0	0	0	3	moderate
84	no	F	yes	no	no	yes	no	no	no	no	no	no	yes	2.12	no	no	2	no	no	no	no	no	no	no	no	yes	no	yes	no	no	no	no	no	no	no	no	no	no	1	2	0	0	0	3	moderate
84	no	F	yes	no	no	yes	no	no	no	no	no	no	yes	0.86	yes	no	3.1	yes	yes	yes	no	no	no	yes	no	no	no	no	no	no	no	no	no	no	no	no	no	no	1	2	0	0	0	3	moderate
84	no	F	yes	no	no	no	yes	no	no	no	no	no	yes	8.2	no	no	4.66	yes	no	no	no	no	no	no	no	no	no	no	no	no	no	no	no	no	no	no	no	no	1	2	0	0	0	3	moderate
95	no	F	yes	no	no	no	no	no	no	no	no	no	yes	0.6	yes	no	3	no	no	no	no	no	no	no	no	yes	no	yes	no	no	no	no	no	no	no	no	no	no	1	2	0	0	0	3	moderate
95	no	F	yes	no	no	no	no	no	no	no	no	no	yes	1.8	no	no	1.3	no	yes	yes	no	no	yes	yes	no	no	no	no	no	no	no	no	no	no	no	no	no	no	1	2	0	0	0	3	moderate
61	no	F	yes	no	no	no	no	no	no	no	no	no	yes	1.3	no	no	1.96	no	no	yes	no	no	no	no	no	no	no	no	no	no	no	no	no	no	no	no	no	no	1	2	0	0	0	3	moderate
80	no	F	yes	no	no	no	no	no	no	no	no	no	yes	2.7	no	no	0	no	yes	yes	no	no	no	yes	no	no	no	no	no	no	no	no	no	no	no	no	no	no	1	2	0	0	0	3	moderate
68	no	F	yes	no	no	no	no	no	no	no	no	no	yes	3.1	no	no	1.9	no	yes	yes	no	no	no	no	no	yes	no	yes	no	no	no	no	no	no	yes	no	yes	no	1	2	0	0	0	3	moderate
86	no	F	yes	no	no	yes	yes	no	no	no	no	no	yes	2.66	no	no	4.8	yes	no	yes	no	no	no	no	no	yes	no	no	yes	yes	no	no	no	no	no	no	no	no	1	2	0	0	0	3	moderate
89	no	F	yes	no	yes	no	no	no	no	no	no	no	yes	2.1	no	no	0.5	no	no	yes	no	no	no	no	no	yes	yes	yes	no	no	no	no	no	no	no	no	no	no	1	2	0	0	0	3	moderate
76	no	F	yes	no	no	yes	no	no	no	no	no	no	yes	1.1	yes	no	4	yes	yes	yes	no	no	no	yes	no	no	no	no	no	no	no	no	no	no	no	no	no	no	1	2	0	0	0	3	moderate
49	yes	F	yes	no	yes	no	no	no	no	no	no	no	yes	5.2	no	no	1.6	no	yes	yes	no	no	no	yes	no	no	no	no	no	no	no	no	no	no	no	no	no	no	1	2	0	0	0	3	moderate
69	no	F	yes	no	no	no	no	no	no	no	no	no	yes	3.5	no	no	0.5	no	yes	yes	no	no	no	yes	no	no	no	no	no	no	no	no	no	no	no	no	no	no	1	2	0	0	0	3	moderate
74	no	F	yes	no	no	no	no	no	no	no	no	no	yes	2.3	no	no	0.5	no	yes	yes	no	no	no	yes	no	no	no	no	no	no	no	no	no	no	no	no	no	no	1	2	0	0	0	3	moderate
59	no	F	yes	no	no	no	no	no	no	no	no	no	yes	0.8	yes	no	1	no	no	yes	no	no	no	yes	no	no	no	no	no	no	no	no	no	no	no	no	no	no	1	2	0	0	0	3	moderate
93	no	F	yes	no	no	yes	no	no	no	no	no	no	yes	2.38	no	no	4.2	yes	yes	yes	no	no	no	no	no	yes	no	yes	no	no	no	no	no	no	no	no	no	no	1	2	0	0	0	3	moderate
86	no	F	yes	no	no	no	no	no	no	no	no	no	yes	2.6	no	no	0.9	no	no	yes	no	no	no	no	no	yes	no	yes	no	no	no	no	no	no	yes	yes	no	no	1	2	0	0	0	3	moderate
80	no	F	yes	no	no	yes	no	no	no	no	no	no	yes	5.04	no	no	1.6	no	no	yes	no	no	no	no	no	yes	no	yes	no	no	no	no	no	no	no	no	no	no	1	2	0	0	0	3	moderate
84	no	F	yes	no	no	yes	no	no	no	no	no	no	yes	0.34	yes	no	2.8	no	no	no	no	no	no	no	no	no	no	no	no	no	no	no	no	no	no	no	no	no	1	2	0	0	0	3	moderate
80	no	F	yes	no	no	no	no	no	no	no	no	no	yes	4.1	no	no	2.1	no	yes	yes	no	no	no	yes	no	no	no	no	no	no	no	no	no	no	no	no	no	no	1	2	0	0	0	3	moderate
89	no	F	yes	no	yes	no	yes	no	no	no	no	no	yes	0.6	yes	no	3.4	yes	no	no	no	no	no	no	no	no	no	no	no	no	no	no	no	no	no	no	no	no	1	2	0	0	0	3	moderate
88	no	F	yes	no	no	no	yes	no	no	no	no	no	yes	15.84	no	no	11	yes	no	yes	no	no	no	no	no	yes	no	no	yes	no	no	no	no	no	no	no	no	no	1	2	0	0	0	3	moderate
70	no	F	yes	no	yes	yes	no	no	no	no	no	no	yes	4.8	no	no	0	no	no	yes	no	no	yes	yes	no	no	no	no	no	no	no	no	no	no	no	no	no	no	1	2	0	0	0	3	moderate
69	no	F	yes	no	no	no	no	no	no	no	no	no	yes	1.63	no	no	1.7	no	no	yes	no	no	no	no	no	no	no	no	no	no	no	no	no	no	no	no	no	no	1	2	0	0	0	3	moderate
73	no	F	yes	no	no	no	no	no	no	no	no	no	yes	1.3	no	no	0.5	no	no	no	no	no	no	no	no	yes	no	yes	no	no	no	no	no	no	yes	yes	no	no	1	2	0	0	0	3	moderate
92	no	F	yes	no	no	no	no	no	no	no	no	no	yes	0.64	yes	no	2	no	yes	no	no	no	no	no	no	yes	no	yes	no	no	no	no	no	no	no	no	no	no	1	2	0	0	0	3	moderate
86	no	F	yes	no	no	yes	no	no	no	no	no	no	yes	0.56	yes	no	0	no	no	yes	no	no	no	no	no	no	no	yes	no	no	no	no	no	no	no	no	no	no	1	2	0	0	0	3	moderate
73	no	F	yes	no	no	yes	no	no	no	no	no	no	yes	2.27	no	no	1.5	no	no	yes	no	no	no	yes	no	no	no	no	no	no	no	no	no	no	no	no	no	no	1	2	0	0	0	3	moderate
59	no	F	yes	no	no	no	no	no	no	no	no	no	yes	1.2	yes	no	1.9	no	no	yes	no	no	no	yes	no	no	no	no	no	no	no	no	no	no	no	no	no	no	1	2	0	0	0	3	moderate
81	no	F	yes	no	no	yes	no	no	no	no	no	no	yes	7.34	no	no	0.7	no	no	no	no	no	no	no	no	yes	no	yes	no	no	no	no	no	no	no	no	no	no	1	2	0	0	0	3	moderate
59	no	F	yes	no	no	no	yes	no	no	no	no	no	yes	8.44	no	no	2.6	no	no	yes	no	no	no	yes	no	yes	no	yes	no	no	no	no	no	no	no	no	no	no	1	2	0	0	0	3	moderate
93	no	F	yes	no	yes	no	no	no	no	no	no	no	yes	0.6	yes	no			yes	yes	no	no	no	yes	no	no	no	no	no	no	no	no	no	no	no	no	no	no	1	2	0	0	0	3	moderate
93	no	F	yes	no	no	no	no	no	no	no	no	no	yes	0.6	yes	no	4.8	yes	no	no	no	no	no	no	no	yes	no	no	yes	no	no	no	no	no	no	no	no	no	1	2	0	0	0	3	moderate
68	no	F	yes	no	no	no	no	no	no	no	no	no	yes	13.73	no	no	2	no	yes	yes	no	no	no	yes	no	yes	no	yes	no	no	no	no	no	no	no	no	no	no	1	2	0	0	0	3	moderate
85	no	F	yes	no	no	no	no	no	no	no	no	no	yes	1.7	no	no	0.6	no	no	yes	no	no	no	yes	no	no	no	no	no	no	no	no	no	no	no	no	no	no	1	2	0	0	0	3	moderate
92	no	F	yes	no	yes	no	no	no	no	no	yes	no	yes	3.8	no	no	0.5	no	yes	yes	no	no	no	yes	no	no	no	no	no	no	no	no	no	no	no	no	no	no	1	2	0	0	0	3	moderate
58	no	F	yes	no	yes	yes	no	no	no	no	yes	no	yes	5.5	no	no	0.5	no	no	yes	no	no	no	no	no	yes	no	yes	no	no	no	no	no	no	no	no	no	no	1	2	0	0	0	3	moderate
84	no	F	yes	no	no	no	no	no	no	no	no	no	yes	1.1	yes	no	1.2	no	no	yes	no	no	yes	yes	no	yes	no	no	no	no	no	no	no	no	yes	yes	no	no	1	2	0	0	0	3	moderate
88	no	F	yes	no	no	no	no	no	no	no	no	yes	yes	1.3	no	no			no	yes	no	no	no	yes	no	no	no	no	no	no	no	no	no	no	yes	yes	no	no	1	2	0	0	0	3	moderate
92	no	F	yes	no	no	no	no	no	no	no	no	no	yes	0.73	yes	no	2.9	no	no	yes	no	no	no	no	no	yes	no	yes	no	no	no	no	no	no	no	no	no	no	1	2	0	0	0	3	moderate
66	no	F	yes	no	no	yes	no	no	no	no	no	no	yes	0.64	yes	no	2.2	no	no	yes	no	no	no	yes	no	no	no	no	no	no	no	no	no	no	no	no	no	no	1	2	0	0	0	3	moderate
88	no	F	yes	no	no	no	no	no	no	no	no	no	yes	0.8	yes	no	6	yes	no	no	no	no	no	no	no	no	no	no	no	no	no	no	no	no	yes	yes	no	no	1	2	0	0	0	3	moderate
92	no	F	yes	no	no	no	no	no	no	no	no	no	yes	0.73	yes	no	1.8	no	no	yes	no	no	no	no	no	no	no	no	no	no	no	no	no	no	no	no	no	no	1	2	0	0	0	3	moderate
88	no	F	yes	no	no	no	no	no	no	no	no	no	yes	3.3	no	no	2.2	no	yes	yes	no	no	no	yes	no	no	no	no	no	no	no	no	no	no	no	no	no	no	1	2	0	0	0	3	moderate
74	no	F	yes	no	no	no	no	no	no	no	no	no	yes	0.94	yes	no	1.7	no	no	yes	no	no	yes	yes	no	no	no	no	no	no	no	no	no	no	no	no	no	no	1	2	0	0	0	3	moderate
87	no	F	yes	no	no	yes	no	no	no	no	no	no	yes	3.64	no	no	0	no	no	no	no	no	no	no	no	yes	no	no	no	no	no	no	no	no	no	no	no	no	1	2	0	0	0	3	moderate
81	no	F	yes	yes	no	yes	yes	no	no	no	yes	no	yes	15.81	no	no	5	yes	no	yes	no	no	no	no	no	yes	no	yes	no	no	no	no	no	no	no	no	no	no	1	2	0	0	0	3	moderate
76	no	F	yes	no	no	yes	no	no	no	no	no	no	yes	1.1	yes	no	1.6	no	no	yes	no	no	no	no	no	yes	no	yes	no	no	no	no	no	no	no	no	no	no	1	2	0	0	0	3	moderate
79	no	F	yes	no	no	no	no	no	no	no	no	no	yes	3.34	no	no	1.2	no	yes	yes	no	no	no	yes	no	no	no	no	no	no	no	no	no	no	no	no	no	no	1	2	0	0	0	3	moderate
89	no	F	yes	no	no	yes	no	no	no	no	no	no	yes	2.5	no	no	1.5	no	yes	yes	no	no	no	no	no	yes	no	no	yes	no	no	no	no	no	no	no	no	no	1	2	0	0	0	3	moderate
87	no	F	yes	no	no	no	no	no	no	no	no	no	yes	0.7	yes	no	2.6	no	yes	yes	no	no	no	yes	no	no	no	no	no	no	no	no	no	no	no	no	no	no	1	2	0	0	0	3	moderate
84	no	F	yes	no	no	no	no	no	no	no	no	no	yes	3.46	no	no	1.2	no	yes	yes	no	no	no	yes	no	no	no	no	no	no	no	no	no	no	no	no	no	no	1	2	0	0	0	3	moderate
82	no	F	yes	no	no	no	no	no	no	no	no	no	yes	6	no	no	0.8	no	no	yes	no	no	no	yes	no	yes	no	yes	no	no	no	no	no	no	no	no	no	no	1	2	0	0	0	3	moderate
65	no	F	yes	no	no	no	no	no	no	no	no	no	yes	2.13	no	no	1	no	no	yes	no	no	no	yes	no	no	no	no	no	no	no	no	no	no	no	no	no	no	1	2	0	0	0	3	moderate
85	no	F	yes	no	no	no	no	no	no	no	no	no	yes	1.39	no	no	1.7	no	no	yes	no	no	no	no	no	yes	no	yes	no	no	no	no	no	no	yes	no	yes	no	1	2	0	0	0	3	moderate
93	no	F	yes	no	no	yes	no	no	no	no	no	no	yes	2.85	no	no			yes	no	no	no	no	no	no	yes	no	yes	no	no	no	no	no	no	no	no	no	no	1	2	0	0	0	3	moderate
30	yes	F	yes	no	no	no	no	no	no	no	no	no	yes	0.9	yes	no	0	no	no	yes	no	no	no	yes	no	no	no	no	no	no	no	no	no	no	no	no	no	no	1	2	0	0	0	3	moderate
69	no	F	yes	no	no	yes	yes	no	no	no	no	no	yes	9.8	no	no	9.6	yes	no	yes	no	no	no	no	no	yes	no	yes	no	no	no	no	no	no	no	no	no	no	1	2	0	0	0	3	moderate
85	no	F	yes	no	no	yes	no	no	no	no	no	no	yes	3.2	no	no			no	yes	no	no	no	no	no	yes	no	yes	no	no	no	no	no	no	no	no	no	no	1	2	0	0	0	3	moderate
72	no	F	yes	no	no	no	no	no	no	no	no	no	yes	10.2	no	no	0	no	no	yes	no	no	no	no	no	yes	no	yes	no	no	no	no	no	no	no	no	no	no	1	2	0	0	0	3	moderate
94	no	F	yes	no	no	yes	no	no	no	no	no	no	yes	1.97	no	no			yes	no	no	no	no	no	no	yes	no	yes	no	no	no	no	no	no	no	no	no	no	1	2	0	0	0	3	moderate
91	no	F	yes	no	no	yes	no	no	no	no	no	no	yes	2.85	no	no	2.3	no	yes	yes	no	no	no	no	no	yes	no	yes	no	no	no	no	no	no	no	no	no	no	1	2	0	0	0	3	moderate
91	no	F	yes	no	no	yes	no	no	no	no	no	no	yes	1	yes	no	1.5	no	no	yes	no	no	no	yes	no	no	no	no	no	no	no	no	no	no	no	no	no	no	1	2	0	0	0	3	moderate
74	no	F	yes	no	no	no	no	no	no	no	no	no	yes	0.6	yes	no	1	no	no	yes	no	no	no	yes	no	no	no	no	no	no	no	no	no	no	no	no	no	no	1	2	0	0	0	3	moderate
42	yes	F	yes	no	no	no	no	no	no	no	no	no	yes	0.9	yes	no	1	no	no	yes	no	no	no	yes	no	no	no	no	no	no	no	no	no	no	no	no	no	no	1	2	0	0	0	3	moderate
94	no	F	yes	no	no	no	no	no	no	no	no	no	yes	0.7	yes	no	1.7	no	no	yes	no	no	no	yes	no	no	no	no	no	no	no	no	no	no	no	no	no	no	1	2	0	0	0	3	moderate
91	no	F	yes	no	no	yes	no	no	no	no	no	no	yes	1.29	no	no			no	yes	no	no	no	yes	no	no	no	no	no	no	no	no	no	no	no	no	no	no	1	2	0	0	0	3	moderate
83	no	F	yes	no	no	no	no	no	no	no	no	no	yes	0.4	yes	no	1	no	no	yes	no	no	no	no	no	yes	no	yes	no	no	no	no	no	no	no	no	no	no	1	2	0	0	0	3	moderate
63	no	F	yes	no	no	yes	no	no	no	no	no	no	yes	0.7	yes	no	1.4	no	no	yes	no	no	no	yes	no	no	no	no	no	no	no	no	no	no	no	no	no	no	1	2	0	0	0	3	moderate
77	no	F	yes	no	no	yes	no	no	no	no	no	no	yes	3.4	no	no	2.8	no	no	yes	no	no	no	yes	no	no	no	no	no	no	no	no	no	no	no	no	no	no	1	2	0	0	0	3	moderate
84	no	F	yes	no	no	yes	no	no	no	no	no	no	yes	3.8	no	no	1.9	no	no	yes	no	no	no	yes	no	no	no	no	no	no	no	no	no	no	no	no	no	no	1	2	0	0	0	3	moderate
91	no	F	yes	no	no	yes	no	no	no	no	no	no	yes	0.9	yes	no	2	no	yes	yes	no	no	yes	yes	no	no	no	no	no	no	no	no	no	no	no	no	no	no	1	2	0	0	0	3	moderate
66	no	F	yes	no	no	yes	yes	no	no	no	no	no	yes	8.7	no	no	7	yes	no	yes	no	no	no	no	no	yes	no	yes	no	no	no	no	no	no	no	no	no	no	1	2	0	0	0	3	moderate
82	no	F	yes	no	no	yes	no	no	no	no	no	no	yes	2.9	no	no	2.9	no	yes	yes	no	no	yes	yes	no	yes	no	yes	no	no	no	no	no	no	no	no	no	no	1	2	0	0	0	3	moderate
83	no	F	yes	no	no	yes	no	no	no	no	no	no	yes	1.9	no	no	0	no	yes	yes	no	no	no	no	no	no	no	no	no	no	no	no	no	no	no	no	no	no	1	2	0	0	0	3	moderate
76	no	F	yes	no	no	yes	no	no	no	no	no	no	yes	0.7	yes	no	1	no	no	no	no	no	no	no	no	yes	no	yes	no	no	no	no	no	no	no	no	no	no	1	2	0	0	0	3	moderate
73	no	F	yes	no	no	yes	yes	no	no	no	no	no	yes	17.6	no	no	4.7	yes	no	yes	no	no	no	no	no	yes	no	yes	no	no	no	no	no	no	no	no	no	no	1	2	0	0	0	3	moderate
86	no	F	yes	no	no	yes	no	no	no	no	no	no	yes	0.8	yes	no	2.2	no	no	yes	no	no	no	yes	no	no	no	no	no	no	no	no	no	no	no	no	no	no	1	2	0	0	0	3	moderate
74	no	F	yes	no	no	yes	yes	no	no	no	no	no	yes	15.2	no	no	7.7	yes	no	yes	no	no	no	no	no	yes	no	yes	no	no	no	no	no	no	no	no	no	no	1	2	0	0	0	3	moderate
66	no	F	yes	no	no	no	no	no	no	no	no	no	yes	9.6	no	no	1.3	no	yes	no	no	no	no	no	no	yes	no	yes	no	no	no	no	no	no	no	no	no	no	1	2	0	0	0	3	moderate
74	no	F	yes	no	no	yes	yes	no	no	no	no	no	yes	1.1	yes	no	8.7	yes	no	yes	no	no	no	no	no	yes	no	no	yes	no	no	no	no	no	no	no	no	no	1	2	0	0	0	3	moderate
82	no	F	yes	no	no	yes	no	no	no	no	no	no	yes	6.1	no	no	1.8	no	no	no	no	no	no	no	no	yes	no	yes	no	no	no	no	no	no	no	no	no	no	1	2	0	0	0	3	moderate
69	no	F	yes	no	no	yes	no	no	no	no	no	no	yes	1.2	yes	no	1.2	no	no	yes	no	no	no	yes	no	no	no	no	no	no	no	no	no	no	no	no	no	no	1	2	0	0	0	3	moderate
67	no	F	yes	no	no	yes	no	no	no	no	no	no	yes	1	yes	no	1	no	no	no	no	no	no	no	yes	no	no	no	no	no	no	no	no	no	no	no	no	no	1	2	0	0	0	3	moderate
20	yes	F	yes	no	no	yes	no	no	no	no	yes	no	yes	2.9	no	no	2.3	no	no	yes	no	no	no	yes	no	no	no	no	no	no	no	no	no	no	no	no	no	no	1	2	0	0	0	3	moderate
79	no	F	yes	no	no	yes	no	no	no	no	no	no	yes	0.4	yes	no	1.7	no	no	yes	no	no	no	yes	no	no	no	no	no	no	no	no	no	no	no	no	no	no	1	2	0	0	0	3	moderate
58	no	F	yes	no	no	yes	no	no	no	no	no	no	yes	1.1	yes	no	1.3	no	yes	no	no	no	no	no	no	no	no	no	no	no	no	no	no	no	no	no	no	no	1	2	0	0	0	3	moderate
71	no	F	yes	no	no	yes	no	no	no	no	no	no	yes	0.5	yes	no	1.8	no	no	yes	no	no	no	no	no	yes	no	yes	no	no	no	no	no	no	no	no	no	no	1	2	0	0	0	3	moderate
64	no	F	yes	no	no	yes	yes	no	no	no	no	no	yes	6.9	no	no	10.3	yes	no	yes	no	no	no	no	no	yes	no	yes	no	no	no	no	no	no	no	no	no	no	1	2	0	0	0	3	moderate
69	no	F	yes	no	no	yes	no	no	no	no	no	no	yes	7.3	no	no	1.8	no	no	yes	no	no	no	no	no	yes	no	yes	no	no	no	no	no	no	no	no	no	no	1	2	0	0	0	3	moderate
76	no	F	yes	no	no	yes	no	no	no	no	no	no	no	3.96	no	no	4.3	yes	no	yes	no	no	no	no	no	yes	no	no	no	no	no	yes	no	no	no	no	no	no	1	0	0	2	0	3	moderate
51	no	F	yes	no	no	yes	no	no	no	no	no	no	no	0.2	yes	no			no	no	no	no	no	no	no	no	no	no	no	no	no	yes	no	no	no	no	no	no	1	0	0	2	0	3	moderate
71	no	F	yes	no	yes	no	no	no	no	no	yes	yes	no	0.7	yes	no	7	yes	no	no	no	no	no	no	no	no	no	no	no	no	no	yes	yes	no	no	no	no	no	1	0	0	2	0	3	moderate
65	no	F	yes	no	yes	no	yes	no	no	no	no	no	no	0.9	yes	no	3	no	no	no	no	no	no	no	no	no	no	no	no	no	no	yes	yes	no	yes	yes	no	no	1	0	0	2	0	3	moderate
56	no	F	yes	no	no	yes	no	no	no	no	no	no	no	0.7	yes	no	1.9	no	no	no	no	no	no	no	no	no	no	no	no	no	no	yes	yes	no	no	no	no	no	1	0	0	2	0	3	moderate
46	yes	F	yes	no	no	no	no	no	no	no	no	no	yes	0.4	yes	yes	7	yes	no	yes	no	no	no	no	no	no	no	no	no	no	no	yes	yes	no	no	no	no	no	1	2	-2	2	0	3	moderate
78	no	F	yes	no	no	yes	no	no	no	no	no	no	yes	0.3	yes	yes			no	no	no	no	no	no	no	no	no	no	no	no	no	yes	yes	no	no	no	no	no	1	2	-2	2	0	3	moderate
80	no	F	yes	no	no	yes	no	yes	no	no	no	no	no	0.58	yes	yes	5	yes	yes	no	no	no	no	no	no	no	no	no	no	no	no	yes	yes	no	yes	yes	no	no	1	0	-2	2	2	3	moderate
88	no	F	yes	no	no	yes	no	no	R-Y	yes	no	no	yes	1.07	yes	no	2.6	no	no	no	no	no	no	no	no	no	no	no	no	no	no	no	no	no	no	no	no	no	1	2	0	0	0	3	moderate
88	no	F	yes	no	no	no	no	no	R-Y	yes	no	no	yes	6.4	no	no			no	no	no	no	no	no	no	yes	yes	no	yes	no	no	no	no	no	no	no	no	no	1	2	0	0	0	3	moderate
75	no	F	yes	yes	no	no	yes	no	no	no	no	no	no	9.5	no	no			no	yes	yes	no	no	no	no	yes	no	no	yes	yes	yes	yes	no	no	no	no	no	no	1	0	0	2	0	3	moderate
92	no	F	yes	no	no	no	no	no	no	no	no	no	no	0.51	yes	no			no	no	no	no	no	yes	no	no	no	no	no	no	yes	yes	no	no	no	no	no	no	1	0	0	2	0	3	moderate
94	no	F	yes	no	no	yes	no	no	no	no	no	no	no	1.9	no	no			yes	no	no	no	no	no	no	yes	no	yes	no	no	yes	yes	no	no	no	no	no	no	1	0	0	2	0	3	moderate
87	no	F	yes	no	no	no	no	no	no	no	no	no	yes	2.1	no	no	2.1	no	yes	yes	no	yes	no	yes	no	no	no	no	no	no	no	no	no	no	no	no	no	no	1	2	0	0	0	3	moderate
89	no	F	yes	no	no	yes	no	no	no	no	no	no	yes	0.7	yes	no	2	no	no	yes	no	yes	no	no	no	no	no	no	no	no	no	no	no	no	no	no	no	no	1	2	0	0	0	3	moderate
95	no	F	yes	no	no	no	no	no	no	no	no	no	yes	1.39	no	no	0.8	no	yes	yes	no	yes	no	yes	no	no	no	no	no	no	no	no	no	no	no	no	no	no	1	2	0	0	0	3	moderate
75	no	F	yes	no	no	yes	no	no	no	no	no	no	yes	1	yes	no	1.9	no	yes	yes	no	yes	no	yes	no	no	no	no	no	no	no	no	no	no	no	no	no	no	1	2	0	0	0	3	moderate
85	no	F	yes	no	no	no	no	no	no	no	no	no	yes	0.4	yes	no	1.3	no	yes	yes	no	no	no	yes	no	no	no	no	no	no	no	no	yes	yes	yes	yes	no	no	1	2	0	0	0	3	moderate
63	no	F	yes	no	no	yes	no	no	no	no	no	no	no	1.16	yes	no			yes	yes	no	no	no	yes	no	no	no	no	no	no	yes	yes	yes	yes	no	no	no	no	1	0	0	2	0	3	moderate
87	no	F	yes	no	no	no	no	no	no	no	no	no	no	4.4	no	no			yes	yes	no	no	no	yes	no	no	no	no	no	no	yes	yes	yes	yes	no	no	no	no	1	0	0	2	0	3	moderate
28	yes	F	yes	no	no	no	no	no	no	no	no	no	no	0.71	yes	no	1.8	no	no	no	no	no	no	no	no	yes	no	no	no	no	yes	yes	yes	yes	no	no	no	no	1	0	0	2	0	3	moderate
81	no	F	yes	no	no	yes	yes	no	no	no	yes	no	no	1.92	no	no	8.6	yes	no	no	no	no	no	no	no	yes	no	yes	no	no	yes	yes	yes	yes	no	no	no	no	1	0	0	2	0	3	moderate
25	yes	F	yes	no	no	yes	no	no	no	no	no	no	no	7.5	no	no	1.8	no	no	yes	no	no	no	no	no	yes	no	no	no	no	yes	yes	yes	yes	no	no	no	no	1	0	0	2	0	3	moderate
81	no	F	yes	no	no	no	yes	no	no	no	no	no	yes	3.89	no	yes	3.2	yes	no	yes	yes	no	no	no	no	yes	no	yes	no	no	yes	yes	yes	yes	no	no	no	no	1	2	-2	2	0	3	moderate
70	no	F	yes	no	no	yes	no	no	no	no	no	no	no	1.93	no	no	1	no	no	yes	no	yes	no	no	no	no	no	no	no	no	yes	yes	yes	yes	no	no	no	no	1	0	0	2	0	3	moderate
57	no	M	no	no	no	yes	yes	no	B-I	yes	no	no	yes	0.3	yes	no	2.3	no	no	no	no	no	no	no	no	no	no	no	no	no	no	yes	no	no	no	no	no	no	0	2	0	2	0	4	high
78	no	M	no	no	no	no	no	no	no	no	no	no	yes	0.7	yes	no	3.25	yes	no	yes	no	no	no	yes	no	no	no	no	no	no	no	yes	no	no	no	no	no	no	0	2	0	2	0	4	high
77	no	M	no	no	no	no	yes	no	no	no	no	no	yes	1.3	no	no	2.8	no	no	no	no	no	no	no	no	no	no	no	no	no	no	yes	no	no	yes	yes	no	no	0	2	0	2	0	4	high
74	no	M	no	no	no	yes	no	no	no	no	yes	no	yes	0.8	yes	no	2.5	no	no	no	no	no	no	no	no	no	no	no	no	no	no	yes	no	no	yes	yes	no	no	0	2	0	2	0	4	high
75	no	M	no	no	no	yes	no	no	no	no	yes	no	yes	0.88	yes	no	3	no	no	no	no	no	no	no	no	no	no	no	no	no	no	yes	yes	no	no	no	no	no	0	2	0	2	0	4	high
77	no	M	no	no	no	no	yes	no	no	no	no	no	yes	1.1	yes	no			no	no	no	no	no	no	no	no	no	no	no	no	no	yes	yes	no	no	no	no	no	0	2	0	2	0	4	high
77	no	M	no	no	no	no	yes	no	no	no	no	no	yes	1.2	yes	no	6.8	yes	no	no	no	no	no	no	no	no	no	no	no	no	no	yes	yes	no	yes	yes	no	no	0	2	0	2	0	4	high
50	no	M	no	no	no	yes	no	no	no	no	no	no	yes	13.3	no	no	1.5	no	no	yes	no	no	no	no	no	yes	no	yes	no	no	no	yes	yes	no	no	no	no	no	0	2	0	2	0	4	high
52	no	M	no	no	no	yes	no	no	no	no	no	no	yes	0.6	yes	no	5	yes	no	no	no	no	no	no	no	no	no	no	no	no	no	yes	yes	no	no	no	no	no	0	2	0	2	0	4	high
19	yes	M	no	no	no	yes	no	no	no	no	yes	no	yes	0.9	yes	no	2.5	no	no	no	no	no	no	no	no	no	no	no	no	no	no	yes	yes	no	no	no	no	no	0	2	0	2	0	4	high
57	no	M	no	no	no	yes	no	no	no	no	no	no	yes	0.3	yes	no	1.2	no	no	no	no	no	no	no	no	no	no	no	no	no	no	yes	yes	no	no	no	no	no	0	2	0	2	0	4	high
73	no	M	no	no	no	yes	no	yes	no	no	no	no	no	0.66	yes	no	9.1	yes	no	no	no	no	no	no	no	no	no	no	no	no	no	yes	no	no	no	no	no	no	0	0	0	2	2	4	high
76	no	M	no	no	no	yes	no	yes	no	no	no	no	no	1.88	no	no			no	no	no	no	no	no	no	no	no	no	no	no	no	yes	yes	no	no	no	no	no	0	0	0	2	2	4	high
44	yes	M	no	yes	no	no	no	no	no	no	no	no	yes	1.7	no	no	1.73	no	yes	yes	no	no	no	yes	no	no	no	no	no	no	yes	yes	no	no	no	no	no	no	0	2	0	2	0	4	high
80	no	M	no	no	no	yes	no	no	no	no	no	no	yes	0.85	yes	no	1.8	no	no	yes	no	no	no	yes	no	yes	no	yes	no	no	yes	yes	no	no	no	no	no	no	0	2	0	2	0	4	high
88	no	M	no	no	yes	no	no	no	no	no	no	no	yes	11	no	no	2.07	no	no	no	no	no	no	no	no	yes	no	yes	no	no	yes	yes	no	no	yes	no	no	yes	0	2	0	2	0	4	high
91	no	M	no	yes	no	no	yes	no	no	no	no	no	yes	19.6	no	no	2.59	no	no	no	no	no	no	no	no	yes	no	yes	no	no	yes	yes	no	no	no	no	no	no	0	2	0	2	0	4	high
31	yes	M	no	no	no	no	no	no	no	no	no	no	yes	1	yes	no			no	yes	no	no	no	no	no	no	no	no	no	no	yes	yes	no	no	no	no	no	no	0	2	0	2	0	4	high
41	yes	M	no	no	no	yes	no	no	no	no	no	no	yes	3.56	no	no	3	no	no	no	no	no	no	no	no	yes	no	no	no	no	yes	yes	no	no	no	no	no	no	0	2	0	2	0	4	high
53	no	M	no	no	no	no	no	no	no	no	no	no	yes	4.9	no	no	2.2	no	no	no	no	no	no	no	no	yes	no	yes	no	no	yes	yes	no	no	yes	yes	no	no	0	2	0	2	0	4	high
74	no	M	no	no	no	yes	no	no	no	no	no	no	yes	4.95	no	no	1	no	no	yes	no	no	no	yes	no	no	no	no	no	no	yes	yes	no	no	no	no	no	no	0	2	0	2	0	4	high
82	no	M	no	no	no	yes	no	no	no	no	no	no	yes	4.12	no	no	3	no	no	yes	no	no	no	no	no	yes	no	yes	no	no	yes	yes	no	no	no	no	no	no	0	2	0	2	0	4	high
70	no	M	no	no	no	yes	yes	no	no	no	no	no	yes	0.46	yes	no	4	yes	no	no	no	no	no	no	no	no	no	no	no	no	yes	yes	no	no	no	no	no	no	0	2	0	2	0	4	high
85	no	M	no	no	no	yes	no	no	no	no	no	no	yes	1.73	no	no	2.6	no	no	no	no	no	no	no	no	yes	no	yes	no	no	yes	yes	no	no	no	no	no	no	0	2	0	2	0	4	high
76	no	M	no	no	no	no	no	no	no	no	no	no	yes	0.5	yes	no	2	no	no	yes	no	no	no	no	no	yes	no	yes	no	no	yes	yes	no	no	yes	yes	no	no	0	2	0	2	0	4	high
70	no	M	no	no	no	yes	yes	no	no	no	no	no	yes	0.61	yes	no	2	no	no	no	yes	no	no	no	no	no	no	no	no	no	yes	yes	no	no	no	no	no	no	0	2	0	2	0	4	high
88	no	M	no	no	no	yes	no	no	no	no	no	no	yes	10.35	no	no	2.8	no	no	no	no	no	no	no	no	yes	no	yes	no	no	yes	yes	no	no	no	no	no	no	0	2	0	2	0	4	high
89	no	M	no	no	no	no	yes	no	no	no	no	no	yes	11.1	no	no	3	no	no	no	no	no	no	no	no	yes	no	yes	no	no	yes	yes	no	no	no	no	no	no	0	2	0	2	0	4	high
84	no	M	no	no	no	yes	no	no	no	no	yes	no	yes	2.42	no	no	1.6	no	yes	no	no	no	no	no	no	yes	no	no	no	no	yes	yes	no	no	no	no	no	no	0	2	0	2	0	4	high
82	no	M	no	no	no	no	yes	no	no	no	no	no	yes	18.1	no	no	5.31	yes	no	yes	no	no	no	no	no	yes	no	no	yes	no	yes	yes	no	no	no	no	no	no	0	2	0	2	0	4	high
72	no	M	no	no	no	yes	no	no	no	no	no	no	yes	3.56	no	no	1.2	no	no	no	no	no	no	no	no	no	no	no	no	no	yes	yes	no	no	no	no	no	no	0	2	0	2	0	4	high
87	no	M	no	no	no	no	no	no	no	no	no	no	yes	0.86	yes	no	1.9	no	no	no	no	no	no	no	no	yes	no	yes	no	no	yes	yes	no	no	no	no	no	no	0	2	0	2	0	4	high
74	no	M	no	no	yes	no	no	no	no	no	no	no	yes	0.8	yes	no	2.4	no	no	yes	no	no	no	yes	no	no	no	no	no	no	yes	yes	no	no	no	no	no	no	0	2	0	2	0	4	high
67	no	M	no	no	no	yes	no	no	no	no	no	no	yes	23.44	no	no	0	no	no	no	no	no	no	no	no	no	no	no	no	no	yes	yes	no	no	no	no	no	no	0	2	0	2	0	4	high
74	no	M	no	no	no	yes	no	no	no	no	no	no	yes	1.33	no	no	1.5	no	yes	yes	no	no	no	no	no	no	no	no	no	no	yes	yes	no	no	no	no	no	no	0	2	0	2	0	4	high
77	no	M	no	no	no	no	no	no	no	no	no	no	yes	1.79	no	no	1.1	no	no	yes	no	no	no	yes	no	no	no	no	no	no	yes	yes	no	no	no	no	no	no	0	2	0	2	0	4	high
69	no	M	no	no	no	yes	no	no	no	no	no	no	yes	6.8	no	no	3.6	yes	no	yes	no	no	no	no	no	yes	yes	no	yes	no	yes	yes	no	no	no	no	no	no	0	2	0	2	0	4	high
86	no	M	no	no	no	yes	no	no	no	no	no	no	yes	1.22	no	no	2	no	no	yes	no	no	no	no	no	yes	no	yes	no	no	yes	yes	no	no	yes	yes	no	no	0	2	0	2	0	4	high
79	no	M	no	no	no	yes	no	no	no	no	no	no	yes	0.4	yes	no	2.5	no	no	yes	no	no	no	yes	no	no	no	no	no	no	yes	yes	no	no	no	no	no	no	0	2	0	2	0	4	high
88	no	M	no	no	no	yes	no	no	no	no	no	no	yes	1.4	no	no	3.6	yes	no	yes	no	no	no	yes	no	yes	no	yes	no	no	yes	yes	no	no	yes	no	yes	no	0	2	0	2	0	4	high
68	no	M	no	no	yes	yes	no	no	no	no	no	no	yes	6.44	no	no			no	yes	no	no	no	no	no	yes	no	yes	no	no	yes	yes	no	no	yes	yes	no	no	0	2	0	2	0	4	high
77	no	M	no	no	no	yes	no	no	no	no	no	no	yes	0.4	yes	no	1.3	no	yes	yes	no	no	no	yes	no	no	no	no	no	no	yes	yes	no	no	no	no	no	no	0	2	0	2	0	4	high
87	no	M	no	no	no	yes	no	no	no	no	no	no	yes	1	yes	no	2.7	no	no	yes	yes	no	no	no	no	yes	no	yes	no	no	yes	yes	no	no	no	no	no	no	0	2	0	2	0	4	high
78	no	M	no	no	no	yes	yes	no	no	no	no	no	yes	0.6	yes	no	7	yes	no	yes	no	no	no	no	no	yes	no	yes	no	no	yes	yes	no	no	no	no	no	no	0	2	0	2	0	4	high
81	no	M	no	no	no	yes	no	no	no	no	no	no	yes	3.3	no	no	1	no	yes	yes	no	no	no	no	no	yes	no	yes	no	no	yes	yes	no	no	no	no	no	no	0	2	0	2	0	4	high
65	no	M	no	no	no	yes	no	no	no	no	no	no	yes	1.4	no	no	1.4	no	yes	yes	no	no	no	yes	no	no	no	no	no	no	yes	yes	no	no	no	no	no	no	0	2	0	2	0	4	high
57	no	M	no	no	no	yes	no	no	no	no	no	no	yes	0.9	yes	no	0.6	no	no	yes	no	no	no	no	no	yes	no	yes	no	no	yes	yes	no	no	no	no	no	no	0	2	0	2	0	4	high
67	no	M	no	no	no	yes	no	no	no	no	no	no	yes	0.6	yes	no	3.6	yes	no	no	no	no	no	no	no	yes	no	yes	no	no	yes	yes	no	no	no	no	no	no	0	2	0	2	0	4	high
86	no	M	no	no	no	yes	no	no	no	no	no	no	yes	2.4	no	no	1.8	no	yes	yes	no	no	no	yes	no	no	no	no	no	no	yes	yes	no	no	no	no	no	no	0	2	0	2	0	4	high
68	no	M	no	no	no	yes	yes	no	no	no	no	no	yes	7.3	no	no	1.7	no	no	yes	no	no	no	no	no	yes	no	yes	no	no	yes	yes	no	no	no	no	no	no	0	2	0	2	0	4	high
82	no	M	no	no	no	no	no	no	R-Y	yes	no	no	yes	1	yes	no	2.2	no	no	yes	no	no	yes	yes	no	no	no	no	no	no	yes	yes	no	no	no	no	no	no	0	2	0	2	0	4	high
76	no	M	no	no	no	yes	no	no	R-Y	yes	no	no	yes	0.6	yes	no	3.1	yes	no	no	no	no	no	no	no	no	no	no	no	no	yes	yes	no	no	no	no	no	no	0	2	0	2	0	4	high
39	yes	M	no	no	yes	no	no	no	no	no	no	no	yes	1.4	no	no	2	no	no	yes	no	yes	no	yes	no	no	no	no	no	no	yes	yes	no	no	no	no	no	no	0	2	0	2	0	4	high
86	no	M	no	no	no	yes	no	no	no	no	no	no	yes	0.56	yes	no			no	no	no	yes	no	yes	no	no	no	no	no	no	yes	yes	no	no	no	no	no	no	0	2	0	2	0	4	high
80	no	M	no	no	no	yes	no	no	no	no	no	no	yes	1.1	yes	no	1.5	no	yes	yes	no	yes	no	yes	no	no	no	no	no	no	yes	yes	no	no	no	no	no	no	0	2	0	2	0	4	high
64	no	M	no	no	no	no	no	no	no	no	no	no	yes	33.2	no	no	0.9	no	no	yes	no	yes	no	yes	no	yes	no	yes	no	no	yes	yes	no	no	no	no	no	no	0	2	0	2	0	4	high
79	no	M	no	no	no	no	no	no	B-I	yes	no	no	yes	14	no	no	1.9	no	no	yes	no	no	no	no	no	no	no	no	no	no	yes	yes	yes	yes	yes	yes	no	no	0	2	0	2	0	4	high
84	no	M	no	no	no	yes	no	no	B-I	yes	yes	no	yes	10.5	no	no	1.8	no	no	yes	no	no	no	no	no	yes	no	yes	no	no	yes	yes	yes	yes	no	no	no	no	0	2	0	2	0	4	high
86	no	M	no	no	no	yes	no	no	B-II	yes	no	no	yes	15.9	no	no	3.3	yes	no	yes	no	no	no	no	no	yes	no	yes	no	no	yes	yes	yes	yes	no	no	no	no	0	2	0	2	0	4	high
71	no	M	no	no	no	yes	yes	no	no	no	no	no	yes	16.16	no	no	4.4	yes	no	no	no	no	no	no	no	yes	no	yes	no	no	yes	yes	yes	yes	no	no	no	no	0	2	0	2	0	4	high
84	no	M	no	no	no	yes	no	no	no	no	yes	no	yes	1.1	yes	no			no	yes	no	no	no	yes	no	no	no	no	no	no	yes	yes	yes	yes	no	no	no	no	0	2	0	2	0	4	high
71	no	M	no	no	no	yes	yes	no	no	no	no	no	yes	3.04	no	no			no	no	no	no	no	no	no	yes	no	yes	no	no	yes	yes	yes	yes	no	no	no	no	0	2	0	2	0	4	high
72	no	M	no	no	yes	no	no	no	no	no	no	no	yes	0.7	yes	no	1.8	no	yes	yes	no	no	no	no	no	yes	no	yes	no	no	yes	yes	yes	yes	no	no	no	no	0	2	0	2	0	4	high
86	no	M	no	no	no	yes	no	no	no	no	no	no	yes	0.86	yes	no			no	no	no	no	no	no	no	yes	no	yes	no	no	yes	yes	yes	yes	no	no	no	no	0	2	0	2	0	4	high
86	no	M	no	no	no	yes	yes	no	no	no	no	no	yes	8.91	no	no	5.8	yes	no	yes	no	no	no	no	no	yes	no	no	yes	no	yes	yes	yes	yes	no	no	no	no	0	2	0	2	0	4	high
83	no	M	no	no	yes	yes	no	no	no	no	no	no	yes	6.7	no	no	2.3	no	no	yes	no	no	no	no	no	yes	no	yes	no	no	yes	yes	yes	yes	yes	yes	no	no	0	2	0	2	0	4	high
72	no	M	no	no	no	no	no	no	no	no	no	no	yes	0.5	yes	no	1.6	no	no	yes	no	no	no	no	no	no	no	no	no	no	yes	yes	yes	yes	no	no	no	no	0	2	0	2	0	4	high
86	no	M	no	no	no	no	no	no	no	no	no	no	yes	2.4	no	no	2.4	no	yes	yes	no	no	no	yes	no	no	no	no	no	no	yes	yes	yes	yes	no	no	no	no	0	2	0	2	0	4	high
78	no	M	no	no	no	no	no	no	no	no	no	no	yes	1.29	no	no	2.1	no	no	yes	yes	no	no	no	no	yes	yes	yes	no	no	yes	yes	yes	yes	no	no	no	no	0	2	0	2	0	4	high
71	no	M	no	no	no	yes	no	no	no	no	no	no	yes	4.37	no	no	0.9	no	yes	yes	no	no	no	no	no	no	no	no	no	no	yes	yes	yes	yes	no	no	no	no	0	2	0	2	0	4	high
88	no	M	no	no	no	no	no	no	no	no	no	no	yes	0.7	yes	no	0	no	no	no	no	no	no	no	no	yes	no	yes	no	no	yes	yes	yes	yes	no	no	no	no	0	2	0	2	0	4	high
57	no	M	no	no	no	yes	no	no	no	no	no	no	yes	2.9	no	no	2.2	no	no	yes	no	no	no	yes	no	no	no	no	no	no	yes	yes	yes	yes	no	no	no	no	0	2	0	2	0	4	high
70	no	M	no	no	no	yes	no	no	no	no	no	no	yes	0.4	yes	no	1.6	no	no	yes	no	no	no	no	no	no	no	no	no	no	yes	yes	yes	yes	no	no	no	no	0	2	0	2	0	4	high
89	no	M	no	no	no	yes	no	no	no	no	no	no	yes	3.1	no	no	2.1	no	yes	yes	no	no	no	yes	no	no	no	no	no	no	yes	yes	yes	yes	no	no	no	no	0	2	0	2	0	4	high
74	no	M	no	no	no	yes	no	no	no	no	no	no	yes	1.9	no	no	2.6	no	no	no	no	no	no	no	yes	yes	no	yes	no	no	yes	yes	yes	yes	no	no	no	no	0	2	0	2	0	4	high
75	no	M	no	no	no	yes	yes	no	no	no	no	no	yes	2.2	no	no	2.6	no	no	yes	no	no	no	no	no	yes	no	yes	no	no	yes	yes	yes	yes	no	no	no	no	0	2	0	2	0	4	high
72	no	M	no	no	no	yes	no	no	no	no	no	no	yes	0.8	yes	no	1.3	no	yes	yes	no	no	no	yes	no	no	no	no	no	no	yes	yes	yes	yes	no	no	no	no	0	2	0	2	0	4	high
80	no	M	no	no	no	yes	no	no	no	no	no	no	yes	1.7	no	no	0.1	no	no	yes	yes	no	no	no	no	yes	yes	no	yes	no	yes	yes	yes	yes	no	no	no	no	0	2	0	2	0	4	high
75	no	M	no	no	no	no	no	no	no	no	no	no	yes	11.9	no	no	1.7	no	yes	yes	no	no	no	no	no	yes	no	yes	no	no	yes	yes	yes	yes	yes	yes	no	no	0	2	0	2	0	4	high
79	no	M	no	no	no	yes	yes	no	no	no	no	no	yes	2.2	no	no	5.6	yes	yes	yes	no	no	no	no	no	yes	no	yes	no	no	yes	yes	yes	yes	no	no	no	no	0	2	0	2	0	4	high
64	no	M	no	no	no	yes	no	no	no	no	no	no	yes	0.7	yes	no	1.2	no	no	yes	no	no	no	yes	no	no	no	no	no	no	yes	yes	yes	yes	no	no	no	no	0	2	0	2	0	4	high
87	no	M	no	no	no	yes	yes	no	no	no	no	no	yes	27	no	no	3.8	yes	no	yes	no	no	no	no	no	yes	no	no	yes	no	yes	yes	yes	yes	yes	yes	no	no	0	2	0	2	0	4	high
80	no	M	no	no	no	yes	no	no	no	no	no	no	yes	2.8	no	no	2.3	no	no	yes	no	no	no	yes	no	no	no	no	no	no	yes	yes	yes	yes	no	no	no	no	0	2	0	2	0	4	high
76	no	M	no	no	no	yes	no	no	no	no	no	no	yes	0.6	yes	no	2	no	yes	yes	no	no	no	no	no	no	no	no	no	no	yes	yes	yes	yes	no	no	no	no	0	2	0	2	0	4	high
63	no	M	no	no	no	yes	no	no	no	no	no	no	yes	14.8	no	no	1.1	no	yes	yes	no	no	no	no	no	yes	no	yes	no	no	yes	yes	yes	yes	no	no	no	no	0	2	0	2	0	4	high
77	no	M	no	no	no	yes	no	no	no	no	no	no	yes	1.1	yes	no	5	yes	no	no	no	no	no	no	no	yes	no	no	yes	yes	yes	yes	yes	yes	yes	yes	no	no	0	2	0	2	0	4	high
52	no	M	no	no	no	yes	no	no	no	no	no	no	yes	3.5	no	no	5.5	yes	no	yes	no	no	no	no	no	yes	no	no	yes	no	yes	yes	yes	yes	no	no	no	no	0	2	0	2	0	4	high
21	yes	M	no	no	no	yes	no	no	no	no	no	no	yes	1	yes	no	1.9	no	no	yes	no	no	no	no	no	yes	no	yes	no	no	yes	yes	yes	yes	yes	yes	no	no	0	2	0	2	0	4	high
69	no	M	no	no	no	yes	no	no	no	no	yes	no	yes	0.7	yes	no	1.6	no	no	yes	yes	no	no	yes	no	no	no	no	no	no	yes	yes	yes	yes	no	no	no	no	0	2	0	2	0	4	high
63	no	M	no	no	no	yes	no	no	no	no	no	no	yes	0.7	yes	no	1.5	no	no	no	no	no	no	no	no	no	no	no	no	no	yes	yes	yes	yes	no	no	no	no	0	2	0	2	0	4	high
66	no	M	no	no	no	yes	no	no	no	no	no	no	yes	7.2	no	no	1.2	no	no	yes	no	no	no	no	no	yes	no	no	yes	no	yes	yes	yes	yes	no	no	no	no	0	2	0	2	0	4	high
57	no	M	no	no	no	yes	no	no	no	no	no	no	yes	1.1	yes	no	2.1	no	no	yes	no	no	no	no	no	yes	no	yes	no	no	yes	yes	yes	yes	yes	yes	no	no	0	2	0	2	0	4	high
65	no	M	no	no	no	yes	no	no	no	no	no	no	yes	0.5	yes	no	2.6	no	no	yes	no	no	no	yes	no	no	no	no	no	no	yes	yes	yes	yes	yes	no	yes	no	0	2	0	2	0	4	high
75	no	M	no	no	no	yes	yes	no	no	no	no	no	yes	12.6	no	no	6.4	yes	no	yes	no	no	no	no	no	yes	no	yes	no	no	yes	yes	yes	yes	no	no	no	no	0	2	0	2	0	4	high
65	no	M	no	no	no	yes	no	no	no	no	no	no	yes	17.1	no	no	2.2	no	no	yes	no	no	no	no	no	yes	no	yes	no	no	yes	yes	yes	yes	no	no	no	no	0	2	0	2	0	4	high
79	no	M	no	no	no	yes	no	no	no	no	no	no	yes	4.9	no	no	0.8	no	no	yes	no	no	no	no	no	yes	no	yes	no	no	yes	yes	yes	yes	yes	yes	no	no	0	2	0	2	0	4	high
57	no	M	no	no	no	no	no	no	no	no	no	no	yes	3.1	no	no	1.2	no	no	yes	no	no	no	no	no	no	no	no	no	no	yes	yes	yes	yes	no	no	no	no	0	2	0	2	0	4	high
65	no	F	yes	no	no	no	yes	no	no	no	no	no	yes	1	yes	no	13.5	yes	no	no	no	no	no	no	no	no	no	no	no	no	no	yes	no	no	no	no	no	no	1	2	0	2	0	5	high
61	no	F	yes	no	no	yes	no	no	no	no	no	no	yes	0.44	yes	no	0.9	no	no	no	no	no	no	no	no	no	no	no	no	no	no	yes	no	no	no	no	no	no	1	2	0	2	0	5	high
73	no	F	yes	no	no	no	no	no	no	no	yes	no	yes	0.5	yes	no			no	yes	no	no	no	yes	no	no	no	no	no	no	no	yes	no	no	yes	yes	no	no	1	2	0	2	0	5	high
60	no	F	yes	no	no	yes	no	no	no	no	no	no	yes	0.7	yes	no	8.8	yes	no	no	no	no	no	no	no	no	no	no	no	no	no	yes	no	no	yes	yes	no	no	1	2	0	2	0	5	high
80	no	F	yes	no	no	yes	no	yes	no	no	no	no	yes	0.7	yes	yes	5	yes	yes	no	no	no	no	no	no	no	no	no	no	no	no	yes	yes	no	yes	yes	no	no	1	2	-2	2	2	5	high
64	no	F	yes	yes	no	no	no	no	no	no	no	no	yes	1.1	yes	no	1.77	no	no	yes	yes	no	no	yes	no	no	no	no	no	no	yes	yes	no	no	yes	yes	no	no	1	2	0	2	0	5	high
77	no	F	yes	no	no	yes	no	no	no	no	no	no	yes	0.59	yes	no	3	no	yes	no	no	no	no	no	no	yes	no	no	no	no	yes	yes	no	no	no	no	no	no	1	2	0	2	0	5	high
89	no	F	yes	no	no	yes	no	no	no	no	no	no	yes	0.9	yes	no	3	no	no	yes	no	no	no	no	no	no	no	no	no	no	yes	yes	no	no	no	no	no	no	1	2	0	2	0	5	high
70	no	F	yes	no	no	no	no	no	no	no	no	no	yes	13.7	no	no	1.2	no	no	yes	no	no	no	no	no	yes	no	yes	no	no	yes	yes	no	no	no	no	no	no	1	2	0	2	0	5	high
91	no	F	yes	no	no	no	no	no	no	no	no	no	yes	0.7	yes	no	1.44	no	no	no	no	no	no	no	no	no	no	no	no	no	yes	yes	no	no	no	no	no	no	1	2	0	2	0	5	high
39	yes	F	yes	no	no	yes	no	no	no	no	no	no	yes	1.45	no	no	1	no	no	yes	no	no	no	no	no	no	no	no	no	no	yes	yes	no	no	no	no	no	no	1	2	0	2	0	5	high
66	no	F	yes	no	no	no	no	no	no	no	no	no	yes	0.7	yes	no	1.96	no	no	no	no	no	no	no	no	no	no	no	no	no	yes	yes	no	no	no	no	no	no	1	2	0	2	0	5	high
76	no	F	yes	no	no	yes	no	no	no	no	no	no	yes	0.5	yes	no	3.8	yes	no	yes	no	no	no	yes	no	no	no	no	no	no	yes	yes	no	no	yes	yes	no	no	1	2	0	2	0	5	high
74	no	F	yes	no	no	yes	no	no	no	no	no	no	yes	1.05	yes	no	1.3	no	yes	yes	no	no	yes	yes	no	no	no	no	no	no	yes	yes	no	no	no	no	no	no	1	2	0	2	0	5	high
84	no	F	yes	no	no	no	no	no	no	no	no	no	yes	4.5	no	no	6.2	yes	no	yes	no	no	no	no	no	yes	no	no	yes	no	yes	yes	no	no	yes	yes	no	no	1	2	0	2	0	5	high
84	no	F	yes	no	no	no	no	no	no	no	no	no	yes	12.7	no	no	2.3	no	no	yes	no	no	no	no	no	yes	yes	no	yes	no	yes	yes	no	no	yes	yes	no	no	1	2	0	2	0	5	high
93	no	F	yes	no	no	yes	yes	no	no	no	no	no	yes	5.39	no	no	6.5	yes	yes	no	yes	no	no	no	no	yes	no	yes	no	no	yes	yes	no	no	no	no	no	no	1	2	0	2	0	5	high
96	no	F	yes	no	no	yes	no	no	no	no	no	no	yes	0.89	yes	no	2.6	no	yes	yes	no	no	no	yes	no	no	no	no	no	no	yes	yes	no	no	no	no	no	no	1	2	0	2	0	5	high
79	no	F	yes	no	no	yes	no	no	no	no	no	no	yes	2.2	no	no	2.6	no	no	no	no	no	no	no	no	no	no	no	no	no	yes	yes	no	no	no	no	no	no	1	2	0	2	0	5	high
79	no	F	yes	no	no	yes	no	no	no	no	no	no	yes	15.58	no	no	1.2	no	yes	yes	no	no	no	no	no	yes	no	yes	no	no	yes	yes	no	no	no	no	no	no	1	2	0	2	0	5	high
92	no	F	yes	no	no	yes	no	no	no	no	yes	no	yes	0.95	yes	no	0	no	yes	yes	no	no	yes	yes	no	no	no	yes	no	no	yes	yes	no	no	no	no	no	no	1	2	0	2	0	5	high
73	no	F	yes	no	yes	yes	no	no	no	no	no	no	yes	1.17	yes	no	1.3	no	no	yes	no	no	no	no	no	yes	no	yes	no	no	yes	yes	no	no	no	no	no	no	1	2	0	2	0	5	high
59	no	F	yes	no	no	no	no	no	no	no	no	no	yes	0.47	yes	no	1.6	no	no	yes	no	no	no	yes	no	yes	no	yes	no	no	yes	yes	no	no	no	no	no	no	1	2	0	2	0	5	high
82	no	F	yes	no	yes	yes	yes	no	no	no	no	no	yes	2.62	no	no	8	yes	no	yes	no	no	no	no	no	yes	no	no	yes	yes	yes	yes	no	no	no	no	no	no	1	2	0	2	0	5	high
90	no	F	yes	no	no	yes	no	no	no	no	yes	no	yes	0.9	yes	no	1.8	no	no	yes	no	no	yes	yes	no	no	no	no	no	no	yes	yes	no	no	no	no	no	no	1	2	0	2	0	5	high
78	no	F	yes	no	no	yes	no	no	no	no	no	no	yes	2.9	no	no	3	no	yes	yes	no	no	no	no	no	yes	no	yes	no	no	yes	yes	no	no	yes	yes	no	no	1	2	0	2	0	5	high
88	no	F	yes	no	no	yes	no	no	no	no	no	no	yes	8.6	no	no	1.9	no	no	yes	no	no	no	no	no	yes	no	no	yes	no	yes	yes	no	no	no	no	no	no	1	2	0	2	0	5	high
67	no	F	yes	no	no	yes	no	no	no	no	no	no	yes	0.4	yes	no	1.7	no	no	yes	no	no	no	yes	no	no	no	no	no	no	yes	yes	no	no	no	no	no	no	1	2	0	2	0	5	high
87	no	F	yes	no	yes	yes	yes	no	no	no	no	no	yes	4.04	no	no	1.8	no	no	yes	no	no	no	no	no	yes	no	no	yes	no	yes	yes	no	no	yes	no	yes	no	1	2	0	2	0	5	high
45	yes	F	yes	no	no	yes	no	no	no	no	no	no	yes	1.5	no	no			no	yes	no	no	no	yes	no	no	no	no	no	no	yes	yes	no	no	no	no	no	no	1	2	0	2	0	5	high
81	no	F	yes	no	yes	yes	yes	no	no	no	no	no	yes	6.04	no	no	5.8	yes	no	yes	no	no	no	no	no	yes	no	yes	no	no	yes	yes	no	no	no	no	no	no	1	2	0	2	0	5	high
91	no	F	yes	no	no	yes	no	no	no	no	no	no	yes	25.1	no	no			no	yes	no	no	no	no	no	yes	no	yes	no	no	yes	yes	no	no	no	no	no	no	1	2	0	2	0	5	high
88	no	F	yes	no	no	no	no	no	no	no	no	no	yes	1.3	no	no	1.2	no	yes	yes	no	no	no	yes	no	no	no	no	no	no	yes	yes	no	no	no	no	no	no	1	2	0	2	0	5	high
63	no	F	yes	no	no	yes	no	no	no	no	no	no	yes	2.2	no	no	2.1	no	no	yes	no	no	no	yes	no	no	no	no	no	no	yes	yes	no	no	yes	no	no	yes	1	2	0	2	0	5	high
79	no	F	yes	no	no	yes	yes	no	no	no	no	no	yes	1.5	no	no	8	yes	no	yes	no	no	no	no	no	yes	no	yes	no	no	yes	yes	no	no	no	no	no	no	1	2	0	2	0	5	high
54	no	F	yes	no	no	yes	no	no	no	no	no	no	yes	0.9	yes	no	0	no	no	yes	no	no	no	no	no	yes	no	yes	no	no	yes	yes	no	no	no	no	no	no	1	2	0	2	0	5	high
76	no	F	yes	no	no	yes	no	no	no	no	no	no	yes	1	yes	no	1	no	no	yes	no	no	no	no	no	no	no	no	no	no	yes	yes	no	no	no	no	no	no	1	2	0	2	0	5	high
82	no	F	yes	no	no	yes	yes	no	no	no	no	no	yes	8.6	no	no	7.3	yes	no	yes	no	no	no	no	no	yes	no	yes	no	no	yes	yes	no	no	no	no	no	no	1	2	0	2	0	5	high
20	yes	F	yes	no	no	yes	no	no	no	no	no	no	yes	3.9	no	no	1	no	no	yes	no	no	no	yes	no	no	no	no	no	no	yes	yes	no	no	no	no	no	no	1	2	0	2	0	5	high
89	no	F	yes	no	no	yes	no	no	no	no	no	no	yes	1.8	no	no	2.2	no	no	yes	no	no	no	yes	no	no	no	no	no	no	yes	yes	no	no	no	no	no	no	1	2	0	2	0	5	high
17	yes	F	yes	no	no	yes	no	no	no	no	no	no	yes	5.5	no	no	1.7	no	no	yes	no	no	no	no	no	yes	no	no	yes	no	yes	yes	no	no	yes	yes	no	no	1	2	0	2	0	5	high
76	no	F	yes	no	no	yes	no	no	no	no	no	no	yes	0.8	yes	no	1.8	no	no	yes	no	no	no	yes	no	no	no	no	no	no	yes	yes	no	no	no	no	no	no	1	2	0	2	0	5	high
68	no	F	yes	no	no	yes	yes	no	no	no	no	no	yes	2.6	no	no	3.7	yes	no	yes	no	no	no	no	no	yes	no	yes	no	no	yes	yes	no	no	no	no	no	no	1	2	0	2	0	5	high
37	yes	F	yes	no	no	yes	yes	no	no	no	no	no	yes	9.4	no	no	9.9	yes	no	yes	no	no	no	no	no	yes	no	yes	no	no	yes	yes	no	no	no	no	no	no	1	2	0	2	0	5	high
72	no	F	yes	no	no	yes	no	no	R-Y	yes	no	no	yes	1.3	no	no	1.4	no	no	yes	no	no	no	no	no	yes	no	yes	no	no	yes	yes	no	no	yes	yes	no	no	1	2	0	2	0	5	high
75	no	F	yes	no	no	yes	no	no	B-II	yes	no	no	yes	1.69	no	no			no	no	no	no	no	no	no	yes	no	yes	no	no	yes	yes	yes	yes	no	no	no	no	1	2	0	2	0	5	high
89	no	F	yes	yes	no	no	no	no	no	no	no	no	yes	1	yes	no	1.22	no	no	yes	yes	no	no	no	no	no	no	no	no	no	yes	yes	yes	yes	no	no	no	no	1	2	0	2	0	5	high
85	no	F	yes	no	no	yes	no	no	no	no	no	no	yes	2.62	no	no	4.3	yes	no	yes	no	no	no	yes	no	yes	no	yes	no	no	yes	yes	yes	yes	no	no	no	no	1	2	0	2	0	5	high
70	no	F	yes	no	no	yes	no	no	no	no	no	no	yes	0.4	yes	no	5.1	yes	no	no	no	no	no	no	no	yes	no	yes	no	no	yes	yes	yes	yes	no	no	no	no	1	2	0	2	0	5	high
69	no	F	yes	no	no	no	no	no	no	no	no	no	yes	4.8	no	no	2.4	no	no	yes	no	no	no	yes	no	no	no	no	no	no	yes	yes	yes	yes	no	no	no	no	1	2	0	2	0	5	high
84	no	F	yes	no	no	yes	no	no	no	no	no	no	yes	3.84	no	no			yes	yes	no	no	no	no	no	yes	no	yes	no	no	yes	yes	yes	yes	no	no	no	no	1	2	0	2	0	5	high
89	no	F	yes	no	yes	no	yes	no	no	no	no	no	yes	12.9	no	no	12.5	yes	no	yes	yes	no	no	no	no	yes	no	yes	no	no	yes	yes	yes	yes	no	no	no	no	1	2	0	2	0	5	high
89	no	F	yes	no	no	no	no	no	no	no	no	no	yes	12.8	no	no	1.3	no	yes	no	no	no	no	no	no	no	no	no	no	no	yes	yes	yes	yes	no	no	no	no	1	2	0	2	0	5	high
91	no	F	yes	no	yes	no	no	no	no	no	no	no	yes	14.8	no	no	0.9	no	no	yes	no	no	no	no	no	yes	yes	yes	no	no	yes	yes	yes	yes	no	no	no	no	1	2	0	2	0	5	high
88	no	F	yes	no	no	no	no	no	no	no	no	no	yes	1.58	no	no	1.9	no	no	yes	no	no	no	no	no	no	no	no	no	no	yes	yes	yes	yes	no	no	no	no	1	2	0	2	0	5	high
82	no	F	yes	no	no	no	yes	no	no	no	yes	no	yes	9.76	no	no	11.2	yes	no	yes	no	no	no	no	no	yes	no	no	yes	no	yes	yes	yes	yes	no	no	no	no	1	2	0	2	0	5	high
90	no	F	yes	no	no	yes	no	no	no	no	no	no	yes	2.18	no	no	1	no	no	yes	no	no	no	no	no	yes	no	yes	no	no	yes	yes	yes	yes	no	no	no	no	1	2	0	2	0	5	high
72	no	F	yes	no	no	no	no	no	no	no	no	no	yes	0.8	yes	no	0.9	no	no	yes	no	no	no	yes	no	no	no	no	no	no	yes	yes	yes	yes	yes	yes	no	no	1	2	0	2	0	5	high
91	no	F	yes	no	yes	no	no	no	no	no	yes	no	yes	1.8	no	no	0.5	no	no	yes	yes	no	no	yes	no	no	no	no	no	no	yes	yes	yes	yes	no	no	no	no	1	2	0	2	0	5	high
89	no	F	yes	no	no	yes	yes	no	no	no	no	no	yes	4.61	no	no	0	no	no	no	no	no	no	no	no	no	no	no	no	no	yes	yes	yes	yes	no	no	no	no	1	2	0	2	0	5	high
92	no	F	yes	no	no	no	no	no	no	no	no	no	yes	3.71	no	no	1.6	no	yes	yes	no	no	no	yes	no	no	no	no	no	no	yes	yes	yes	yes	no	no	no	no	1	2	0	2	0	5	high
78	no	F	yes	no	no	yes	no	no	no	no	no	no	yes	3.17	no	no	2.1	no	no	yes	no	no	no	yes	no	no	no	no	no	no	yes	yes	yes	yes	no	no	no	no	1	2	0	2	0	5	high
86	no	F	yes	no	no	yes	no	no	no	no	no	no	yes	0.8	yes	no	1.2	no	no	yes	no	no	no	yes	no	no	no	no	no	no	yes	yes	yes	yes	no	no	no	no	1	2	0	2	0	5	high
88	no	F	yes	no	no	yes	no	no	no	no	no	no	yes	9.7	no	no	2.9	no	no	yes	no	no	no	no	no	yes	no	yes	no	no	yes	yes	yes	yes	no	no	no	no	1	2	0	2	0	5	high
93	no	F	yes	yes	no	yes	yes	no	no	no	no	no	yes	7.95	no	no	2.5	no	no	yes	no	no	no	no	no	yes	no	yes	no	no	yes	yes	yes	yes	yes	yes	no	no	1	2	0	2	0	5	high
91	no	F	yes	no	no	yes	no	no	no	no	no	no	yes	5.3	no	no	1.5	no	no	no	no	no	no	no	no	yes	no	yes	no	no	yes	yes	yes	yes	no	no	no	no	1	2	0	2	0	5	high
91	no	F	yes	no	yes	yes	no	no	no	no	no	no	yes	2.81	no	no			no	no	no	no	no	no	no	yes	no	yes	no	no	yes	yes	yes	yes	no	no	no	no	1	2	0	2	0	5	high
81	no	F	yes	no	no	yes	no	no	no	no	no	no	yes	0.5	yes	no	10.8	yes	yes	no	no	no	no	no	no	yes	no	no	yes	yes	yes	yes	yes	yes	no	no	no	no	1	2	0	2	0	5	high
45	yes	F	yes	no	no	yes	no	no	no	no	no	no	yes	3	no	no	1.2	no	no	yes	no	no	no	yes	no	no	no	no	no	no	yes	yes	yes	yes	yes	yes	no	no	1	2	0	2	0	5	high
72	no	F	yes	no	no	yes	no	no	no	no	no	no	yes	0.5	yes	no	2.5	no	yes	yes	no	no	no	yes	no	no	no	no	no	no	yes	yes	yes	yes	no	no	no	no	1	2	0	2	0	5	high
83	no	F	yes	no	no	yes	no	no	no	no	no	no	yes	0.5	yes	no	0	no	yes	yes	no	no	no	no	no	yes	no	yes	no	no	yes	yes	yes	yes	no	no	no	no	1	2	0	2	0	5	high
66	no	F	yes	no	no	yes	no	no	no	no	no	no	yes	0.3	yes	no	4.4	yes	no	no	no	no	no	no	no	yes	no	yes	no	no	yes	yes	yes	yes	no	no	no	no	1	2	0	2	0	5	high
54	no	F	yes	no	no	yes	no	no	no	no	no	no	yes	0.8	yes	no	0	no	yes	no	no	no	no	no	yes	yes	no	yes	no	no	yes	yes	yes	yes	yes	yes	no	no	1	2	0	2	0	5	high
73	no	F	yes	no	no	yes	no	no	no	no	no	no	yes	4.1	no	no	3.3	yes	no	yes	no	no	no	no	no	yes	no	no	yes	no	yes	yes	yes	yes	no	no	no	no	1	2	0	2	0	5	high
79	no	F	yes	no	no	yes	no	no	no	no	no	no	yes	0.9	yes	no	3.1	yes	no	yes	no	no	no	no	no	yes	no	yes	no	no	yes	yes	yes	yes	no	no	no	no	1	2	0	2	0	5	high
75	no	F	yes	no	no	yes	no	no	no	no	no	no	yes	0.5	yes	no			no	yes	no	no	no	yes	no	no	no	no	no	no	yes	yes	yes	yes	no	no	no	no	1	2	0	2	0	5	high
99	no	F	yes	no	no	yes	no	no	no	no	no	no	yes			no	1.1	no	no	yes	no	no	yes	yes	no	no	no	no	no	no	yes	yes	yes	yes	no	no	no	no	1	2	0	2	0	5	high
81	no	F	yes	no	no	yes	yes	no	no	no	no	no	yes	11.6	no	no	5.6	yes	no	yes	no	no	no	no	no	yes	no	no	yes	no	yes	yes	yes	yes	no	no	no	no	1	2	0	2	0	5	high
74	no	F	yes	no	no	yes	no	no	no	no	no	no	yes			no	2.2	no	no	yes	no	no	no	yes	no	no	no	no	no	no	yes	yes	yes	yes	no	no	no	no	1	2	0	2	0	5	high
61	no	F	yes	no	no	yes	no	no	no	no	no	no	yes	1.2	yes	no	1.9	no	no	yes	no	no	no	no	no	yes	no	yes	no	no	yes	yes	yes	yes	no	no	no	no	1	2	0	2	0	5	high
79	no	F	yes	no	no	yes	no	no	no	no	no	no	yes	0.6	yes	no	2.5	no	no	yes	no	no	no	no	no	yes	no	no	no	no	yes	yes	yes	yes	no	no	no	no	1	2	0	2	0	5	high
75	no	F	yes	no	no	yes	no	no	no	no	no	no	yes	0.8	yes	no	2.1	no	yes	yes	no	no	no	no	no	yes	no	yes	no	no	yes	yes	yes	yes	no	no	no	no	1	2	0	2	0	5	high
45	yes	F	yes	no	no	yes	no	no	no	no	no	no	yes	1	yes	no	1.1	no	yes	yes	no	no	no	no	no	no	no	no	no	no	yes	yes	yes	yes	yes	no	yes	no	1	2	0	2	0	5	high
73	no	M	no	no	no	yes	no	yes	B-I	yes	no	no	yes	0.68	yes	no	8.1	yes	no	no	no	no	no	no	no	no	no	no	no	no	no	yes	no	no	no	no	no	no	0	2	0	2	2	6	high
80	no	M	no	no	no	yes	no	yes	no	no	no	no	yes			no	21.5	yes	no	no	no	no	no	no	no	no	no	no	no	no	no	yes	no	no	no	no	no	no	0	2	0	2	2	6	high
71	no	M	no	no	no	yes	no	yes	no	no	no	no	yes	0.6	yes	no	8.1	yes	no	no	no	no	no	no	no	no	no	no	no	no	no	yes	no	no	no	no	no	no	0	2	0	2	2	6	high
67	no	M	no	no	yes	no	no	yes	no	no	yes	no	yes	0.9	yes	no	11.1	yes	no	no	no	no	no	no	no	no	no	no	no	no	no	yes	yes	no	no	no	no	no	0	2	0	2	2	6	high
57	no	M	no	no	no	yes	no	yes	no	no	no	no	yes	0.55	yes	no	4.9	yes	no	no	no	no	no	no	no	no	no	no	no	no	no	yes	yes	no	no	no	no	no	0	2	0	2	2	6	high
73	no	M	no	no	no	yes	no	yes	no	no	no	no	yes	0.7	yes	no	3.3	yes	yes	no	no	no	no	no	no	no	no	no	no	no	no	yes	yes	no	yes	yes	no	no	0	2	0	2	2	6	high
73	no	M	no	no	no	yes	no	yes	no	no	no	no	yes	0.5	yes	no	11.9	yes	no	no	no	no	no	no	no	no	no	no	no	no	no	yes	yes	no	yes	yes	no	no	0	2	0	2	2	6	high
55	no	M	no	no	no	yes	no	yes	no	no	no	no	yes	0.9	yes	no	3.9	yes	no	no	no	no	no	no	no	no	no	no	no	no	no	yes	yes	no	no	no	no	no	0	2	0	2	2	6	high
45	yes	M	no	no	no	yes	no	yes	no	no	no	no	yes	0.7	yes	no	6.8	yes	no	no	no	no	no	no	no	no	no	no	no	no	no	yes	yes	no	yes	yes	no	no	0	2	0	2	2	6	high
77	no	F	yes	no	no	yes	no	yes	no	no	no	no	yes	2.5	no	no	3.1	yes	no	no	no	no	no	no	no	no	no	no	no	no	no	yes	no	no	no	no	no	no	1	2	0	2	2	7	high
80	no	F	yes	no	no	yes	no	yes	no	no	no	no	yes	0.7	yes	no	11.7	yes	no	no	no	no	no	no	no	no	no	no	no	no	no	yes	no	no	no	no	no	no	1	2	0	2	2	7	high
72	no	F	yes	no	no	yes	no	yes	no	no	no	no	yes	0.9	yes	no	1.8	no	no	no	no	no	no	no	no	no	no	no	no	no	no	yes	yes	no	no	no	no	no	1	2	0	2	2	7	high
82	no	F	yes	no	no	yes	no	yes	no	no	no	no	yes	19	no	no	7.3	yes	no	yes	no	no	no	no	no	yes	no	yes	no	no	yes	yes	no	no	yes	yes	no	no	1	2	0	2	2	7	high
66	no	M	no	no	no	no	no	no	no	no	no	no	no	4	no				no	no	no	no	no	no	no	yes	no	yes	no	no	no	no	no	no	no	no	no	no
68	no	M	no	no	no	no	no	no	no	no	no	no	no	3	no				no	no	no	no	no	yes	no	no	no	no	no	no	no	no	no	no	no	no	no	no
78	no	M	no	no	no	yes	no	no	no	no	no	no	no	0.6	yes				yes	yes	no	no	no	no	no	yes	no	no	no	no	no	no	no	no	no	no	no	no
87	no	M	no	no	no	yes	no	no	no	no	no	no	no	0.5	yes				no	no	no	no	no	yes	no	no	no	no	no	no	no	no	no	no	no	no	no	no
53	no	M	no	no	no	yes	no	no	no	no	no	no	no	1.4	no				no	no	no	no	no	yes	no	yes	no	yes	no	no	no	no	no	no	no	no	no	no
40	yes	M	no	no	no	no	no	no	no	no	no	no	no	1.9	no				no	no	no	no	no	no	no	yes	yes	yes	no	no	no	no	no	no	no	no	no	no
67	no	M	no	no	no	yes	no	no	no	no	no	no	no						no	yes	no	no	yes	yes	no	no	no	no	no	no	no	no	no	no	no	no	no	no
67	no	M	no	no	no	yes	no	no	no	no	no	no	no						no	no	no	no	yes	yes	no	yes	no	yes	no	no	no	no	no	no	no	no	no	no
78	no	M	no	no	no	yes	no	no	no	no	no	no	no	3.7	no				no	no	no	no	no	yes	no	yes	no	yes	no	no	no	no	no	no	no	no	no	no
73	no	M	no	no	no	no	no	no	no	no	no	no	yes	0.5	yes				no	no	no	no	no	no	no	no	no	no	no	no	no	yes	yes	no	no	no	no	no
84	no	F	yes	no	no	yes	no	no	no	no	no	no	yes	0.5	yes				no	yes	no	no	no	no	no	yes	no	no	yes	no	no	no	no	no	no	no	no	no
88	no	F	yes	no	no	yes	no	no	no	no	no	no	no	3	no				no	no	no	no	no	no	no	yes	no	yes	no	no	no	no	no	no	no	no	no	no
69	no	F	yes	no	no	yes	no	no	no	no	no	no	no						no	no	no	no	yes	yes	no	no	no	no	no	no	no	no	no	no	no	no	no	no
67	no	F	yes	no	no	yes	no	no	no	no	no	no	no	0.5	yes				yes	no	no	no	no	no	no	yes	no	yes	no	no	no	no	no	no	no	no	no	no
81	no	F	yes	no	no	no	no	no	no	no	no	no	no						no	no	no	no	no	no	no	no	no	no	no	no	no	yes	yes	no	no	no	no	no
65	no	M	no	no	no	no	no	no	R-Y	yes	no	no	no	0.7	yes				no	no	no	no	no	no	no	no	no	no	no	no	no	no	no	no	no	no	no	no
82	no	M	no	no	no	yes	no	no	R-Y	yes	no	no	no	0.7	yes				no	no	no	no	no	no	no	yes	no	no	yes	yes	no	no	no	no	no	no	no	no
85	no	F	yes	no	no	yes	no	no	R-Y	yes	no	no	yes	1.4	no				no	yes	no	no	yes	yes	no	yes	no	yes	no	no	no	no	no	no	no	no	no	no
37	yes	M	no	no	no	no	no	no	no	no	no	no	yes						no	no	no	no	no	no	no	no	no	no	no	no	yes	yes	no	no	no	no	no	no
76	no	M	no	no	no	yes	no	no	no	no	no	no	yes	1.7	no				no	no	no	no	no	no	yes	yes	no	yes	no	no	yes	yes	yes	yes	no	no	no	no
39	yes	M	no	no	no	yes	no	no	no	no	no	no	yes	0.6	yes				no	no	no	no	no	no	yes	yes	no	yes	no	no	yes	yes	yes	yes	no	no	no	no
72	no	F	yes	no	no	yes	no	no	no	no	no	no	no	0.5	yes				no	no	no	no	no	no	no	no	no	no	no	no	yes	yes	yes	yes	no	no	no	no
74	no	F	yes	no	no	yes	no	no	no	no	no	no	no	0.5	yes				no	no	no	no	no	no	no	no	no	no	no	no	yes	yes	yes	yes	no	no	no	no
61	no	F	yes	no	no	yes	no	no	no	no	no	no	yes	1	yes				yes	yes	no	no	no	yes	no	no	no	no	no	no	yes	yes	yes	yes	no	no	no	no
47	yes	M	no	no	no	yes	no	no	no	no	no	no	yes	0.7	yes				no	yes	yes	yes	no	yes	no	no	no	no	no	no	yes	yes	yes	yes	no	no	no	no

## Sheet: Validation cohort
Age	Sex	Intravenous hydration	NSAID suppository	Protease inhibitor	Pancreatic cancer	IPMN	History of gastrectomy	History of gastrectomy	History of pancreatitis	History of PEP	Native papilla of Vater	Total bilirubin（mg/dl）	Pancreatic carcification	Diameter of the MPD（mm）	Periampullary diverticulum	EST	Precut sphincterotomy	EPBD	EPLBD	Biliary stone removal	Ampllectomy	Biiliary stent	Biliary stent above the papilla	Plastic stent	SEMS	CSEMS	Inadvertent pancreatic duct cannulation	Procedures on the pancreatic duct	Pancreatic stent	Prophyractic pancreatic stent	PEP	Mild PEP	Moderate PEP	Severe PEP	Female point	Native papilla of Vater point	Pancreatic calcification point	Procedures on the pancreatic duct point	IPMN point	Risk score	Risk classification
61	M	no	no	yes	yes	no	no	no	no	no	no	1.91	yes	10	no	no	no	no	no	no	no	yes	no	no	no	no	no	no	no	no	no	no	no	no	0	0	-2	0	0	-2	low
67	M	no	no	yes	no	no	no	no	no	no	no	16.6	yes	1.2	no	no	no	no	no	no	no	yes	no	yes	no	no	no	no	no	no	no	no	no	no	0	0	-2	0	0	-2	low
71	M	no	no	yes	no	no	no	no	no	no	no	2	yes	1.5	no	no	no	no	no	no	no	yes	no	yes	no	no	no	no	no	no	no	no	no	no	0	0	-2	0	0	-2	low
65	M	no	no	yes	no	no	no	no	no	no	no	8.7	yes	1.6	no	no	no	no	no	no	no	yes	yes	no	yes	no	no	no	no	no	no	no	no	no	0	0	-2	0	0	-2	low
66	M	no	no	yes	yes	no	no	no	no	no	no	3.81	yes	10	no	no	no	no	no	no	no	yes	no	no	yes	yes	no	no	no	no	no	no	no	no	0	0	-2	0	0	-2	low
67	M	no	no	yes	no	no	no	no	no	no	no	13.9	yes	1.8	yes	no	no	no	no	no	no	yes	no	yes	no	no	no	no	no	no	no	no	no	no	0	0	-2	0	0	-2	low
71	M	no	yes	no	no	no	no	no	no	no	no	1.4	yes		yes	no	no	no	no	yes	no	no	no	no	no	no	no	no	no	no	no	no	no	no	0	0	-2	0	0	-2	low
65	M	no	no	yes	no	no	no	no	no	no	no	1.4	yes	0.9	no	no	no	no	no	no	no	yes	no	yes	no	no	no	no	no	no	no	no	no	no	0	0	-2	0	0	-2	low
65	M	no	no	yes	no	no	no	no	no	no	no	5.6	yes	1.6	no	no	no	no	no	no	no	yes	no	yes	no	no	no	no	no	no	no	no	no	no	0	0	-2	0	0	-2	low
76	M	no	no	yes	no	no	no	no	no	no	no	0.7	yes		no	no	no	no	no	yes	no	no	no	no	no	no	no	no	no	no	no	no	no	no	0	0	-2	0	0	-2	low
70	M	no	no	yes	no	no	no	no	no	no	no	0.7	yes	2.9	no	no	no	no	no	no	no	yes	no	yes	no	no	no	no	no	no	no	no	no	no	0	0	-2	0	0	-2	low
71	M	no	no	yes	no	no	no	no	no	no	no	1.1	yes	2.3	no	no	no	no	no	no	no	yes	no	yes	no	no	no	no	no	no	no	no	no	no	0	0	-2	0	0	-2	low
77	M	no	no	yes	no	no	no	no	no	no	no	1.4	yes		yes	no	no	no	no	no	no	yes	no	yes	no	no	no	no	no	no	no	no	no	no	0	0	-2	0	0	-2	low
71	M	no	no	yes	no	no	no	no	no	no	no	2.1	yes	1.8	no	no	no	no	no	no	no	yes	no	yes	no	no	no	no	no	no	no	no	no	no	0	0	-2	0	0	-2	low
69	M	no	no	yes	no	no	no	no	no	no	no	0.4	yes	2.6	no	no	no	no	no	no	no	yes	no	yes	no	no	no	no	no	no	no	no	no	no	0	0	-2	0	0	-2	low
85	M	no	no	no	no	no	no	no	no	no	no	1.6	yes	1	no	yes	no	no	no	yes	no	no	no	no	no	no	no	no	no	no	no	no	no	no	0	0	-2	0	0	-2	low
52	M	no	no	no	no	no	no	no	no	no	no	0.8	yes		no	no	no	no	no	no	no	yes	no	yes	no	no	no	no	no	no	no	no	no	no	0	0	-2	0	0	-2	low
65	M	no	no	yes	no	no	no	no	no	no	no	0.63	yes		no	no	no	no	no	yes	no	no	no	no	no	no	no	no	no	no	no	no	no	no	0	0	-2	0	0	-2	low
86	M	no	no	no	no	no	no	no	no	no	no	2.2	yes	7.2	no	no	no	no	no	no	no	yes	no	yes	no	no	no	no	no	no	no	no	no	no	0	0	-2	0	0	-2	low
85	M	no	no	no	no	no	no	no	no	yes	no	8.5	yes	1	no	no	no	no	no	no	no	no	no	no	no	no	no	no	no	no	no	no	no	no	0	0	-2	0	0	-2	low
75	M	no	no	yes	no	no	no	no	no	yes	no	1.01	yes	2.4	no	no	no	no	no	no	no	yes	no	no	yes	no	no	no	no	no	no	no	no	no	0	0	-2	0	0	-2	low
74	M	no	no	yes	no	no	no	no	no	yes	no	0.67	yes	2	no	no	no	no	no	no	no	yes	no	yes	no	no	no	no	no	no	no	no	no	no	0	0	-2	0	0	-2	low
75	M	no	no	yes	no	no	no	no	no	yes	no	0.52	yes	4.5	no	no	no	no	no	no	no	yes	no	no	yes	no	no	no	no	no	no	no	no	no	0	0	-2	0	0	-2	low
75	M	no	no	yes	no	no	no	no	no	yes	no	1.63	yes	3.9	no	no	no	no	no	no	no	yes	no	yes	no	no	no	no	no	no	no	no	no	no	0	0	-2	0	0	-2	low
75	M	no	no	yes	no	no	no	no	no	yes	no	1.24	yes	2.3	no	no	no	no	no	no	no	yes	no	yes	no	no	no	no	no	no	no	no	no	no	0	0	-2	0	0	-2	low
91	M	no	no	yes	no	no	no	no	no	no	no	1.9	yes	1.5	yes	no	no	no	no	no	no	yes	no	no	no	no	no	no	no	no	no	no	no	no	0	0	-2	0	0	-2	low
92	M	no	no	yes	no	no	no	no	no	no	no	0.8	yes	2.3	yes	no	no	no	no	no	no	yes	no	no	no	no	no	no	no	no	no	no	no	no	0	0	-2	0	0	-2	low
83	M	no	yes	no	no	no	no	no	no	no	no	2.2	yes	1.9	yes	no	no	no	yes	yes	no	no	no	no	no	no	no	no	no	no	no	no	no	no	0	0	-2	0	0	-2	low
76	M	no	no	yes	no	no	B-I	yes	no	no	no	2	yes	2.1	no	no	no	no	no	yes	no	no	no	no	no	no	no	no	no	no	no	no	no	no	0	0	-2	0	0	-2	low
84	M	no	no	yes	no	no	B-II	yes	no	yes	no		yes		no	no	no	no	no	yes	no	yes	no	yes	no	no	no	no	no	no	no	no	no	no	0	0	-2	0	0	-2	low
84	M	no	no	no	no	no	R-Y	yes	no	no	no	0.7	yes		no	no	no	no	yes	yes	no	no	no	no	no	no	no	no	no	no	no	no	no	no	0	0	-2	0	0	-2	low
84	M	no	no	yes	no	no	B-II	yes	no	yes	no	1.71	yes	2.8	no	no	no	yes	no	no	no	yes	no	yes	no	no	no	no	no	no	no	no	no	no	0	0	-2	0	0	-2	low
79	M	no	no	no	no	no	B-II	yes	no	no	no	0.5	yes	1.9	no	no	yes	yes	no	yes	no	yes	no	yes	no	no	no	no	no	no	no	no	no	no	0	0	-2	0	0	-2	low
100	F	no	no	yes	no	no	no	no	no	no	no	0.7	yes	0	no	no	no	no	no	yes	no	no	no	no	no	no	no	no	no	no	no	no	no	no	1	0	-2	0	0	-1	low
81	F	no	no	no	yes	no	no	no	no	no	no	4	yes	6	no	no	no	no	no	no	no	yes	no	no	yes	yes	no	no	no	no	no	no	no	no	1	0	-2	0	0	-1	low
80	F	no	no	yes	yes	no	no	no	no	no	no	14.5	yes		no	yes	yes	no	no	no	no	yes	no	yes	no	no	no	no	no	no	no	no	no	no	1	0	-2	0	0	-1	low
80	F	no	no	yes	yes	no	no	no	no	no	no	2.4	yes	6.4	no	no	no	no	no	no	no	yes	no	yes	no	no	no	no	no	no	no	no	no	no	1	0	-2	0	0	-1	low
58	F	no	no	yes	no	no	no	no	no	no	no	2.25	yes	4.7	yes	yes	no	no	no	no	no	yes	no	yes	no	no	no	no	no	no	no	no	no	no	1	0	-2	0	0	-1	low
86	M	no	no	no	no	no	no	no	no	no	no	1.5	no		no	no	no	no	no	no	no	yes	no	no	yes	no	no	no	no	no	no	no	no	no	0	0	0	0	0	0	low
73	M	no	no	yes	no	no	no	no	no	no	no	5.3	no	0	no	no	no	no	no	no	no	yes	no	yes	no	no	no	no	no	no	no	no	no	no	0	0	0	0	0	0	low
86	M	no	no	yes	no	no	no	no	no	no	no	2.21	no	2.6	no	no	no	no	no	no	no	yes	no	no	no	no	no	no	no	no	no	no	no	no	0	0	0	0	0	0	low
50	M	no	no	no	no	no	no	no	no	no	no	0.48	no	2.3	no	no	no	no	no	no	no	yes	no	yes	no	no	no	no	no	no	no	no	no	no	0	0	0	0	0	0	low
82	M	no	no	yes	no	no	no	no	no	no	no	1.9	no	0	yes	no	no	no	no	yes	no	no	no	no	no	no	no	no	no	no	no	no	no	no	0	0	0	0	0	0	low
71	M	no	no	yes	no	no	no	no	no	no	no	1.5	no	1.6	no	no	no	no	no	no	no	no	no	no	no	no	no	no	no	no	no	no	no	no	0	0	0	0	0	0	low
59	M	no	no	yes	yes	no	no	no	no	no	no	0.7	no	7.8	no	no	no	no	no	no	no	yes	no	yes	no	no	no	no	no	no	no	no	no	no	0	0	0	0	0	0	low
55	M	no	no	yes	yes	no	no	no	no	no	no	1.3	no	5.5	no	no	no	no	no	no	no	yes	no	yes	no	no	no	no	no	no	no	no	no	no	0	0	0	0	0	0	low
63	M	no	no	yes	no	no	no	no	no	no	no		no		no	no	no	no	no	no	no	yes	no	no	no	no	no	no	no	no	no	no	no	no	0	0	0	0	0	0	low
69	M	no	no	yes	no	no	no	no	no	no	no	2.57	no	7.2	no	no	no	no	no	no	no	yes	no	no	yes	yes	no	no	no	no	no	no	no	no	0	0	0	0	0	0	low
83	M	no	no	yes	no	no	no	no	no	no	no	3.5	no	1.6	yes	no	no	no	no	no	no	yes	no	no	yes	yes	no	no	no	no	no	no	no	no	0	0	0	0	0	0	low
88	M	no	no	yes	no	no	no	no	no	no	no	6.2	no	2.8	no	no	no	no	no	no	no	yes	no	no	yes	no	no	no	no	no	no	no	no	no	0	0	0	0	0	0	low
62	M	no	no	yes	no	no	no	no	no	no	no	1.2	no	2	yes	no	no	no	no	no	no	yes	no	no	yes	no	no	no	no	no	no	no	no	no	0	0	0	0	0	0	low
89	M	no	no	no	no	no	no	no	no	no	no	4	no		no	no	no	no	no	no	no	yes	no	no	yes	yes	no	no	no	no	no	no	no	no	0	0	0	0	0	0	low
81	M	no	no	yes	no	no	no	no	no	no	no	1.4	no		yes	no	no	no	no	yes	no	no	no	no	no	no	no	no	no	no	no	no	no	no	0	0	0	0	0	0	low
83	M	no	no	no	no	no	no	no	no	no	no	0.9	no	1.1	no	no	no	no	no	no	no	yes	yes	no	yes	no	no	no	no	no	no	no	no	no	0	0	0	0	0	0	low
88	M	no	no	yes	no	no	no	no	no	no	no	3.24	no	1.5	no	no	no	no	no	no	no	yes	yes	yes	no	no	no	no	no	no	no	no	no	no	0	0	0	0	0	0	low
63	M	no	no	yes	no	no	no	no	no	no	no	2.3	no	4.2	no	no	no	no	no	no	no	yes	no	yes	no	no	no	no	no	no	no	no	no	no	0	0	0	0	0	0	low
79	M	no	no	yes	yes	no	no	no	no	no	no	3.3	no	4.7	yes	no	no	no	no	no	no	yes	no	yes	no	no	no	no	no	no	no	no	no	no	0	0	0	0	0	0	low
58	M	no	no	yes	yes	no	no	no	no	no	no	1.7	no	7.5	no	no	no	no	no	no	no	yes	no	no	yes	no	no	no	no	no	no	no	no	no	0	0	0	0	0	0	low
57	M	no	no	yes	yes	no	no	no	no	no	no	1.2	no	9.4	no	no	no	no	no	no	no	yes	no	no	yes	yes	no	no	no	no	no	no	no	no	0	0	0	0	0	0	low
79	M	no	no	yes	no	no	no	no	no	no	no	9.9	no		no	no	no	no	no	no	no	yes	no	no	no	no	no	no	no	no	no	no	no	no	0	0	0	0	0	0	low
71	M	no	no	yes	no	no	no	no	no	no	no	3.89	no	2	no	no	no	no	no	no	no	yes	yes	yes	no	no	no	no	no	no	no	no	no	no	0	0	0	0	0	0	low
79	M	no	no	yes	no	no	no	no	no	no	no	5.92	no	3.5	no	no	no	no	no	no	no	yes	no	no	no	no	no	no	no	no	no	no	no	no	0	0	0	0	0	0	low
82	M	no	no	no	no	no	no	no	no	no	no	4.6	no	1.8	no	no	no	no	no	no	no	yes	no	no	yes	no	no	no	no	no	no	no	no	no	0	0	0	0	0	0	low
72	M	no	no	yes	no	no	no	no	no	no	no	3.1	no		no	no	no	no	no	yes	no	yes	no	yes	no	no	no	no	no	no	no	no	no	no	0	0	0	0	0	0	low
83	M	no	no	yes	no	no	no	no	no	no	no	1.7	no		yes	no	no	no	no	no	no	yes	no	yes	no	no	no	no	no	no	no	no	no	no	0	0	0	0	0	0	low
78	M	no	no	yes	no	no	no	no	no	no	no	4.3	no	5.1	no	no	no	no	no	no	no	yes	no	no	yes	no	no	no	no	no	no	no	no	no	0	0	0	0	0	0	low
86	M	no	no	no	no	no	no	no	no	no	no	2.9	no		yes	no	no	no	no	no	no	yes	no	yes	no	no	no	no	no	no	no	no	no	no	0	0	0	0	0	0	low
85	M	no	no	yes	no	no	no	no	no	no	no	1.04	no		yes	no	no	no	no	no	no	yes	no	yes	no	no	no	no	no	no	no	no	no	no	0	0	0	0	0	0	low
89	M	no	no	no	yes	no	no	no	no	no	no	5.6	no	3	no	yes	no	no	no	no	no	yes	no	no	yes	no	no	no	no	no	no	no	no	no	0	0	0	0	0	0	low
56	M	no	no	yes	yes	no	no	no	no	no	no	3.1	no	3.8	no	no	no	no	no	no	no	yes	no	yes	no	no	no	no	no	no	no	no	no	no	0	0	0	0	0	0	low
73	M	no	no	yes	no	no	no	no	no	no	no		no	0	no	no	no	no	no	no	no	yes	no	yes	no	no	no	no	no	no	no	no	no	no	0	0	0	0	0	0	low
72	M	no	no	yes	yes	no	no	no	no	no	no	0.37	no		no	no	no	no	no	no	no	yes	no	yes	no	no	no	no	no	no	no	no	no	no	0	0	0	0	0	0	low
82	M	no	no	yes	no	no	no	no	no	no	no	16.2	no	1.5	yes	no	no	no	no	no	no	yes	no	yes	no	no	no	no	no	no	no	no	no	no	0	0	0	0	0	0	low
88	M	no	no	yes	no	no	no	no	no	no	no	4.67	no	1.5	no	no	no	no	no	no	no	yes	yes	yes	no	no	no	no	no	no	no	no	no	no	0	0	0	0	0	0	low
69	M	no	no	yes	no	no	no	no	no	no	no	1.12	no		no	yes	no	no	no	yes	no	no	no	no	no	no	no	no	no	no	no	no	no	no	0	0	0	0	0	0	low
73	M	no	no	yes	yes	no	no	no	no	no	no	5.9	no	1	no	no	no	no	no	yes	no	yes	no	no	yes	yes	no	no	no	no	no	no	no	no	0	0	0	0	0	0	low
77	M	no	no	yes	no	no	no	no	no	no	no	1.3	no	1.3	no	no	no	no	no	no	no	yes	no	no	yes	no	no	no	no	no	no	no	no	no	0	0	0	0	0	0	low
80	M	no	no	yes	yes	no	no	no	no	no	no	0.5	no	0	no	no	no	no	no	no	no	yes	no	yes	no	no	no	no	no	no	no	no	no	no	0	0	0	0	0	0	low
88	M	no	no	yes	no	no	no	no	no	no	no	2.89	no		no	no	no	no	no	no	no	yes	no	no	no	no	no	no	no	no	no	no	no	no	0	0	0	0	0	0	low
61	M	no	no	yes	no	no	no	no	no	no	no	3.7	no	2.9	no	no	no	no	no	no	no	yes	no	yes	no	no	no	no	no	no	no	no	no	no	0	0	0	0	0	0	low
59	M	no	no	yes	yes	no	no	no	no	no	no	7.4	no	6.3	no	no	no	no	no	no	no	yes	no	yes	no	no	no	no	no	no	no	no	no	no	0	0	0	0	0	0	low
79	M	no	no	no	no	no	no	no	no	no	no	0.9	no		no	no	no	no	no	no	no	no	no	no	no	no	no	no	no	no	no	no	no	no	0	0	0	0	0	0	low
76	M	no	no	no	no	no	no	no	no	no	no	1.4	no	1	no	no	no	no	no	no	no	yes	no	yes	no	no	no	no	no	no	no	no	no	no	0	0	0	0	0	0	low
73	M	no	no	yes	no	no	no	no	no	no	no	6	no	1	no	no	no	no	no	no	no	yes	yes	no	yes	no	no	no	no	no	no	no	no	no	0	0	0	0	0	0	low
90	M	no	no	yes	no	no	no	no	no	no	no	1.45	no	2.2	no	no	no	no	no	no	no	yes	no	yes	no	no	no	no	no	no	no	no	no	no	0	0	0	0	0	0	low
73	M	no	no	yes	no	no	no	no	no	no	no	1.1	no	0	no	no	no	no	no	no	no	yes	no	yes	no	no	no	no	no	no	no	no	no	no	0	0	0	0	0	0	low
59	M	no	no	yes	yes	no	no	no	no	no	no	2.3	no	7.4	no	no	no	no	no	no	no	yes	no	no	yes	no	no	no	no	no	no	no	no	no	0	0	0	0	0	0	low
74	M	no	no	yes	no	no	no	no	no	no	no	2.2	no	1.5	no	no	no	no	no	no	no	yes	yes	no	yes	no	no	no	no	no	no	no	no	no	0	0	0	0	0	0	low
39	M	no	yes	no	no	no	no	no	no	no	no	5.2	no	1.7	no	no	no	no	no	no	no	no	no	no	no	no	no	no	no	no	no	no	no	no	0	0	0	0	0	0	low
63	M	no	no	yes	no	no	no	no	no	no	no	2.8	no	1	yes	no	no	no	no	yes	no	no	no	no	no	no	no	no	no	no	no	no	no	no	0	0	0	0	0	0	low
73	M	no	no	yes	no	no	no	no	no	no	no	1.3	no		no	no	no	no	no	yes	no	yes	yes	yes	no	no	no	no	no	no	no	no	no	no	0	0	0	0	0	0	low
77	M	no	no	yes	no	no	no	no	no	no	no	1.39	no	2	no	no	no	no	no	yes	no	no	no	no	no	no	no	no	no	no	no	no	no	no	0	0	0	0	0	0	low
57	M	no	no	yes	yes	no	no	no	no	no	no	1.3	no	10.2	no	no	no	no	no	yes	no	no	no	no	no	no	no	no	no	no	no	no	no	no	0	0	0	0	0	0	low
68	M	no	no	no	no	no	no	no	no	no	no	22.4	no		no	no	no	no	no	no	no	yes	yes	no	yes	no	no	no	no	no	no	no	no	no	0	0	0	0	0	0	low
67	M	no	no	yes	no	no	no	no	no	no	no	43.4	no	2.9	no	no	no	no	no	no	no	yes	no	no	yes	no	no	no	no	no	no	no	no	no	0	0	0	0	0	0	low
88	M	no	no	yes	no	no	no	no	no	no	no	19.6	no	1.5	no	no	no	no	no	no	no	yes	yes	yes	no	no	no	no	no	no	no	no	no	no	0	0	0	0	0	0	low
79	M	no	no	yes	no	no	no	no	no	no	no	1	no	1.9	no	no	no	no	no	no	no	yes	no	yes	no	no	no	no	no	no	no	no	no	no	0	0	0	0	0	0	low
72	M	no	no	yes	yes	no	no	no	no	no	no	1.7	no	8.3	no	no	no	no	no	no	no	yes	no	no	yes	yes	no	no	no	no	no	no	no	no	0	0	0	0	0	0	low
67	M	no	no	yes	no	no	no	no	no	no	no	3.08	no	1.9	no	yes	no	no	no	no	no	yes	no	no	no	no	no	no	no	no	no	no	no	no	0	0	0	0	0	0	low
57	M	no	no	yes	yes	no	no	no	no	no	no	0.8	no	9.6	no	no	no	no	no	yes	no	no	no	no	no	no	no	no	no	no	no	no	no	no	0	0	0	0	0	0	low
59	M	no	no	yes	yes	no	no	no	no	no	no	3.1	no	7.9	no	no	no	no	no	no	no	yes	no	no	yes	yes	no	no	no	no	no	no	no	no	0	0	0	0	0	0	low
77	M	no	no	yes	no	no	no	no	no	no	no	2	no		yes	yes	no	no	no	yes	no	no	no	no	no	no	no	no	no	no	no	no	no	no	0	0	0	0	0	0	low
82	M	no	no	no	no	no	no	no	no	no	no	26.2	no	1.2	no	no	no	no	no	no	no	yes	no	yes	no	no	no	no	no	no	no	no	no	no	0	0	0	0	0	0	low
68	M	no	no	yes	no	no	no	no	no	no	no	1.3	no	2.3	no	no	no	no	no	no	no	yes	no	yes	no	no	no	no	no	no	no	no	no	no	0	0	0	0	0	0	low
79	M	no	no	yes	yes	no	no	no	no	no	no	1.1	no	2.1	no	no	no	no	no	no	no	yes	no	yes	no	no	no	no	no	no	no	no	no	no	0	0	0	0	0	0	low
86	M	no	no	yes	no	no	no	no	no	no	no	0.79	no	2.6	no	no	no	no	no	no	no	yes	no	yes	no	no	no	no	no	no	no	no	no	no	0	0	0	0	0	0	low
79	M	no	no	yes	yes	no	no	no	no	no	no	0.4	no	0	no	no	no	no	no	no	no	yes	no	yes	no	no	no	no	no	no	no	no	no	no	0	0	0	0	0	0	low
84	M	no	no	no	no	no	no	no	no	no	no	2.9	no	1.2	yes	no	no	no	no	no	no	yes	no	yes	no	no	no	no	no	no	no	no	no	no	0	0	0	0	0	0	low
80	M	no	no	yes	yes	no	no	no	no	no	no	0.8	no	4	yes	no	no	no	no	no	no	yes	no	yes	no	no	no	no	no	no	no	no	no	no	0	0	0	0	0	0	low
73	M	no	no	yes	no	no	no	no	no	no	no	1.2	no		no	no	no	no	no	no	no	yes	no	yes	no	no	no	no	no	no	no	no	no	no	0	0	0	0	0	0	low
91	M	no	no	no	no	no	no	no	no	no	no	2	no	2.1	no	no	no	no	no	no	no	yes	no	no	yes	no	no	no	no	no	no	no	no	no	0	0	0	0	0	0	low
78	M	no	no	yes	no	no	no	no	no	no	no	1	no	1.2	no	no	no	no	no	no	no	yes	no	yes	no	no	no	no	no	no	no	no	no	no	0	0	0	0	0	0	low
63	M	no	no	yes	no	no	no	no	no	no	no	2.1	no		no	no	no	no	no	no	no	yes	no	yes	no	no	no	no	no	no	no	no	no	no	0	0	0	0	0	0	low
91	M	no	no	yes	no	no	no	no	no	no	no	3.62	no	0	no	no	no	no	no	no	no	yes	no	no	no	no	no	no	no	no	no	no	no	no	0	0	0	0	0	0	low
69	M	no	no	yes	no	no	no	no	no	no	no	0.5	no	1.8	no	no	no	no	no	yes	no	no	no	no	no	no	no	no	no	no	no	no	no	no	0	0	0	0	0	0	low
74	M	no	no	yes	no	no	no	no	no	no	no	1.9	no	1	no	no	no	no	no	no	no	yes	no	yes	no	no	no	no	no	no	no	no	no	no	0	0	0	0	0	0	low
64	M	no	no	yes	yes	no	no	no	no	no	no	1	no	8.3	no	no	no	no	no	no	no	yes	no	no	yes	no	no	no	no	no	no	no	no	no	0	0	0	0	0	0	low
63	M	no	no	yes	no	no	no	no	no	no	no	17.4	no	1.9	no	no	no	no	no	no	no	yes	no	no	yes	no	no	no	no	no	no	no	no	no	0	0	0	0	0	0	low
78	M	no	no	yes	no	no	no	no	no	no	no	5.8	no	1	yes	no	no	no	no	no	no	yes	no	yes	no	no	no	no	no	no	no	no	no	no	0	0	0	0	0	0	low
81	M	no	no	yes	no	no	no	no	no	no	no	1.1	no	1.6	no	no	no	no	no	no	no	yes	no	yes	no	no	no	no	no	no	no	no	no	no	0	0	0	0	0	0	low
69	M	no	no	no	no	no	no	no	no	no	no	1.1	no	3.1	yes	no	no	no	no	yes	no	no	no	no	no	no	no	no	no	no	no	no	no	no	0	0	0	0	0	0	low
78	M	no	no	yes	no	no	no	no	no	no	no	8.9	no	5.5	no	no	no	no	no	no	no	yes	no	yes	no	no	no	no	no	no	no	no	no	no	0	0	0	0	0	0	low
84	M	no	no	yes	no	no	no	no	no	no	no	1.6	no	1.5	no	no	no	no	no	no	no	yes	no	yes	no	no	no	no	no	no	no	no	no	no	0	0	0	0	0	0	low
79	M	no	no	yes	no	no	no	no	no	no	no	1.4	no	2.3	no	yes	no	no	no	yes	no	yes	no	no	yes	yes	no	no	no	no	no	no	no	no	0	0	0	0	0	0	low
62	M	no	no	yes	no	no	no	no	no	no	no	0.5	no	1.7	no	no	no	no	no	no	no	no	no	no	no	no	no	no	no	no	no	no	no	no	0	0	0	0	0	0	low
72	M	no	no	yes	yes	no	no	no	no	no	no	5.4	no	11.4	no	no	no	no	no	no	no	yes	no	no	yes	no	no	no	no	no	no	no	no	no	0	0	0	0	0	0	low
72	M	no	no	yes	no	no	no	no	no	no	no	1.78	no		no	yes	no	no	no	yes	no	no	no	no	no	no	no	no	no	no	no	no	no	no	0	0	0	0	0	0	low
79	M	no	no	yes	yes	no	no	no	no	no	no	4.3	no	0	no	no	no	no	no	no	no	yes	no	yes	yes	no	no	no	no	no	no	no	no	no	0	0	0	0	0	0	low
72	M	no	no	yes	no	no	no	no	no	no	no	6.6	no	10.4	no	no	no	no	no	no	no	yes	no	no	no	no	no	no	no	no	no	no	no	no	0	0	0	0	0	0	low
68	M	no	no	yes	no	no	no	no	no	no	no	1.2	no	1.6	yes	no	no	no	no	no	no	yes	no	yes	no	no	no	no	no	no	no	no	no	no	0	0	0	0	0	0	low
75	M	no	no	yes	no	no	no	no	no	no	no	2.1	no	8.1	yes	no	no	no	no	no	no	yes	no	yes	no	no	no	no	no	no	no	no	no	no	0	0	0	0	0	0	low
93	M	no	no	yes	no	no	no	no	no	no	no	1.79	no	0	yes	no	no	no	no	no	no	yes	no	no	no	no	no	no	no	no	no	no	no	no	0	0	0	0	0	0	low
82	M	no	no	no	no	no	no	no	no	no	no	18.1	no	0.5	no	no	no	no	no	no	no	yes	no	yes	no	no	no	no	no	no	no	no	no	no	0	0	0	0	0	0	low
88	M	no	no	yes	no	no	no	no	no	no	no	1.02	no		no	no	no	no	no	no	no	yes	no	yes	no	no	no	no	no	no	no	no	no	no	0	0	0	0	0	0	low
62	M	no	no	yes	no	no	no	no	no	no	no	1.9	no	1.3	yes	no	no	no	no	no	no	yes	no	yes	no	no	no	no	no	no	no	no	no	no	0	0	0	0	0	0	low
72	M	no	no	yes	no	no	no	no	no	no	no		no	0	no	no	no	no	no	no	no	yes	no	yes	no	no	no	no	no	no	no	no	no	no	0	0	0	0	0	0	low
87	M	no	no	yes	no	no	no	no	no	no	no	0.8	no	2	no	no	no	no	no	no	no	yes	no	yes	no	no	no	no	no	no	no	no	no	no	0	0	0	0	0	0	low
78	M	no	no	no	no	no	no	no	no	no	no	1.5	no	4.7	no	no	no	no	no	no	no	yes	no	no	yes	no	no	no	no	no	no	no	no	no	0	0	0	0	0	0	low
22	M	no	no	yes	no	no	no	no	no	no	no	0.7	no	1	no	no	no	no	no	no	no	yes	no	yes	no	no	no	no	no	no	no	no	no	no	0	0	0	0	0	0	low
57	M	no	no	yes	no	no	no	no	no	no	no	0.5	no	1	no	no	no	no	no	no	no	yes	no	yes	no	no	no	no	no	no	no	no	no	no	0	0	0	0	0	0	low
86	M	no	no	yes	no	no	no	no	no	no	no	0.4	no	1.2	no	no	no	no	no	no	no	yes	no	yes	no	no	no	no	no	no	no	no	no	no	0	0	0	0	0	0	low
63	M	no	no	yes	no	no	no	no	no	no	no	11.1	no		yes	no	no	no	no	no	no	yes	no	yes	no	no	no	no	no	no	no	no	no	no	0	0	0	0	0	0	low
83	M	no	no	yes	no	no	no	no	no	no	no	0.4	no	1.2	yes	yes	no	no	no	yes	no	no	no	no	no	no	no	no	no	no	no	no	no	no	0	0	0	0	0	0	low
75	M	no	no	yes	no	no	no	no	no	no	no	2.9	no	7.6	no	no	no	no	no	no	no	yes	no	yes	no	no	no	no	no	no	no	no	no	no	0	0	0	0	0	0	low
91	M	no	no	yes	no	no	no	no	no	no	no	5.38	no	1	no	no	no	no	no	no	no	yes	no	no	yes	yes	no	no	no	no	no	no	no	no	0	0	0	0	0	0	low
51	M	no	no	yes	no	no	no	no	no	no	no	17.1	no		no	no	no	no	no	no	no	yes	yes	no	yes	no	no	no	no	no	no	no	no	no	0	0	0	0	0	0	low
56	M	no	no	yes	yes	no	no	no	no	no	no	7.2	no	3.6	no	no	no	no	no	no	no	yes	no	yes	no	no	no	no	no	no	no	no	no	no	0	0	0	0	0	0	low
81	M	no	no	yes	yes	no	no	no	no	no	no	26.4	no	16.1	no	no	no	no	no	no	no	yes	no	yes	no	no	no	no	no	no	no	no	no	no	0	0	0	0	0	0	low
63	M	no	no	yes	no	no	no	no	no	no	no		no		no	no	no	no	no	yes	no	no	no	no	no	no	no	no	no	no	no	no	no	no	0	0	0	0	0	0	low
82	M	no	no	yes	no	no	no	no	no	no	no	1.6	no	2.3	no	yes	no	no	no	no	no	yes	no	yes	no	no	no	no	no	no	no	no	no	no	0	0	0	0	0	0	low
75	M	no	no	yes	yes	no	no	no	no	no	no	2.9	no	1.9	no	no	no	no	no	no	no	yes	no	no	yes	no	no	no	no	no	no	no	no	no	0	0	0	0	0	0	low
77	M	no	no	yes	no	no	no	no	no	no	no	0.8	no		no	no	no	no	no	no	no	yes	no	yes	no	no	no	no	no	no	no	no	no	no	0	0	0	0	0	0	low
79	M	no	no	yes	no	no	no	no	no	no	no	0.9	no		no	no	no	no	no	no	no	yes	no	yes	no	no	no	no	no	no	no	no	no	no	0	0	0	0	0	0	low
68	M	no	no	yes	no	no	no	no	no	no	no	0.62	no	2.9	yes	no	no	no	no	yes	no	no	no	no	no	no	no	no	no	no	no	no	no	no	0	0	0	0	0	0	low
91	M	no	no	yes	no	no	no	no	no	no	no	1.02	no	1	no	yes	no	no	no	no	no	no	no	yes	yes	yes	no	no	no	no	no	no	no	no	0	0	0	0	0	0	low
76	M	no	no	no	no	no	no	no	no	no	no	1.4	no	1	no	no	no	no	no	no	no	yes	no	yes	no	no	no	no	no	no	no	no	no	no	0	0	0	0	0	0	low
70	M	no	no	yes	no	no	no	no	no	no	no	1.2	no	3	no	no	no	no	no	no	no	yes	no	yes	no	no	no	no	no	no	no	no	no	no	0	0	0	0	0	0	low
68	M	no	no	yes	no	no	no	no	no	no	no	0.5	no		no	no	no	no	no	yes	no	no	no	no	no	no	no	no	no	no	no	no	no	no	0	0	0	0	0	0	low
84	M	no	no	yes	no	no	no	no	no	no	no	1.16	no	3.1	no	no	no	no	no	yes	no	no	no	no	no	no	no	no	no	no	no	no	no	no	0	0	0	0	0	0	low
80	M	no	no	yes	yes	no	no	no	no	no	no	1.3	no	4	yes	no	no	no	no	no	no	yes	no	yes	no	no	no	no	no	no	no	no	no	no	0	0	0	0	0	0	low
88	M	no	no	yes	no	no	no	no	no	no	no	1.1	no	1.5	yes	yes	no	no	no	no	no	yes	no	yes	no	no	no	no	no	no	no	no	no	no	0	0	0	0	0	0	low
76	M	no	no	yes	no	no	no	no	no	no	no	9.55	no	2	no	no	no	no	no	no	no	yes	no	yes	no	no	no	no	no	no	no	no	no	no	0	0	0	0	0	0	low
87	M	no	no	yes	no	no	no	no	no	no	no	17.3	no	2	no	yes	no	no	no	no	no	yes	no	yes	no	no	no	no	no	no	no	no	no	no	0	0	0	0	0	0	low
75	M	no	no	yes	yes	no	no	no	no	no	no	1.37	no	4	no	no	no	no	no	no	no	yes	no	yes	no	no	no	no	no	no	no	no	no	no	0	0	0	0	0	0	low
79	M	no	no	yes	no	no	no	no	no	no	no	1.2	no	1	no	no	no	no	no	no	no	yes	no	yes	no	no	no	no	no	no	no	no	no	no	0	0	0	0	0	0	low
80	M	no	no	yes	yes	no	no	no	no	no	no	0.4	no	0.9	no	no	no	no	no	no	no	yes	no	yes	no	no	no	no	no	no	no	no	no	no	0	0	0	0	0	0	low
91	M	no	no	yes	no	no	no	no	no	no	no	0.58	no		no	no	no	no	no	no	no	yes	no	yes	no	no	no	no	no	no	no	no	no	no	0	0	0	0	0	0	low
87	M	no	no	yes	no	no	no	no	no	no	no	15.53	no	0.5	no	no	no	no	no	no	no	yes	no	yes	no	no	no	no	no	no	no	no	no	no	0	0	0	0	0	0	low
53	M	no	no	yes	no	no	no	no	no	no	no	1.4	no	1.2	no	no	no	no	no	no	no	yes	no	yes	no	no	no	no	no	no	no	no	no	no	0	0	0	0	0	0	low
68	M	no	no	yes	no	no	no	no	no	no	no	0.4	no	1.9	no	no	no	no	no	no	no	yes	no	yes	no	no	no	no	no	no	no	no	no	no	0	0	0	0	0	0	low
76	M	no	no	yes	no	no	no	no	no	no	no	1.94	no	2	no	no	no	no	no	yes	no	yes	no	no	no	no	no	no	no	no	no	no	no	no	0	0	0	0	0	0	low
72	M	no	no	yes	yes	no	no	no	no	no	no	0.4	no	10.8	no	no	no	no	no	no	no	yes	no	no	yes	yes	no	no	no	no	no	no	no	no	0	0	0	0	0	0	low
88	M	no	no	yes	no	no	no	no	no	no	no	14.1	no	2.8	no	no	no	no	no	no	no	yes	no	no	no	no	no	no	no	no	no	no	no	no	0	0	0	0	0	0	low
72	M	no	no	yes	yes	no	no	no	no	no	no	4.29	no	3.7	no	no	no	no	no	no	no	no	no	yes	no	no	no	no	no	no	no	no	no	no	0	0	0	0	0	0	low
80	M	no	no	yes	no	no	no	no	no	no	no	1.6	no	0	yes	yes	no	no	no	yes	no	no	no	no	no	no	no	no	no	no	no	no	no	no	0	0	0	0	0	0	low
77	M	no	no	yes	no	no	no	no	no	no	no	0.7	no	1.6	no	no	no	no	no	no	no	yes	no	yes	no	no	no	no	no	no	no	no	no	no	0	0	0	0	0	0	low
63	M	no	no	yes	no	no	no	no	no	no	no	1.7	no		no	no	no	no	no	no	no	yes	no	yes	no	no	no	no	no	no	no	no	no	no	0	0	0	0	0	0	low
78	M	no	no	yes	yes	no	no	no	no	no	no	0.3	no	8.8	no	no	no	no	no	no	no	yes	no	no	yes	no	no	no	no	no	no	no	no	no	0	0	0	0	0	0	low
72	M	no	no	yes	no	no	no	no	no	no	no	6.6	no		no	no	no	no	no	no	no	yes	no	no	no	no	no	no	no	no	no	no	no	no	0	0	0	0	0	0	low
66	M	no	no	no	no	no	no	no	no	no	no	13.2	no		yes	no	no	no	no	no	no	yes	no	yes	no	no	no	no	no	no	no	no	no	no	0	0	0	0	0	0	low
72	M	no	no	yes	no	no	no	no	no	no	no	3.86	no	1.5	no	no	no	no	no	no	no	yes	no	yes	no	no	no	no	no	no	no	no	no	no	0	0	0	0	0	0	low
73	M	no	no	no	no	no	no	no	no	no	no	0.5	no	2.95	no	no	no	no	no	yes	no	no	no	no	no	no	no	no	no	no	no	no	no	no	0	0	0	0	0	0	low
85	M	no	no	yes	yes	no	no	no	no	no	no	0.49	no	11	no	yes	no	no	no	no	no	yes	no	no	yes	yes	no	no	no	no	no	no	no	no	0	0	0	0	0	0	low
90	M	no	no	no	no	no	no	no	no	no	no	11.8	no	1	no	no	no	no	no	no	no	yes	no	yes	no	no	no	no	no	no	no	no	no	no	0	0	0	0	0	0	low
74	M	no	no	yes	no	no	no	no	no	no	no	1.59	no		no	no	no	no	no	yes	no	no	no	no	no	no	no	no	no	no	no	no	no	no	0	0	0	0	0	0	low
68	M	no	no	yes	yes	no	no	no	no	no	no	4.55	no		no	no	no	no	no	no	no	yes	no	yes	no	no	no	no	no	no	no	no	no	no	0	0	0	0	0	0	low
63	M	no	no	no	no	no	no	no	no	no	no	2.1	no	0	yes	no	no	no	no	no	no	no	no	no	no	no	no	no	no	no	no	no	no	no	0	0	0	0	0	0	low
93	M	no	no	no	no	no	no	no	no	no	no	20.92	no		no	yes	no	no	no	yes	no	yes	no	yes	no	no	no	no	no	no	no	no	no	no	0	0	0	0	0	0	low
65	M	no	no	no	no	no	no	no	no	no	no	3.8	no	1	no	no	no	no	no	no	no	no	no	no	no	no	no	no	no	no	no	no	no	no	0	0	0	0	0	0	low
89	M	no	no	yes	no	no	no	no	no	no	no	12.43	no		yes	no	no	no	no	no	no	yes	no	yes	no	no	no	no	no	no	no	no	no	no	0	0	0	0	0	0	low
40	M	no	no	yes	no	no	no	no	no	no	no	1.74	no	1.8	no	yes	no	no	no	yes	no	no	no	no	no	no	no	no	no	no	no	no	no	no	0	0	0	0	0	0	low
71	M	no	no	no	no	no	no	no	no	no	no	5.9	no	0	no	no	no	no	no	no	no	yes	no	yes	no	no	no	no	no	no	no	no	no	no	0	0	0	0	0	0	low
63	M	no	no	no	no	no	no	no	no	no	no	2.88	no	1	no	no	no	no	no	yes	no	yes	no	yes	no	no	no	no	no	no	no	no	no	no	0	0	0	0	0	0	low
66	M	no	no	no	no	no	no	no	no	no	no	0.6	no	0	no	no	no	no	no	yes	no	no	no	no	no	no	no	no	no	no	no	no	no	no	0	0	0	0	0	0	low
68	M	no	no	yes	yes	no	no	no	no	no	no	5.51	no		no	no	no	no	no	no	no	yes	no	yes	no	no	no	no	no	no	no	no	no	no	0	0	0	0	0	0	low
71	M	no	no	yes	no	no	no	no	no	no	no	6.95	no	1.5	yes	no	no	no	no	no	no	yes	yes	no	no	no	no	no	no	no	no	no	no	no	0	0	0	0	0	0	low
76	M	no	no	no	yes	no	no	no	no	no	no	4.6	no	10	no	no	no	no	no	no	no	yes	no	yes	no	no	no	no	no	no	no	no	no	no	0	0	0	0	0	0	low
88	M	no	yes	no	no	no	no	no	no	no	no	9.1	no		no	no	no	no	no	no	no	no	no	no	no	no	no	no	no	no	no	no	no	no	0	0	0	0	0	0	low
74	M	no	no	no	no	no	no	no	no	no	no	1	no	1.5	no	no	no	no	no	yes	no	no	no	no	no	no	no	no	no	no	no	no	no	no	0	0	0	0	0	0	low
76	M	no	no	yes	no	no	no	no	no	no	no	1.16	no		no	no	no	no	no	no	no	yes	no	yes	no	no	no	no	no	no	no	no	no	no	0	0	0	0	0	0	low
69	M	no	no	yes	no	no	no	no	no	no	no	2.3	no		no	no	no	no	no	no	no	yes	no	yes	no	no	no	no	no	no	no	no	no	no	0	0	0	0	0	0	low
76	M	no	no	no	no	no	no	no	no	no	no	0.5	no	2.36	no	no	no	no	no	no	no	yes	no	yes	no	no	no	no	no	no	no	no	no	no	0	0	0	0	0	0	low
68	M	no	no	yes	yes	no	no	no	no	no	no	4.01	no		no	no	no	no	no	no	no	yes	no	yes	no	no	no	no	no	no	no	no	no	no	0	0	0	0	0	0	low
90	M	no	no	no	no	no	no	no	no	no	no	3	no	1	no	no	no	no	no	no	no	yes	no	yes	no	no	no	no	no	no	no	no	no	no	0	0	0	0	0	0	low
70	M	no	no	no	no	no	no	no	no	no	no	0.7	no		no	no	no	no	no	yes	no	yes	no	yes	no	no	no	no	no	no	no	no	no	no	0	0	0	0	0	0	low
82	M	no	no	yes	no	no	no	no	no	no	no	4.4	no	1.9	no	no	no	no	no	no	no	no	no	no	no	no	no	no	no	no	no	no	no	no	0	0	0	0	0	0	low
67	M	no	no	no	no	no	no	no	no	no	no	2.5	no	2.9	no	no	no	no	no	yes	no	yes	no	yes	no	no	no	no	no	no	no	no	no	no	0	0	0	0	0	0	low
78	M	no	yes	yes	no	no	no	no	no	no	no	4.61	no	2	no	no	no	no	no	no	no	yes	no	yes	no	no	no	no	no	no	no	no	no	no	0	0	0	0	0	0	low
70	M	no	no	no	no	no	no	no	no	no	no	0.8	no		yes	no	no	no	no	no	no	yes	no	yes	no	no	no	no	no	no	no	no	no	no	0	0	0	0	0	0	low
86	M	no	no	yes	no	no	no	no	no	no	no	1.14	no		no	no	no	no	no	yes	no	yes	no	yes	no	no	no	no	no	no	no	no	no	no	0	0	0	0	0	0	low
68	M	yes	no	no	no	no	no	no	no	no	no	0.6	no	2.64	no	yes	no	no	no	yes	no	no	no	no	no	no	no	no	no	no	no	no	no	no	0	0	0	0	0	0	low
92	M	no	no	yes	no	no	no	no	no	no	no	1.69	no	2.4	no	no	no	no	no	no	no	yes	no	yes	no	no	no	no	no	no	no	no	no	no	0	0	0	0	0	0	low
85	M	no	no	yes	no	no	no	no	no	no	no	2.34	no		no	yes	no	no	no	yes	no	no	no	no	no	no	no	no	no	no	no	no	no	no	0	0	0	0	0	0	low
85	M	no	no	yes	no	no	no	no	no	no	no	1.08	no	2.8	no	no	no	no	no	no	no	yes	no	no	no	no	no	no	no	no	no	no	no	no	0	0	0	0	0	0	low
80	M	no	no	yes	no	no	no	no	no	no	no	0.62	no		no	no	no	no	no	yes	no	no	no	no	no	no	no	no	no	no	no	no	no	no	0	0	0	0	0	0	low
87	M	no	no	yes	no	no	no	no	no	no	no	1.4	no	1.4	yes	no	no	no	no	yes	no	no	no	no	no	no	no	no	no	no	no	no	no	no	0	0	0	0	0	0	low
86	M	no	no	yes	no	no	no	no	no	no	no	0.97	no	2	no	no	no	no	no	yes	no	no	no	no	no	no	no	no	no	no	no	no	no	no	0	0	0	0	0	0	low
85	M	no	no	yes	no	no	no	no	no	no	no	0.97	no		no	no	no	no	no	yes	no	no	no	no	no	no	no	no	no	no	no	no	no	no	0	0	0	0	0	0	low
80	M	no	no	no	no	no	no	no	no	no	no	1.4	no	0	yes	no	no	no	no	yes	no	no	no	no	no	no	no	no	no	no	no	no	no	no	0	0	0	0	0	0	low
68	M	no	no	yes	yes	no	no	no	no	no	no	2.31	no		no	no	no	no	no	no	no	yes	no	yes	no	no	no	no	no	no	no	no	no	no	0	0	0	0	0	0	low
80	M	no	no	no	no	no	no	no	no	no	no	1.1	no		no	no	no	no	no	yes	no	no	no	no	no	no	no	no	no	no	no	no	no	no	0	0	0	0	0	0	low
83	M	no	no	yes	no	no	no	no	no	no	no	0.51	no	2.3	no	no	no	no	no	no	no	yes	no	yes	no	no	no	no	no	no	no	no	no	no	0	0	0	0	0	0	low
61	M	no	no	yes	no	no	no	no	no	no	no	1.6	no	1.8	no	no	no	no	no	no	no	yes	no	yes	no	no	no	no	no	no	no	no	no	no	0	0	0	0	0	0	low
83	M	no	no	no	yes	no	no	no	no	no	no	0.6	no		no	no	no	no	no	no	no	yes	no	yes	no	no	no	no	no	no	no	no	no	no	0	0	0	0	0	0	low
81	M	yes	no	no	no	no	no	no	no	no	no	3.7	no		no	no	no	no	no	no	no	yes	no	yes	no	no	no	no	no	no	no	no	no	no	0	0	0	0	0	0	low
79	M	no	no	yes	no	no	no	no	no	no	no	0.96	no		no	yes	no	no	no	yes	no	no	no	no	no	no	no	no	no	no	no	no	no	no	0	0	0	0	0	0	low
85	M	no	no	no	no	no	no	no	no	no	no	1.69	no	1.3	no	no	no	no	no	yes	no	no	no	no	no	no	no	no	no	no	no	no	no	no	0	0	0	0	0	0	low
79	M	no	no	yes	no	no	no	no	no	no	no	5.37	no		no	no	no	no	no	no	no	yes	no	no	yes	yes	no	no	no	no	no	no	no	no	0	0	0	0	0	0	low
73	M	no	yes	yes	no	no	no	no	no	no	no	1.39	no	2.6	no	no	no	no	no	no	no	yes	no	no	yes	yes	no	no	no	no	no	no	no	no	0	0	0	0	0	0	low
70	M	no	no	no	no	no	no	no	no	no	no	14	no	0	no	no	no	no	no	no	no	yes	no	no	yes	yes	no	no	no	no	no	no	no	no	0	0	0	0	0	0	low
92	M	no	no	no	no	no	no	no	no	no	no	5.4	no	3	yes	no	no	no	no	no	no	yes	no	yes	no	no	no	no	no	no	no	no	no	no	0	0	0	0	0	0	low
63	M	no	no	no	no	no	no	no	no	no	no	14.6	no		no	no	no	no	no	yes	no	yes	no	no	no	no	no	no	no	no	no	no	no	no	0	0	0	0	0	0	low
63	M	no	no	yes	no	no	no	no	no	no	no	0.66	no	2.1	no	no	no	no	no	no	no	no	no	no	no	no	no	no	no	no	no	no	no	no	0	0	0	0	0	0	low
80	M	no	no	yes	no	no	no	no	no	no	no	5.9	no	10.2	no	yes	no	no	no	no	no	yes	no	yes	no	no	no	no	no	no	no	no	no	no	0	0	0	0	0	0	low
89	M	no	no	yes	no	no	no	no	no	no	no	1.41	no		yes	no	no	no	no	yes	no	yes	no	yes	no	no	no	no	no	no	no	no	no	no	0	0	0	0	0	0	low
73	M	no	no	no	no	no	no	no	no	no	no	0.8	no		no	no	no	no	no	yes	no	yes	yes	yes	no	no	no	no	no	no	no	no	no	no	0	0	0	0	0	0	low
80	M	no	no	no	no	no	no	no	no	no	no	1.67	no		no	yes	no	no	no	yes	no	no	no	no	no	no	no	no	no	no	no	no	no	no	0	0	0	0	0	0	low
71	M	no	no	yes	no	no	no	no	no	no	no	4.41	no	1.5	yes	no	no	no	no	no	no	yes	yes	no	yes	no	no	no	no	no	no	no	no	no	0	0	0	0	0	0	low
88	M	no	no	no	no	no	no	no	no	no	no	2.18	no		no	yes	no	no	no	yes	no	no	no	no	no	no	no	no	no	no	no	no	no	no	0	0	0	0	0	0	low
71	M	no	no	yes	no	no	no	no	no	no	no	2.73	no		no	no	no	no	no	no	no	yes	yes	yes	no	no	no	no	no	no	no	no	no	no	0	0	0	0	0	0	low
68	M	no	no	yes	yes	no	no	no	no	no	no	3.36	no		no	no	no	no	no	no	no	yes	no	yes	no	no	no	no	no	no	no	no	no	no	0	0	0	0	0	0	low
77	M	no	no	yes	no	no	no	no	no	no	no	2.29	no	1.7	no	yes	no	no	no	no	no	no	no	no	no	no	no	no	no	no	no	no	no	no	0	0	0	0	0	0	low
74	M	no	no	yes	no	no	no	no	no	no	no	1.32	no	1.5	yes	no	no	no	no	no	no	no	no	no	no	no	no	no	no	no	no	no	no	no	0	0	0	0	0	0	low
71	M	no	no	yes	no	no	no	no	no	no	no	0.8	no	3.7	no	no	no	no	no	no	no	yes	yes	yes	no	no	no	no	no	no	no	no	no	no	0	0	0	0	0	0	low
72	M	no	no	no	no	no	no	no	no	no	no	0.8	no	4.3	no	no	no	no	no	no	no	yes	no	yes	no	no	no	no	no	no	no	no	no	no	0	0	0	0	0	0	low
64	M	no	no	no	no	no	no	no	no	no	no	0.5	no	0	no	no	no	no	no	yes	no	no	no	no	no	no	no	no	no	no	no	no	no	no	0	0	0	0	0	0	low
92	M	no	no	yes	no	no	no	no	no	no	no	2.97	no		no	no	no	no	no	no	no	yes	no	yes	no	no	no	no	no	no	no	no	no	no	0	0	0	0	0	0	low
79	M	no	no	no	no	no	no	no	no	no	no	0.6	no	3	no	no	no	no	no	yes	no	no	no	no	no	no	no	no	no	no	no	no	no	no	0	0	0	0	0	0	low
83	M	no	no	no	yes	no	no	no	no	no	no	1.3	no		no	no	no	no	no	no	no	yes	no	yes	no	no	no	no	no	no	no	no	no	no	0	0	0	0	0	0	low
76	M	no	no	yes	no	no	no	no	no	no	no	0.79	no	0	no	no	no	no	no	yes	no	no	no	no	no	no	no	no	no	no	yes	yes	no	no	0	0	0	0	0	0	low
86	M	no	no	no	no	no	no	no	no	no	no	1	no	3.8	no	no	no	no	no	no	no	yes	no	no	yes	no	no	no	no	no	yes	yes	no	no	0	0	0	0	0	0	low
63	M	no	no	no	no	no	no	no	no	no	no	1.4	no	0.8	no	no	no	no	no	yes	no	no	no	no	no	no	no	no	no	no	yes	yes	no	no	0	0	0	0	0	0	low
81	M	no	no	no	no	no	no	no	no	no	no	3.1	no		no	no	no	no	no	no	no	yes	no	no	yes	yes	no	no	no	no	yes	yes	no	no	0	0	0	0	0	0	low
91	M	no	no	no	no	no	no	no	no	no	no	1.5	no	4	no	no	no	no	no	no	no	yes	no	no	yes	no	no	no	no	no	yes	yes	no	no	0	0	0	0	0	0	low
81	M	no	no	yes	yes	no	no	no	no	no	no	1.7	no	1	no	no	no	no	no	no	no	yes	no	no	yes	no	no	no	no	no	no	no	no	no	0	0	0	0	0	0	low
68	M	no	no	yes	yes	no	no	no	no	no	no	4.91	no	5	no	no	no	no	no	no	no	yes	no	no	yes	yes	no	no	no	no	no	no	no	no	0	0	0	0	0	0	low
59	M	no	no	yes	yes	no	no	no	no	no	no	1.1	no	9.7	no	no	no	no	no	no	no	yes	no	no	yes	no	no	no	no	no	no	no	no	no	0	0	0	0	0	0	low
63	M	no	no	no	no	no	no	no	no	no	no	4.99	no		yes	no	no	no	no	no	no	yes	no	yes	no	no	no	no	no	no	no	no	no	no	0	0	0	0	0	0	low
90	M	no	no	yes	no	no	no	no	no	yes	no	0.8	no	5.2	no	no	no	no	no	yes	no	yes	yes	yes	no	no	no	no	no	no	no	no	no	no	0	0	0	0	0	0	low
73	M	no	no	yes	no	no	no	no	no	yes	no	0.4	no	2.8	no	no	no	no	no	no	no	yes	no	yes	no	no	no	no	no	no	no	no	no	no	0	0	0	0	0	0	low
68	M	no	no	yes	no	no	no	no	no	yes	no	1.66	no		no	yes	no	no	no	yes	no	no	no	no	no	no	no	no	no	no	no	no	no	no	0	0	0	0	0	0	low
75	M	no	no	yes	no	no	no	no	no	yes	no	1.03	no	2.5	yes	no	no	no	no	no	no	yes	no	yes	no	no	no	no	no	no	no	no	no	no	0	0	0	0	0	0	low
88	M	no	no	yes	yes	no	no	no	no	no	no	1.9	no	10	no	no	no	no	no	no	no	yes	no	no	yes	yes	no	no	no	no	no	no	no	no	0	0	0	0	0	0	low
88	M	no	no	yes	yes	no	no	no	no	no	no	3.5	no	8	yes	no	no	no	no	no	no	yes	no	yes	no	no	no	no	no	no	no	no	no	no	0	0	0	0	0	0	low
76	M	no	no	yes	no	no	no	no	yes	no	no	0.7	no	1.5	no	no	no	no	no	no	no	no	no	no	no	no	no	no	no	no	no	no	no	no	0	0	0	0	0	0	low
84	M	no	no	no	no	no	no	no	yes	no	no	1.9	no	3.1	no	no	no	no	no	yes	no	no	no	no	no	no	no	no	no	no	no	no	no	no	0	0	0	0	0	0	low
78	M	no	no	no	no	no	no	no	yes	no	no	0.6	no	6.7	no	no	no	no	no	yes	no	no	no	no	no	no	no	no	no	no	no	no	no	no	0	0	0	0	0	0	low
67	M	no	yes	yes	no	no	no	no	yes	no	no	0.61	no	1.4	no	yes	no	no	no	no	no	no	no	no	no	no	no	no	no	no	no	no	no	no	0	0	0	0	0	0	low
66	M	no	no	yes	no	no	no	no	yes	no	no	0.74	no		no	no	no	no	no	yes	no	yes	no	yes	no	no	no	no	no	no	no	no	no	no	0	0	0	0	0	0	low
82	M	no	no	yes	no	no	no	no	no	no	no	0.9	no		no	no	no	no	yes	yes	no	no	no	no	no	no	no	no	no	no	no	no	no	no	0	0	0	0	0	0	low
72	M	no	no	yes	no	no	no	no	no	no	no	1.9	no	1.8	no	no	no	no	yes	yes	no	yes	no	yes	no	no	no	no	no	no	no	no	no	no	0	0	0	0	0	0	low
75	M	no	no	no	no	no	no	no	no	no	no	0.9	no	1.5	yes	no	no	no	yes	yes	no	no	no	no	no	no	no	no	no	no	no	no	no	no	0	0	0	0	0	0	low
81	M	no	no	yes	no	no	no	no	no	no	no	2.1	no		yes	yes	no	no	yes	yes	no	no	no	no	no	no	no	no	no	no	no	no	no	no	0	0	0	0	0	0	low
81	M	no	no	yes	no	no	no	no	no	no	no	4.5	no	2.5	no	yes	no	no	yes	yes	no	no	no	no	no	no	no	no	no	no	no	no	no	no	0	0	0	0	0	0	low
80	M	no	no	no	no	no	no	no	no	no	no	1.1	no	1	no	no	no	no	yes	yes	no	no	no	no	no	no	no	no	no	no	no	no	no	no	0	0	0	0	0	0	low
75	M	no	no	yes	yes	no	no	no	no	no	no	1.2	no	6.6	no	no	no	no	yes	no	no	no	no	no	no	no	no	no	no	no	no	no	no	no	0	0	0	0	0	0	low
75	M	no	no	yes	no	no	no	no	no	no	no	0.6	no	1.6	yes	no	no	no	yes	yes	no	no	no	no	no	no	no	no	no	no	no	no	no	no	0	0	0	0	0	0	low
85	M	no	no	no	no	no	no	no	no	no	no	2.8	yes	1	no	no	no	no	no	no	no	yes	no	yes	no	no	yes	yes	yes	yes	no	no	no	no	0	0	-2	2	0	0	low
55	M	no	no	yes	no	no	no	no	yes	no	no	0.5	yes		no	no	no	no	no	no	no	yes	no	yes	no	no	yes	yes	yes	yes	no	no	no	no	0	0	-2	2	0	0	low
61	M	no	no	yes	no	no	no	no	no	no	no	0.26	yes	18	no	no	no	no	no	no	no	no	no	yes	no	no	no	yes	no	no	no	no	no	no	0	0	-2	2	0	0	low
76	M	no	no	yes	no	no	no	no	no	no	no	0.7	yes	1.7	no	no	no	no	no	no	no	no	no	no	no	no	no	yes	no	no	no	no	no	no	0	0	-2	2	0	0	low
51	M	no	no	yes	no	no	no	no	yes	no	no	0.6	yes	12.3	no	no	no	no	no	no	no	no	no	no	no	no	no	yes	no	no	no	no	no	no	0	0	-2	2	0	0	low
73	M	no	no	yes	no	no	no	no	no	no	no		yes	8.7	no	no	no	no	no	no	no	no	no	no	no	no	no	yes	yes	no	no	no	no	no	0	0	-2	2	0	0	low
51	M	no	no	yes	no	no	no	no	no	no	no	0.5	yes	8.1	no	no	no	no	no	no	no	no	no	no	no	no	no	yes	yes	no	no	no	no	no	0	0	-2	2	0	0	low
54	M	no	no	yes	no	no	no	no	no	no	no		yes	7.3	no	no	no	no	no	no	no	no	no	no	no	no	no	yes	yes	no	no	no	no	no	0	0	-2	2	0	0	low
50	M	no	no	yes	no	no	no	no	no	no	no	0.5	yes		no	no	no	no	no	no	no	no	no	no	no	no	no	yes	yes	no	no	no	no	no	0	0	-2	2	0	0	low
72	M	no	no	no	no	no	no	no	no	no	no	0.6	yes	8.8	no	no	no	no	no	no	no	no	no	no	no	no	no	yes	yes	no	no	no	no	no	0	0	-2	2	0	0	low
71	M	no	no	yes	no	no	no	no	no	no	no	1.14	yes	4.2	no	no	no	no	no	no	no	no	no	no	no	no	no	yes	yes	no	no	no	no	no	0	0	-2	2	0	0	low
59	M	yes	yes	yes	no	no	no	no	no	no	no	0.7	yes		no	no	no	no	no	no	no	yes	no	yes	no	no	no	yes	yes	no	no	no	no	no	0	0	-2	2	0	0	low
59	M	no	no	yes	no	no	no	no	no	no	no	0.75	yes		no	no	no	no	no	no	no	yes	no	yes	no	no	no	yes	yes	no	no	no	no	no	0	0	-2	2	0	0	low
78	M	no	no	yes	no	no	no	no	yes	no	no	0.5	yes	5	yes	no	no	no	no	no	no	no	no	no	no	no	no	yes	yes	no	no	no	no	no	0	0	-2	2	0	0	low
46	M	no	yes	no	no	no	no	no	yes	no	no	0.9	yes	3	no	no	no	no	no	no	no	no	no	no	no	no	no	yes	yes	no	no	no	no	no	0	0	-2	2	0	0	low
74	M	no	no	yes	no	no	no	no	yes	no	no	0.5	yes		no	no	no	no	no	no	no	no	no	no	no	no	no	yes	yes	no	no	no	no	no	0	0	-2	2	0	0	low
74	M	no	no	yes	no	no	no	no	yes	no	no	0.4	yes		no	no	no	no	no	no	no	no	no	no	no	no	no	yes	yes	no	no	no	no	no	0	0	-2	2	0	0	low
57	M	no	no	no	no	no	no	no	yes	no	no	0.45	yes		no	no	no	no	no	no	no	yes	no	yes	no	no	no	yes	yes	no	no	no	no	no	0	0	-2	2	0	0	low
48	M	no	no	yes	no	no	no	no	yes	no	no	0.47	yes	5.6	no	no	no	no	no	no	no	no	no	no	no	no	no	yes	yes	no	no	no	no	no	0	0	-2	2	0	0	low
77	M	no	no	yes	no	no	B-I	yes	no	yes	no	0.4	no	0	no	yes	no	no	yes	yes	no	no	no	no	no	no	no	no	no	no	no	no	no	no	0	0	0	0	0	0	low
71	M	no	no	yes	no	no	B-I	yes	no	no	no	0.94	no		no	no	no	no	no	yes	no	no	no	no	no	no	no	no	no	no	no	no	no	no	0	0	0	0	0	0	low
75	M	no	no	yes	no	no	B-I	yes	no	no	no	3	no		no	no	no	no	no	no	no	yes	no	no	yes	no	no	no	no	no	no	no	no	no	0	0	0	0	0	0	low
82	M	no	no	yes	no	no	B-II	yes	yes	no	no	0.9	no	1.9	no	no	no	no	yes	yes	no	yes	no	yes	no	no	no	no	no	no	no	no	no	no	0	0	0	0	0	0	low
71	M	no	no	yes	no	no	B-II	yes	no	no	no	1	no	1.9	no	no	no	no	no	no	no	yes	yes	no	yes	no	no	no	no	no	no	no	no	no	0	0	0	0	0	0	low
79	M	no	no	yes	no	no	B-II	yes	no	no	no	0.9	no	3.2	no	yes	no	no	yes	yes	no	no	no	no	no	no	no	no	no	no	no	no	no	no	0	0	0	0	0	0	low
86	M	no	no	yes	no	no	B-II	yes	no	no	no	1.2	no	3.1	no	no	no	no	no	no	no	yes	no	no	yes	no	no	no	yes	yes	yes	yes	no	no	0	0	0	0	0	0	low
90	M	no	no	yes	no	no	B-II	yes	no	no	no	1.01	no	1.3	no	no	no	no	no	yes	no	yes	no	yes	no	no	no	no	no	no	no	no	no	no	0	0	0	0	0	0	low
90	M	no	no	yes	no	no	B-II	yes	no	no	no	0.86	no	1.3	no	no	no	no	no	yes	no	yes	no	yes	no	no	no	no	no	no	no	no	no	no	0	0	0	0	0	0	low
86	M	no	no	yes	no	no	B-II	yes	no	no	no	4.7	no	0	no	no	no	no	no	no	no	yes	no	no	no	no	no	no	no	no	no	no	no	no	0	0	0	0	0	0	low
58	M	no	no	yes	no	no	B-II	yes	no	no	no	5.06	no	5.4	no	no	no	no	no	no	no	yes	no	yes	no	no	no	no	no	no	no	no	no	no	0	0	0	0	0	0	low
58	M	no	no	yes	no	no	B-II	yes	no	no	no	6.01	no	6.7	no	no	no	no	no	no	no	yes	no	yes	no	no	no	no	no	no	no	no	no	no	0	0	0	0	0	0	low
87	M	no	no	yes	no	no	B-II	yes	no	no	no	2.5	no	2.5	no	no	no	no	no	no	no	yes	no	yes	no	no	no	no	no	no	no	no	no	no	0	0	0	0	0	0	low
86	M	no	no	yes	no	no	B-II	yes	no	no	no	3.5	no		no	no	no	no	no	yes	no	yes	no	yes	no	no	no	no	no	no	no	no	no	no	0	0	0	0	0	0	low
86	M	no	no	yes	no	no	B-II	yes	no	no	no	1.7	no		no	no	no	no	no	yes	no	no	no	no	no	no	no	no	no	no	no	no	no	no	0	0	0	0	0	0	low
79	M	no	no	no	no	no	B-II	yes	no	no	no	0.8	yes	1.9	no	no	yes	no	yes	yes	no	yes	no	yes	no	no	yes	yes	yes	yes	yes	no	yes	no	0	0	-2	2	0	0	low
85	M	no	no	no	no	no	B-II	yes	no	no	no	2	no	0.5	no	no	no	no	yes	yes	no	no	no	no	no	no	no	no	no	no	no	no	no	no	0	0	0	0	0	0	low
89	M	no	no	yes	no	no	R-Y	yes	no	no	no	1.6	no	1.5	no	no	no	no	yes	yes	no	no	no	no	no	no	no	no	no	no	yes	yes	no	no	0	0	0	0	0	0	low
83	M	no	no	yes	no	no	R-Y	yes	no	no	no	6.7	no	5	no	yes	no	no	yes	yes	no	no	no	no	no	no	no	no	no	no	no	no	no	no	0	0	0	0	0	0	low
71	M	no	no	no	no	no	R-Y	yes	no	no	no	1	no	1.4	no	no	no	no	no	yes	no	no	no	no	no	no	no	no	no	no	no	no	no	no	0	0	0	0	0	0	low
82	M	no	no	no	no	no	R-Y	yes	no	no	no	1.1	no	1.4	no	yes	no	no	no	yes	no	no	no	no	no	no	no	no	no	no	no	no	no	no	0	0	0	0	0	0	low
88	M	no	no	yes	no	no	no	no	no	no	no	2.91	no		no	yes	no	yes	no	no	no	yes	no	yes	no	no	no	no	no	no	no	no	no	no	0	0	0	0	0	0	low
76	M	no	yes	no	no	no	no	no	no	no	no	1	no	2.2	yes	no	no	yes	no	yes	no	no	no	no	no	no	no	no	no	no	no	no	no	no	0	0	0	0	0	0	low
80	M	no	no	no	no	no	no	no	no	no	no	1	no	1.9	no	no	no	yes	no	yes	no	no	no	no	no	no	no	no	no	no	no	no	no	no	0	0	0	0	0	0	low
91	M	no	no	yes	no	no	no	no	no	no	no		no		no	no	no	yes	no	no	no	yes	no	yes	no	no	no	no	no	no	no	no	no	no	0	0	0	0	0	0	low
87	M	no	no	yes	no	no	B-I	yes	no	no	no	2.18	no		no	no	no	yes	no	yes	no	no	no	no	no	no	no	no	no	no	no	no	no	no	0	0	0	0	0	0	low
91	M	no	no	no	no	no	B-II	yes	no	no	no	2.8	no	0	no	no	no	yes	no	yes	no	yes	no	yes	no	no	no	no	no	no	no	no	no	no	0	0	0	0	0	0	low
89	M	no	no	yes	no	no	B-II	yes	no	no	no	1.74	no		no	no	no	yes	no	no	no	yes	no	yes	no	no	no	no	no	no	no	no	no	no	0	0	0	0	0	0	low
84	M	no	no	no	no	no	no	no	no	no	yes	1.1	yes	2.3	no	yes	yes	no	no	no	no	yes	no	yes	no	no	no	no	no	no	no	no	no	no	0	2	-2	0	0	0	low
58	M	no	no	yes	yes	no	no	no	no	no	yes	1.2	yes	10.8	no	yes	no	no	no	no	no	yes	no	no	yes	no	no	no	no	no	no	no	no	no	0	2	-2	0	0	0	low
57	M	no	no	yes	yes	no	no	no	no	no	yes	10.8	yes	10	no	yes	no	no	no	no	no	yes	no	yes	no	no	no	no	no	no	no	no	no	no	0	2	-2	0	0	0	low
76	M	no	no	no	no	no	no	no	no	no	yes	1.1	yes	0	no	yes	no	no	no	yes	no	no	no	no	no	no	no	no	no	no	no	no	no	no	0	2	-2	0	0	0	low
60	M	no	no	yes	no	no	no	no	no	no	yes	4.3	yes	2.4	no	yes	no	no	no	no	no	yes	no	yes	no	no	no	no	no	no	no	no	no	no	0	2	-2	0	0	0	low
71	M	no	no	yes	no	no	R-Y	yes	no	no	yes	3.5	yes	1.2	no	yes	no	no	yes	yes	no	no	no	no	no	no	no	no	no	no	no	no	no	no	0	2	-2	0	0	0	low
70	M	no	no	yes	no	no	no	no	no	no	no	0.55	no		no	no	no	no	no	no	no	no	no	no	no	no	no	no	no	no	no	no	no	no	0	0	0	0	0	0	low
71	F	no	no	yes	no	no	no	no	no	no	no	1	no	1	no	no	no	no	no	yes	no	yes	no	yes	no	no	no	no	no	no	no	no	no	no	1	0	0	0	0	1	moderate
73	F	no	no	yes	no	no	no	no	no	no	no	0.41	no	3.4	no	yes	no	no	no	yes	no	no	no	no	no	no	no	no	no	no	no	no	no	no	1	0	0	0	0	1	moderate
69	F	no	no	yes	no	no	no	no	no	no	no	1.57	no	1	no	no	no	no	no	no	no	yes	no	no	no	no	no	no	no	no	no	no	no	no	1	0	0	0	0	1	moderate
73	F	no	no	yes	no	no	no	no	no	no	no	12.9	no		no	no	no	no	no	no	no	yes	no	yes	no	no	no	no	no	no	no	no	no	no	1	0	0	0	0	1	moderate
79	F	no	no	yes	no	no	no	no	no	no	no	4	no		no	no	no	no	no	no	no	yes	no	no	yes	no	no	no	no	no	no	no	no	no	1	0	0	0	0	1	moderate
61	F	no	no	no	no	no	no	no	no	no	no	0.9	no		no	yes	no	no	no	no	no	yes	no	yes	no	no	no	no	no	no	no	no	no	no	1	0	0	0	0	1	moderate
93	F	no	no	no	no	no	no	no	no	no	no	0.7	no	7.2	no	no	no	no	no	no	no	yes	no	yes	no	no	no	no	no	no	no	no	no	no	1	0	0	0	0	1	moderate
88	F	no	no	no	no	no	no	no	no	no	no	4.23	no	2.1	no	no	no	no	no	no	no	yes	yes	no	yes	no	no	no	no	no	no	no	no	no	1	0	0	0	0	1	moderate
69	F	no	no	yes	yes	no	no	no	no	no	no	0.48	no		no	no	no	no	no	no	no	yes	no	no	no	no	no	no	no	no	no	no	no	no	1	0	0	0	0	1	moderate
89	F	no	no	yes	yes	no	no	no	no	no	no	10.38	no	6	yes	no	no	no	no	no	no	yes	no	no	no	no	no	no	no	no	no	no	no	no	1	0	0	0	0	1	moderate
60	F	no	no	yes	no	no	no	no	no	no	no	1.6	no	1.1	no	no	no	no	no	no	no	yes	no	yes	no	no	no	no	no	no	no	no	no	no	1	0	0	0	0	1	moderate
64	F	no	no	yes	yes	no	no	no	no	no	no	1.1	no		yes	no	no	no	no	no	no	yes	no	yes	no	no	no	no	no	no	no	no	no	no	1	0	0	0	0	1	moderate
73	F	no	no	no	yes	no	no	no	no	no	no	3.94	no	15.6	yes	no	no	no	no	no	no	yes	no	yes	no	no	no	no	no	no	no	no	no	no	1	0	0	0	0	1	moderate
91	F	no	no	yes	no	no	no	no	no	no	no	4.7	no		no	no	no	no	no	no	no	yes	yes	no	yes	no	no	no	no	no	no	no	no	no	1	0	0	0	0	1	moderate
83	F	no	no	yes	no	no	no	no	no	no	no	0.7	no	3.7	yes	no	no	no	no	yes	no	yes	no	yes	no	no	no	no	no	no	no	no	no	no	1	0	0	0	0	1	moderate
91	F	no	no	yes	no	no	no	no	no	no	no	2.7	no	1.5	no	no	no	no	no	yes	no	no	no	no	no	no	no	no	no	no	no	no	no	no	1	0	0	0	0	1	moderate
67	F	no	no	yes	yes	no	no	no	no	no	no	6.4	no	12.6	no	no	no	no	no	no	no	yes	yes	no	yes	no	no	no	no	no	no	no	no	no	1	0	0	0	0	1	moderate
69	F	no	no	yes	yes	no	no	no	no	no	no	2.3	no	4	no	no	no	no	no	no	no	yes	yes	no	yes	no	no	no	no	no	no	no	no	no	1	0	0	0	0	1	moderate
89	F	no	no	yes	no	no	no	no	no	no	no	4.33	no	6	yes	no	no	no	no	no	no	no	no	no	no	no	no	no	no	no	no	no	no	no	1	0	0	0	0	1	moderate
69	F	no	no	yes	yes	no	no	no	no	no	no	3.6	no	8.5	no	no	no	no	no	no	no	yes	no	no	no	no	no	no	no	no	no	no	no	no	1	0	0	0	0	1	moderate
66	F	no	no	yes	yes	no	no	no	no	no	no	3.9	no	9.7	no	no	no	no	no	yes	no	no	no	no	no	no	no	no	no	no	no	no	no	no	1	0	0	0	0	1	moderate
96	F	no	no	no	yes	no	no	no	no	no	no	1.4	no	10	no	yes	no	no	no	no	no	yes	no	no	yes	yes	no	no	no	no	no	no	no	no	1	0	0	0	0	1	moderate
71	F	no	no	yes	no	no	no	no	no	no	no	0.4	no	3.3	yes	yes	no	no	no	yes	no	no	no	no	no	no	no	no	no	no	no	no	no	no	1	0	0	0	0	1	moderate
70	F	no	no	yes	no	no	no	no	no	no	no	1.1	no	0.8	no	no	no	no	no	no	no	yes	no	yes	no	no	no	no	no	no	no	no	no	no	1	0	0	0	0	1	moderate
87	F	no	no	yes	yes	no	no	no	no	no	no	2.8	no	3.1	no	no	no	no	no	no	no	yes	no	no	yes	yes	no	no	no	no	no	no	no	no	1	0	0	0	0	1	moderate
66	F	no	no	yes	yes	no	no	no	no	no	no	3.5	no	10.1	no	no	no	no	no	yes	no	yes	no	no	yes	yes	no	no	no	no	no	no	no	no	1	0	0	0	0	1	moderate
71	F	no	no	yes	no	no	no	no	no	no	no	9.4	no	1.8	no	no	no	no	no	no	no	yes	yes	no	yes	no	no	no	no	no	no	no	no	no	1	0	0	0	0	1	moderate
70	F	no	no	yes	yes	no	no	no	no	no	no	3	no	9.6	no	no	no	no	no	no	no	yes	no	no	yes	no	no	no	no	no	no	no	no	no	1	0	0	0	0	1	moderate
67	F	no	no	no	no	no	no	no	no	no	no	0.4	no		no	no	no	no	no	no	no	no	no	no	no	no	no	no	no	no	no	no	no	no	1	0	0	0	0	1	moderate
90	F	no	no	no	yes	no	no	no	no	no	no	7.1	no	10.7	no	no	no	no	no	no	no	yes	no	no	yes	no	no	no	no	no	no	no	no	no	1	0	0	0	0	1	moderate
66	F	no	no	yes	no	no	no	no	no	no	no	1.2	no	2.4	no	no	no	no	no	no	no	yes	no	yes	no	no	no	no	no	no	no	no	no	no	1	0	0	0	0	1	moderate
66	F	no	no	yes	no	no	no	no	no	no	no	0.7	no	1.6	no	no	no	no	no	no	no	yes	no	yes	no	no	no	no	no	no	no	no	no	no	1	0	0	0	0	1	moderate
60	F	no	no	no	no	no	no	no	no	no	no	0.9	no		no	no	no	no	no	no	no	yes	yes	yes	no	no	no	no	no	no	no	no	no	no	1	0	0	0	0	1	moderate
62	F	no	no	no	yes	no	no	no	no	no	no	0.69	no	5.5	yes	no	no	no	no	no	no	yes	no	no	yes	no	no	no	no	no	no	no	no	no	1	0	0	0	0	1	moderate
65	F	no	no	yes	yes	no	no	no	no	no	no	2.72	no	3	no	no	no	no	no	no	no	yes	no	yes	no	no	no	no	no	no	no	no	no	no	1	0	0	0	0	1	moderate
61	F	no	no	no	no	no	no	no	no	no	no	0.9	no		no	no	no	no	no	no	no	yes	yes	yes	no	no	no	no	no	no	no	no	no	no	1	0	0	0	0	1	moderate
75	F	no	no	no	no	no	no	no	no	no	no	7.3	no	3	no	no	no	no	no	no	no	yes	yes	yes	no	no	no	no	no	no	no	no	no	no	1	0	0	0	0	1	moderate
95	F	no	no	yes	no	no	no	no	no	no	no	1	no	1.6	no	no	no	no	no	yes	no	yes	no	yes	no	no	no	no	no	no	no	no	no	no	1	0	0	0	0	1	moderate
82	F	no	no	yes	yes	no	no	no	no	no	no	2.3	no	6.5	no	no	no	no	no	no	no	yes	no	yes	no	no	no	no	no	no	no	no	no	no	1	0	0	0	0	1	moderate
56	F	no	no	yes	no	no	no	no	no	no	no	0.3	no	3.4	no	no	no	no	no	no	no	yes	no	no	no	no	no	no	no	no	no	no	no	no	1	0	0	0	0	1	moderate
73	F	no	no	no	no	no	no	no	no	no	no	0.8	no	0.5	no	no	no	no	no	no	no	yes	no	yes	no	no	no	no	no	no	no	no	no	no	1	0	0	0	0	1	moderate
79	F	no	no	yes	no	no	no	no	no	no	no	5.2	no	1.6	no	yes	no	no	no	no	no	yes	no	no	yes	yes	no	no	no	no	no	no	no	no	1	0	0	0	0	1	moderate
72	F	no	no	no	no	no	no	no	no	no	no	1	no	2.3	no	no	no	no	no	no	no	yes	yes	yes	no	no	no	no	no	no	no	no	no	no	1	0	0	0	0	1	moderate
69	F	no	no	yes	no	no	no	no	no	no	no		no	0.8	no	no	no	no	no	yes	no	yes	no	yes	no	no	no	no	no	no	no	no	no	no	1	0	0	0	0	1	moderate
78	F	no	no	yes	no	no	no	no	no	no	no	0.9	no	1.6	no	no	no	no	no	no	no	yes	no	yes	no	no	no	no	no	no	no	no	no	no	1	0	0	0	0	1	moderate
81	F	no	no	no	yes	no	no	no	no	no	no	2	no	5.4	no	no	no	no	no	no	no	yes	no	no	yes	yes	no	no	no	no	no	no	no	no	1	0	0	0	0	1	moderate
54	F	no	no	yes	no	no	no	no	no	no	no	0.6	no	0	no	no	no	no	no	no	no	no	no	no	no	no	no	no	no	no	no	no	no	no	1	0	0	0	0	1	moderate
67	F	no	no	yes	no	no	no	no	no	no	no	0.4	no	2.9	no	no	no	no	no	yes	no	yes	no	no	yes	no	no	no	no	no	no	no	no	no	1	0	0	0	0	1	moderate
67	F	no	no	no	no	no	no	no	no	no	no	0.9	no	1.35	no	no	no	no	no	no	no	no	no	no	no	no	no	no	no	no	no	no	no	no	1	0	0	0	0	1	moderate
61	F	no	no	no	no	no	no	no	no	no	no	1	no	1.9	no	no	no	no	no	no	no	yes	no	yes	no	no	no	no	no	no	no	no	no	no	1	0	0	0	0	1	moderate
78	F	no	no	no	no	no	no	no	no	no	no	0.6	no	1.8	no	no	no	no	no	no	no	yes	no	yes	no	no	no	no	no	no	no	no	no	no	1	0	0	0	0	1	moderate
55	F	no	no	yes	yes	no	no	no	no	no	no	0.4	no		no	no	no	no	no	no	no	yes	no	no	yes	no	no	no	no	no	no	no	no	no	1	0	0	0	0	1	moderate
81	F	no	no	yes	no	no	no	no	no	no	no	27.2	no		no	yes	no	no	no	no	no	yes	no	yes	no	no	no	no	no	no	no	no	no	no	1	0	0	0	0	1	moderate
82	F	no	no	yes	no	no	no	no	no	no	no	6.8	no	4.1	no	no	no	no	no	no	no	yes	yes	no	yes	no	no	no	no	no	no	no	no	no	1	0	0	0	0	1	moderate
74	F	no	no	yes	no	no	no	no	no	no	no	1.3	no	1.9	no	no	no	no	no	no	no	no	no	no	no	no	no	no	no	no	no	no	no	no	1	0	0	0	0	1	moderate
71	F	no	no	yes	yes	no	no	no	no	no	no	0.9	no	4.7	no	no	no	no	no	no	no	yes	no	yes	no	no	no	no	no	no	no	no	no	no	1	0	0	0	0	1	moderate
83	F	no	no	yes	no	no	no	no	no	no	no	0.7	no	3.7	yes	no	no	no	no	yes	no	no	no	no	no	no	no	no	no	no	no	no	no	no	1	0	0	0	0	1	moderate
73	F	no	no	no	yes	no	no	no	no	no	no	3.1	no	6.5	no	no	no	no	no	no	no	yes	no	yes	no	no	no	no	no	no	no	no	no	no	1	0	0	0	0	1	moderate
95	F	no	no	no	no	no	no	no	no	no	no	2.7	no	1.5	no	yes	no	no	no	yes	no	no	no	no	no	no	no	no	no	no	no	no	no	no	1	0	0	0	0	1	moderate
78	F	no	no	no	yes	no	no	no	no	no	no	3.9	no	6	no	no	no	no	no	no	no	yes	no	no	yes	yes	no	no	no	no	no	no	no	no	1	0	0	0	0	1	moderate
69	F	no	no	yes	no	no	no	no	no	no	no	1.61	no		yes	no	no	no	no	no	no	yes	yes	yes	no	no	no	no	no	no	no	no	no	no	1	0	0	0	0	1	moderate
74	F	no	no	no	yes	no	no	no	no	no	no	0.6	no	7	no	no	no	no	no	no	no	yes	no	no	yes	no	no	no	no	no	no	no	no	no	1	0	0	0	0	1	moderate
92	F	no	no	yes	no	no	no	no	no	no	no	1.13	no		yes	yes	no	no	no	yes	no	no	no	no	no	no	no	no	no	no	no	no	no	no	1	0	0	0	0	1	moderate
83	F	no	no	no	no	no	no	no	no	no	no	0.92	no	3.3	no	no	no	no	no	no	no	yes	yes	yes	no	no	no	no	no	no	no	no	no	no	1	0	0	0	0	1	moderate
95	F	no	no	yes	no	no	no	no	no	no	no	1.1	no	2.5	no	no	no	no	no	no	no	yes	no	yes	no	no	no	no	no	no	no	no	no	no	1	0	0	0	0	1	moderate
88	F	no	no	yes	no	no	no	no	no	no	no	1.2	no	1.2	yes	no	no	no	no	yes	no	no	no	no	no	no	no	no	no	no	no	no	no	no	1	0	0	0	0	1	moderate
76	F	no	no	yes	no	no	no	no	no	no	no	0.53	no	2.5	yes	no	no	no	no	no	no	no	no	no	no	no	no	no	no	no	no	no	no	no	1	0	0	0	0	1	moderate
88	F	no	no	no	no	no	no	no	no	no	no	19	no	1.5	no	no	no	no	no	no	no	yes	yes	no	yes	no	no	no	no	no	no	no	no	no	1	0	0	0	0	1	moderate
82	F	no	no	yes	no	no	no	no	no	no	no	0.88	no	3.3	no	no	no	no	no	no	no	yes	yes	yes	no	no	no	no	no	no	no	no	no	no	1	0	0	0	0	1	moderate
84	F	yes	no	no	yes	no	no	no	no	no	no	1.8	no		no	no	no	no	no	no	no	no	no	no	no	no	no	no	no	no	no	no	no	no	1	0	0	0	0	1	moderate
90	F	no	no	no	yes	no	no	no	no	no	no	20	no	1	no	no	no	no	no	no	no	yes	no	yes	no	no	no	no	no	no	no	no	no	no	1	0	0	0	0	1	moderate
84	F	no	no	yes	yes	no	no	no	no	no	no	3.25	no	4.8	no	no	no	no	no	no	no	yes	no	yes	no	no	no	no	no	no	no	no	no	no	1	0	0	0	0	1	moderate
95	F	no	no	yes	no	no	no	no	no	no	no	0.72	no	2	yes	no	no	no	no	yes	no	no	no	no	no	no	no	no	no	no	no	no	no	no	1	0	0	0	0	1	moderate
79	F	no	no	no	no	no	no	no	no	no	no	0.9	no	1.9	no	no	no	no	no	yes	no	no	no	no	no	no	no	no	no	no	no	no	no	no	1	0	0	0	0	1	moderate
84	F	no	no	yes	no	no	no	no	no	no	no	2.52	no	2.4	yes	no	no	no	no	no	no	yes	no	yes	no	no	no	no	no	no	no	no	no	no	1	0	0	0	0	1	moderate
82	F	no	no	no	no	no	no	no	no	no	no	17.4	no		no	no	no	no	no	no	no	yes	no	no	yes	no	no	no	no	no	no	no	no	no	1	0	0	0	0	1	moderate
69	F	no	no	yes	no	no	no	no	no	no	no	0.96	no		yes	no	no	no	no	no	no	yes	yes	yes	no	no	no	no	no	no	no	no	no	no	1	0	0	0	0	1	moderate
67	F	no	no	yes	no	no	no	no	no	no	no	0.7	no	2.4	no	no	no	no	no	yes	no	yes	no	yes	no	no	no	no	no	no	no	no	no	no	1	0	0	0	0	1	moderate
85	F	no	no	no	no	no	no	no	no	no	no	2.6	no	1	yes	no	no	no	no	no	no	no	no	no	no	no	no	no	no	no	no	no	no	no	1	0	0	0	0	1	moderate
51	F	no	no	no	no	no	no	no	no	no	no	1.51	no	0.8	no	no	no	no	no	no	no	no	no	no	no	no	no	no	no	no	no	no	no	no	1	0	0	0	0	1	moderate
84	F	no	no	yes	no	no	no	no	no	no	no	1.65	no	2.6	yes	no	no	no	no	yes	no	no	no	no	no	no	no	no	no	no	no	no	no	no	1	0	0	0	0	1	moderate
93	F	no	no	yes	no	no	no	no	no	no	no	8.44	no	1.5	no	no	no	no	no	no	no	yes	no	yes	no	no	no	no	no	no	no	no	no	no	1	0	0	0	0	1	moderate
83	F	no	no	no	yes	no	no	no	no	no	no	1.91	no	12.3	no	no	no	no	no	no	no	yes	no	no	yes	yes	no	no	no	no	no	no	no	no	1	0	0	0	0	1	moderate
46	F	no	no	yes	no	no	no	no	no	no	no	0.89	no		no	no	no	no	no	yes	no	no	no	no	no	no	no	no	no	no	no	no	no	no	1	0	0	0	0	1	moderate
70	F	no	no	no	no	no	no	no	no	no	no	4.1	no	0	yes	no	no	no	no	no	no	yes	no	yes	no	no	no	no	no	no	no	no	no	no	1	0	0	0	0	1	moderate
83	F	no	no	no	no	no	no	no	no	no	no	0.4	no	1	yes	no	no	no	no	yes	no	yes	no	yes	no	no	no	no	no	no	no	no	no	no	1	0	0	0	0	1	moderate
93	F	no	no	yes	no	no	no	no	no	no	no	7.55	no	3.5	no	yes	no	no	no	no	no	yes	no	no	yes	yes	no	no	no	no	no	no	no	no	1	0	0	0	0	1	moderate
85	F	no	no	yes	no	no	no	no	no	no	no	0.89	no		no	no	no	no	no	no	no	yes	no	no	no	no	no	no	no	no	no	no	no	no	1	0	0	0	0	1	moderate
90	F	no	no	no	no	no	no	no	no	no	no	6.5	no		no	no	no	no	no	no	no	yes	no	no	yes	no	no	no	no	no	no	no	no	no	1	0	0	0	0	1	moderate
54	F	no	no	yes	no	no	no	no	no	no	no	0.5	no		no	no	no	no	no	no	no	yes	no	yes	no	no	no	no	no	no	no	no	no	no	1	0	0	0	0	1	moderate
59	F	no	no	no	yes	no	no	no	no	no	no	2.1	no	1	no	no	no	no	no	no	no	yes	no	yes	no	no	no	no	no	no	no	no	no	no	1	0	0	0	0	1	moderate
87	F	no	no	yes	no	no	no	no	no	no	no	1.63	no	2.7	no	no	no	no	no	no	no	yes	no	yes	no	no	no	no	no	no	no	no	no	no	1	0	0	0	0	1	moderate
86	F	no	no	no	no	no	no	no	no	no	no	0.8	no		no	no	no	no	no	no	no	yes	no	yes	no	no	no	no	no	no	no	no	no	no	1	0	0	0	0	1	moderate
51	F	no	no	no	no	no	no	no	no	no	no	1.17	no	0.8	no	no	no	no	no	no	no	yes	no	no	yes	no	no	no	no	no	no	no	no	no	1	0	0	0	0	1	moderate
89	F	no	no	no	no	no	no	no	no	no	no	9.2	no	1	no	no	no	no	no	no	no	yes	no	no	yes	no	no	no	no	no	no	no	no	no	1	0	0	0	0	1	moderate
73	F	no	no	no	no	no	no	no	no	no	no	1.11	no		no	yes	no	no	no	yes	no	no	no	no	no	no	no	no	no	no	no	no	no	no	1	0	0	0	0	1	moderate
92	F	no	no	no	no	no	no	no	no	no	no	5.8	no		no	no	no	no	no	no	no	yes	yes	no	yes	no	no	no	no	no	no	no	no	no	1	0	0	0	0	1	moderate
90	F	no	no	no	no	no	no	no	no	no	no	1.1	no	0	no	no	no	no	no	no	no	yes	no	yes	no	no	no	no	no	no	no	no	no	no	1	0	0	0	0	1	moderate
69	F	no	no	yes	no	no	no	no	no	no	no	1.11	no		yes	no	no	no	no	no	no	yes	yes	yes	no	no	no	no	no	no	no	no	no	no	1	0	0	0	0	1	moderate
89	F	no	no	no	no	no	no	no	no	no	no	15.6	no	1	no	no	no	no	no	no	no	yes	no	yes	no	no	no	no	no	no	no	no	no	no	1	0	0	0	0	1	moderate
70	F	no	no	yes	no	no	no	no	no	no	no	2.58	no	2	yes	no	no	no	no	yes	no	no	no	no	no	no	no	no	no	no	no	no	no	no	1	0	0	0	0	1	moderate
88	F	no	no	no	yes	no	no	no	no	no	no	0.6	no	7.5	no	no	no	no	no	no	no	yes	no	yes	no	no	no	no	no	no	no	no	no	no	1	0	0	0	0	1	moderate
94	F	no	yes	yes	no	no	no	no	no	no	no	0.5	no	0.8	yes	no	no	no	no	no	no	yes	no	yes	no	no	no	no	no	no	no	no	no	no	1	0	0	0	0	1	moderate
87	F	no	no	yes	no	no	no	no	no	no	no	0.73	no	2.3	no	yes	no	no	no	no	no	yes	no	yes	no	no	no	no	no	no	no	no	no	no	1	0	0	0	0	1	moderate
84	F	no	no	no	no	no	no	no	no	no	no	0.68	no	3	yes	no	no	no	no	yes	no	no	no	no	no	no	no	no	no	no	no	no	no	no	1	0	0	0	0	1	moderate
76	F	no	no	yes	no	no	no	no	no	no	no	0.6	no	1.4	no	no	no	no	no	no	no	yes	no	yes	no	no	no	no	no	no	no	no	no	no	1	0	0	0	0	1	moderate
83	F	no	no	yes	yes	no	no	no	no	no	no	8.13	no	4.3	no	no	no	no	no	no	no	yes	no	yes	no	no	no	no	no	no	no	no	no	no	1	0	0	0	0	1	moderate
94	F	no	no	yes	no	no	no	no	no	no	no	0.72	no	1.3	yes	no	no	no	no	no	no	yes	no	yes	no	no	no	no	no	no	no	no	no	no	1	0	0	0	0	1	moderate
87	F	no	no	yes	no	no	no	no	no	no	no	3.52	no	2.5	no	no	no	no	no	no	no	yes	no	yes	no	no	no	no	no	no	no	no	no	no	1	0	0	0	0	1	moderate
83	F	no	no	yes	yes	no	no	no	no	no	no	1.97	no		no	no	no	no	no	no	no	yes	no	yes	no	no	no	no	no	no	no	no	no	no	1	0	0	0	0	1	moderate
93	F	no	no	yes	no	no	no	no	no	no	no	0.72	no	1.8	no	no	no	no	no	no	no	yes	no	no	yes	yes	no	no	no	no	no	no	no	no	1	0	0	0	0	1	moderate
51	F	no	no	no	no	no	no	no	no	no	no	1.19	no	0.8	no	no	no	no	no	no	no	no	no	no	no	no	no	no	no	no	no	no	no	no	1	0	0	0	0	1	moderate
55	F	no	no	yes	no	no	no	no	no	no	no		no		no	no	no	no	no	no	no	no	no	no	no	no	no	no	no	no	no	no	no	no	1	0	0	0	0	1	moderate
83	F	no	no	yes	yes	no	no	no	no	no	no	0.58	no	5.3	no	no	no	no	no	no	no	yes	yes	no	yes	no	no	no	no	no	no	no	no	no	1	0	0	0	0	1	moderate
69	F	no	no	no	no	no	no	no	no	no	no	0.96	no	0.8	yes	no	no	no	no	yes	no	no	no	no	no	no	no	no	no	no	no	no	no	no	1	0	0	0	0	1	moderate
88	F	no	no	yes	no	no	no	no	no	no	no	2.57	no		yes	yes	no	no	no	yes	no	no	no	no	no	no	no	no	no	no	no	no	no	no	1	0	0	0	0	1	moderate
90	F	no	no	no	no	no	no	no	no	no	no	0.8	no	0.8	no	no	no	no	no	yes	no	no	no	no	no	no	no	no	no	no	no	no	no	no	1	0	0	0	0	1	moderate
85	F	no	no	no	no	no	no	no	no	no	no	4.42	no	1.5	yes	no	no	no	no	yes	no	no	no	no	no	no	no	no	no	no	no	no	no	no	1	0	0	0	0	1	moderate
82	F	no	no	no	no	no	no	no	no	no	no	19.2	no	1.2	no	no	yes	no	no	no	no	no	no	no	no	no	no	no	no	no	no	no	no	no	1	0	0	0	0	1	moderate
83	F	no	no	no	yes	no	no	no	no	no	no	0.68	no	12.7	no	no	no	no	no	no	no	no	no	no	no	no	no	no	no	no	no	no	no	no	1	0	0	0	0	1	moderate
89	F	no	no	no	no	no	no	no	no	no	no	9.2	no	1	no	no	no	no	no	no	no	yes	no	yes	no	no	no	no	no	no	yes	yes	no	no	1	0	0	0	0	1	moderate
95	F	no	no	no	no	no	no	no	no	no	no	1.9	no	1.1	no	no	no	no	no	no	no	yes	no	yes	no	no	no	no	no	no	yes	yes	no	no	1	0	0	0	0	1	moderate
76	F	no	no	yes	yes	no	no	no	no	no	no	7.87	no	2	no	no	no	no	no	no	no	yes	no	no	no	no	no	no	no	no	no	no	no	no	1	0	0	0	0	1	moderate
64	F	no	no	yes	yes	no	no	no	no	no	no	0.58	no	1.7	no	yes	no	no	no	no	no	yes	no	yes	no	no	no	no	no	no	no	no	no	no	1	0	0	0	0	1	moderate
90	F	no	no	yes	no	no	no	no	no	yes	no	0.8	no	1.6	no	no	no	no	no	yes	no	no	no	no	no	no	no	no	no	no	no	no	no	no	1	0	0	0	0	1	moderate
88	F	no	no	yes	no	no	no	no	no	yes	no	0.61	no	3	yes	no	no	no	no	no	no	no	no	no	no	no	no	no	no	no	no	no	no	no	1	0	0	0	0	1	moderate
59	F	no	no	no	yes	no	no	no	no	yes	no	5.11	no	2	no	no	no	no	no	no	no	yes	no	no	no	no	no	no	no	no	no	no	no	no	1	0	0	0	0	1	moderate
59	F	no	no	yes	yes	no	no	no	no	yes	no	4.29	no	2	no	no	no	no	no	no	no	yes	no	yes	no	no	no	no	no	no	no	no	no	no	1	0	0	0	0	1	moderate
88	F	no	no	no	no	no	no	no	no	yes	no	0.6	no		no	no	no	no	no	yes	no	yes	no	yes	no	no	no	no	no	no	no	no	no	no	1	0	0	0	0	1	moderate
88	F	no	no	no	no	no	no	no	no	yes	no	3.9	no	6.5	no	no	no	no	no	no	no	yes	no	yes	no	no	no	no	no	no	yes	yes	no	no	1	0	0	0	0	1	moderate
58	F	no	yes	no	no	no	no	no	yes	no	no	0.5	no		no	no	no	no	no	yes	no	no	no	no	no	no	no	no	no	no	no	no	no	no	1	0	0	0	0	1	moderate
50	F	no	no	yes	yes	no	no	no	yes	no	no	3.6	no	11.3	no	no	no	no	no	no	no	yes	no	yes	no	no	no	no	no	no	no	no	no	no	1	0	0	0	0	1	moderate
59	F	no	no	yes	yes	no	no	no	yes	yes	no	1.18	no	2	no	no	no	no	no	no	no	yes	no	no	yes	no	no	no	no	no	no	no	no	no	1	0	0	0	0	1	moderate
37	F	no	yes	no	no	no	no	no	yes	yes	no	4.1	no	2.2	no	yes	no	no	no	yes	no	no	no	no	no	no	no	no	no	no	yes	yes	no	no	1	0	0	0	0	1	moderate
57	F	no	yes	no	no	no	no	no	no	no	no	1.9	no	0.5	no	no	no	no	yes	yes	no	no	no	no	no	no	no	no	no	no	no	no	no	no	1	0	0	0	0	1	moderate
89	F	no	no	no	no	no	no	no	no	no	no	0.96	no	2.6	no	yes	no	no	yes	yes	no	no	no	no	no	no	no	no	no	no	no	no	no	no	1	0	0	0	0	1	moderate
93	F	no	yes	yes	no	no	no	no	no	no	no	0.46	no		yes	no	no	no	yes	yes	no	no	no	no	no	no	no	no	no	no	no	no	no	no	1	0	0	0	0	1	moderate
86	F	no	no	yes	no	no	no	no	no	no	no	0.87	no		yes	no	no	no	yes	yes	no	no	no	no	no	no	no	no	no	no	no	no	no	no	1	0	0	0	0	1	moderate
89	F	no	no	yes	no	no	B-I	yes	no	no	no	1.83	no	2	no	no	no	no	no	no	no	yes	no	yes	no	no	no	no	no	no	no	no	no	no	1	0	0	0	0	1	moderate
89	F	no	no	yes	no	no	B-I	yes	no	no	no	4.55	no	2	no	no	no	no	no	no	no	yes	no	no	no	no	no	no	no	no	no	no	no	no	1	0	0	0	0	1	moderate
89	F	no	no	no	no	no	B-I	yes	no	no	no	9	no	1.36	no	no	no	no	no	yes	no	yes	no	yes	no	no	no	no	no	no	no	no	no	no	1	0	0	0	0	1	moderate
88	F	no	no	no	no	no	B-I	yes	no	no	no	0.6	no		no	no	no	no	no	yes	no	no	no	no	no	no	no	no	no	no	no	no	no	no	1	0	0	0	0	1	moderate
71	F	no	no	no	no	no	R-Y	yes	no	yes	no	0.79	no	1	no	no	no	no	no	no	no	yes	no	no	no	no	no	no	no	no	yes	yes	no	no	1	0	0	0	0	1	moderate
86	F	no	no	no	no	no	R-Y	yes	no	no	no	4	no	0	no	no	no	no	no	no	no	yes	no	yes	no	no	no	no	no	no	no	no	no	no	1	0	0	0	0	1	moderate
82	F	no	no	no	no	no	no	no	no	no	no	0.8	no	1.7	no	no	no	yes	no	yes	no	yes	no	yes	no	no	no	no	no	no	no	no	no	no	1	0	0	0	0	1	moderate
84	F	no	no	yes	no	no	no	no	no	no	no	0.51	no		no	no	no	yes	no	yes	no	no	no	no	no	no	no	no	no	no	no	no	no	no	1	0	0	0	0	1	moderate
84	F	no	no	yes	no	no	no	no	no	no	no	1.6	no		yes	yes	no	yes	no	yes	no	no	no	no	no	no	no	no	no	no	no	no	no	no	1	0	0	0	0	1	moderate
84	F	no	no	yes	no	no	no	no	no	no	no	0.68	no		yes	yes	no	yes	no	yes	no	yes	no	yes	no	no	no	no	no	no	no	no	no	no	1	0	0	0	0	1	moderate
75	F	no	no	yes	no	no	no	no	no	no	no	0.85	no	2.5	yes	no	no	yes	no	no	no	no	no	no	no	no	no	no	no	no	no	no	no	no	1	0	0	0	0	1	moderate
64	F	no	no	yes	no	no	no	no	no	no	no	1.02	no		no	no	no	yes	no	yes	no	no	no	no	no	no	no	no	no	no	no	no	no	no	1	0	0	0	0	1	moderate
73	F	no	no	yes	no	no	no	no	no	no	no	1.03	no		yes	no	no	yes	no	yes	no	no	no	no	no	no	no	no	no	no	no	no	no	no	1	0	0	0	0	1	moderate
80	F	no	no	yes	no	no	R-Y	yes	no	no	no	0.56	no	0	no	no	no	yes	no	yes	no	no	no	no	no	no	no	no	no	no	no	no	no	no	1	0	0	0	0	1	moderate
80	F	no	no	no	no	no	no	no	no	no	yes	3.3	yes	2.4	yes	yes	no	no	no	yes	no	no	no	no	no	no	no	no	no	no	no	no	no	no	1	2	-2	0	0	1	moderate
87	F	no	no	yes	no	no	no	no	no	no	yes	1.4	yes	1	yes	yes	no	no	no	yes	no	no	no	no	no	no	no	no	no	no	no	no	no	no	1	2	-2	0	0	1	moderate
82	F	yes	no	no	no	no	no	no	no	no	yes	1.2	yes	2.61	no	yes	no	no	no	yes	no	no	no	no	no	no	no	no	no	no	no	no	no	no	1	2	-2	0	0	1	moderate
92	F	no	no	yes	no	no	no	no	no	no	yes	0.39	yes	3.2	no	no	no	no	no	no	no	yes	no	yes	no	no	no	no	no	no	no	no	no	no	1	2	-2	0	0	1	moderate
89	F	no	no	no	no	no	no	no	no	no	yes	2.3	yes	0	no	yes	no	no	no	yes	no	no	no	no	no	no	no	no	no	no	no	no	no	no	1	2	-2	0	0	1	moderate
91	F	no	no	no	no	no	no	no	no	no	yes	0.5	yes	0	no	yes	no	no	no	yes	no	no	no	no	no	no	no	no	no	no	no	no	no	no	1	2	-2	0	0	1	moderate
88	F	no	yes	no	no	no	no	no	yes	no	yes	0.6	yes	1.9	no	yes	no	no	no	yes	no	no	no	no	no	no	no	no	no	no	no	no	no	no	1	2	-2	0	0	1	moderate
88	F	no	no	yes	no	no	no	no	no	no	yes	2.1	yes	1	yes	yes	no	no	yes	yes	no	no	no	no	no	no	no	no	no	no	no	no	no	no	1	2	-2	0	0	1	moderate
66	M	no	no	no	yes	no	no	no	no	no	no	1.3	no	7.8	no	no	no	no	no	no	no	yes	no	yes	no	no	yes	yes	no	no	no	no	no	no	0	0	0	2	0	2	moderate
75	M	no	no	yes	no	no	no	no	no	no	no	10.5	no	8.5	yes	yes	no	no	no	no	no	yes	no	yes	no	no	yes	yes	no	no	no	no	no	no	0	0	0	2	0	2	moderate
69	M	no	no	yes	no	no	no	no	no	no	no	1.64	no	3.4	no	no	no	no	no	no	no	yes	no	yes	no	no	yes	yes	no	no	no	no	no	no	0	0	0	2	0	2	moderate
88	M	no	yes	no	no	no	no	no	no	no	no	4.3	no	1.6	yes	yes	no	no	no	yes	no	no	no	no	no	no	yes	yes	no	no	no	no	no	no	0	0	0	2	0	2	moderate
87	M	no	no	yes	no	no	no	no	no	no	no	9.9	no	2.1	no	yes	no	no	no	no	no	yes	no	yes	no	no	yes	yes	yes	yes	no	no	no	no	0	0	0	2	0	2	moderate
68	M	no	no	no	no	no	no	no	no	no	no	0.8	no	6.9	no	no	no	no	no	no	no	yes	no	no	yes	yes	yes	yes	yes	yes	yes	yes	no	no	0	0	0	2	0	2	moderate
88	M	no	no	no	no	no	no	no	no	no	no	1.1	no	6.2	no	no	no	no	no	no	no	no	no	no	no	no	yes	yes	yes	yes	yes	yes	no	no	0	0	0	2	0	2	moderate
54	M	no	no	yes	no	no	no	no	no	no	no	0.7	no	3.6	no	no	no	no	no	no	no	no	no	no	no	no	no	yes	yes	no	no	no	no	no	0	0	0	2	0	2	moderate
81	M	no	no	yes	yes	no	no	no	no	no	no	1.2	no		no	no	no	no	no	no	no	no	no	no	no	no	no	yes	yes	no	no	no	no	no	0	0	0	2	0	2	moderate
81	M	no	no	yes	yes	no	no	no	no	no	no	0.8	no	3	no	no	no	no	no	no	no	no	no	no	no	no	no	yes	yes	no	no	no	no	no	0	0	0	2	0	2	moderate
58	M	no	no	yes	no	no	no	no	no	no	no		no	4.4	no	no	no	no	no	no	no	no	no	no	no	no	no	yes	yes	no	no	no	no	no	0	0	0	2	0	2	moderate
49	M	no	no	no	no	no	no	no	no	no	no	0.6	no	14.6	no	no	no	no	no	no	no	yes	no	yes	no	no	no	yes	yes	no	no	no	no	no	0	0	0	2	0	2	moderate
84	M	no	no	no	no	no	no	no	no	no	no	0.79	no	5.9	no	no	no	no	no	no	no	no	no	no	no	no	no	yes	yes	no	no	no	no	no	0	0	0	2	0	2	moderate
61	M	no	no	yes	no	no	no	no	yes	no	no		no		no	no	no	no	no	no	no	no	no	no	no	no	no	yes	yes	no	no	no	no	no	0	0	0	2	0	2	moderate
75	M	no	no	yes	no	no	no	no	yes	no	no	0.92	no	3	no	no	no	no	no	no	no	no	no	no	no	no	no	yes	yes	no	no	no	no	no	0	0	0	2	0	2	moderate
66	M	no	no	yes	no	no	no	no	yes	no	no	0.6	no	5.9	no	no	no	no	no	no	no	no	no	no	no	no	no	yes	yes	no	no	no	no	no	0	0	0	2	0	2	moderate
52	M	no	no	no	no	no	no	no	yes	no	no	0.6	no		no	no	no	no	no	no	no	yes	no	yes	no	no	no	yes	yes	no	no	no	no	no	0	0	0	2	0	2	moderate
88	M	no	no	no	no	no	no	no	yes	no	no	0.5	no	9.3	no	no	no	no	no	no	no	no	no	no	no	no	no	yes	yes	no	no	no	no	no	0	0	0	2	0	2	moderate
49	M	no	yes	no	no	no	no	no	yes	no	no	1.11	no	6.7	no	no	no	no	no	no	no	no	no	no	no	no	no	yes	yes	no	yes	yes	no	no	0	0	0	2	0	2	moderate
87	M	no	no	yes	no	yes	no	no	no	no	no	1.03	no	11.3	no	no	no	no	no	no	no	yes	no	no	no	no	no	no	no	no	no	no	no	no	0	0	0	0	2	2	moderate
91	M	no	no	no	no	no	B-I	yes	no	no	no	1.9	no	2.79	no	no	no	no	no	yes	no	no	no	no	no	no	yes	yes	no	no	no	no	no	no	0	0	0	2	0	2	moderate
80	M	no	no	yes	no	no	B-I	yes	no	no	no	0.6	no	3.2	no	yes	no	no	no	yes	no	no	no	no	no	no	yes	yes	no	no	yes	yes	no	no	0	0	0	2	0	2	moderate
70	M	no	no	yes	yes	no	no	no	no	no	yes	17.7	no	9.4	no	yes	no	no	no	no	no	yes	no	yes	no	no	no	no	no	no	no	no	no	no	0	2	0	0	0	2	moderate
67	M	no	no	yes	yes	no	no	no	no	no	yes	3.8	no	1.8	no	yes	no	no	no	no	no	yes	no	yes	no	no	no	no	no	no	no	no	no	no	0	2	0	0	0	2	moderate
70	M	no	no	yes	no	no	no	no	no	no	yes	2.5	no	2.1	yes	yes	no	no	no	yes	no	no	no	no	no	no	no	no	no	no	no	no	no	no	0	2	0	0	0	2	moderate
62	M	no	no	yes	no	no	no	no	no	no	yes	6.2	no	1.8	no	yes	no	no	no	yes	no	no	no	no	no	no	no	no	no	no	no	no	no	no	0	2	0	0	0	2	moderate
60	M	no	no	yes	no	no	no	no	no	no	yes	34	no	1.4	no	yes	no	no	no	yes	no	no	no	no	no	no	no	no	no	no	no	no	no	no	0	2	0	0	0	2	moderate
93	M	no	no	yes	no	no	no	no	no	no	yes	2.4	no	1.7	no	yes	no	no	no	no	no	yes	no	yes	no	no	no	no	no	no	no	no	no	no	0	2	0	0	0	2	moderate
62	M	no	no	yes	no	no	no	no	no	no	yes	0.9	no	2.6	no	yes	no	no	no	no	no	yes	no	yes	no	no	no	no	no	no	no	no	no	no	0	2	0	0	0	2	moderate
71	M	no	no	yes	no	no	no	no	no	no	yes	16.75	no	2	no	no	no	no	no	no	no	yes	no	no	no	no	no	no	no	no	no	no	no	no	0	2	0	0	0	2	moderate
74	M	no	no	no	no	no	no	no	no	no	yes	0.7	no	1.8	yes	yes	no	no	no	yes	no	no	no	no	no	no	no	no	no	no	no	no	no	no	0	2	0	0	0	2	moderate
78	M	no	no	yes	no	no	no	no	no	no	yes	28.1	no	2	no	yes	no	no	no	no	no	yes	no	yes	no	no	no	no	no	no	no	no	no	no	0	2	0	0	0	2	moderate
81	M	no	no	yes	no	no	no	no	no	no	yes	0.9	no	1.6	no	yes	no	no	no	yes	no	no	no	no	no	no	no	no	no	no	no	no	no	no	0	2	0	0	0	2	moderate
84	M	no	no	yes	no	no	no	no	no	no	yes	1	no	1	yes	yes	no	no	no	yes	no	no	no	no	no	no	no	no	no	no	no	no	no	no	0	2	0	0	0	2	moderate
72	M	no	no	yes	no	no	no	no	no	no	yes	5.15	no	1.2	no	yes	no	no	no	no	no	yes	no	yes	no	no	no	no	no	no	no	no	no	no	0	2	0	0	0	2	moderate
45	M	no	no	yes	no	no	no	no	no	no	yes	10.7	no	2.2	no	yes	no	no	no	yes	no	no	no	no	no	no	no	no	no	no	no	no	no	no	0	2	0	0	0	2	moderate
38	M	no	no	yes	no	no	no	no	no	no	yes	9.3	no	1.1	no	yes	no	no	no	yes	no	no	no	no	no	no	no	no	no	no	no	no	no	no	0	2	0	0	0	2	moderate
78	M	no	no	no	no	no	no	no	no	no	yes	0.9	no	5.4	yes	yes	no	no	no	yes	no	no	no	no	no	no	no	no	no	no	no	no	no	no	0	2	0	0	0	2	moderate
84	M	no	yes	no	no	no	no	no	no	no	yes	7.4	no	0.5	no	yes	no	no	no	yes	no	no	no	no	no	no	no	no	no	no	no	no	no	no	0	2	0	0	0	2	moderate
44	M	no	no	yes	yes	no	no	no	no	no	yes	12.3	no	0	no	yes	no	no	no	no	no	yes	no	no	no	no	no	no	no	no	no	no	no	no	0	2	0	0	0	2	moderate
61	M	no	no	no	no	no	no	no	no	no	yes	9.9	no	1	no	yes	no	no	no	no	no	yes	no	yes	no	no	no	no	no	no	no	no	no	no	0	2	0	0	0	2	moderate
61	M	no	no	yes	no	no	no	no	no	no	yes	24.9	no	1.1	no	yes	no	no	no	no	no	yes	no	yes	no	no	no	no	no	no	no	no	no	no	0	2	0	0	0	2	moderate
84	M	no	no	yes	no	no	no	no	no	no	yes	1.2	no	6.3	no	yes	no	no	no	no	no	yes	no	yes	no	no	no	no	no	no	no	no	no	no	0	2	0	0	0	2	moderate
76	M	no	no	no	no	no	no	no	no	no	yes	4.9	no	1.5	no	yes	no	no	no	yes	no	yes	no	yes	no	no	no	no	no	no	no	no	no	no	0	2	0	0	0	2	moderate
79	M	no	no	no	no	no	no	no	no	no	yes	0.7	no	2.1	yes	yes	no	no	no	yes	no	no	no	no	no	no	no	no	no	no	no	no	no	no	0	2	0	0	0	2	moderate
73	M	no	no	yes	yes	no	no	no	no	no	yes	29.1	no	9.4	no	yes	no	no	no	no	no	yes	no	no	no	no	no	no	no	no	no	no	no	no	0	2	0	0	0	2	moderate
74	M	no	no	yes	yes	no	no	no	no	no	yes	5.61	no	7.3	no	yes	no	no	no	no	no	yes	no	no	yes	no	no	no	no	no	no	no	no	no	0	2	0	0	0	2	moderate
89	M	no	no	yes	no	no	no	no	no	no	yes	3.5	no	0	no	yes	no	no	no	yes	no	no	no	no	no	no	no	no	no	no	no	no	no	no	0	2	0	0	0	2	moderate
86	M	no	no	yes	no	no	no	no	no	no	yes	0.46	no	1	no	yes	no	no	no	yes	no	no	no	no	no	no	no	no	no	no	no	no	no	no	0	2	0	0	0	2	moderate
79	M	no	no	no	no	no	no	no	no	no	yes	0.8	no	0.8	yes	yes	no	no	no	yes	no	no	no	no	no	no	no	no	no	no	no	no	no	no	0	2	0	0	0	2	moderate
63	M	no	no	yes	yes	no	no	no	no	no	yes	4.2	no	5.9	no	yes	no	no	no	no	no	yes	no	yes	no	no	no	no	no	no	no	no	no	no	0	2	0	0	0	2	moderate
72	M	no	no	yes	no	no	no	no	no	no	yes	5.24	no	2.9	no	no	no	no	no	no	no	yes	no	no	no	no	no	no	no	no	no	no	no	no	0	2	0	0	0	2	moderate
79	M	no	no	yes	no	no	no	no	no	no	yes	2	no	2.4	yes	yes	no	no	no	yes	no	no	no	no	no	no	no	no	no	no	no	no	no	no	0	2	0	0	0	2	moderate
82	M	no	no	no	no	no	no	no	no	no	yes	1.4	no	3.4	no	yes	no	no	no	yes	no	no	no	no	no	no	no	no	no	no	no	no	no	no	0	2	0	0	0	2	moderate
62	M	no	no	yes	no	no	no	no	no	no	yes	5.68	no	2.9	no	yes	no	no	no	no	no	yes	no	no	no	no	no	no	no	no	no	no	no	no	0	2	0	0	0	2	moderate
68	M	no	yes	no	no	no	no	no	no	no	yes	12.9	no	0.5	no	yes	no	no	no	no	no	yes	no	yes	no	no	no	no	no	no	no	no	no	no	0	2	0	0	0	2	moderate
60	M	no	no	yes	no	no	no	no	no	no	yes	3.63	no	0	no	no	no	no	no	no	no	yes	no	yes	no	no	no	no	no	no	no	no	no	no	0	2	0	0	0	2	moderate
89	M	no	no	yes	no	no	no	no	no	no	yes	14.8	no	4.2	no	yes	no	no	no	no	no	yes	no	yes	no	no	no	no	no	no	no	no	no	no	0	2	0	0	0	2	moderate
74	M	no	no	yes	no	no	no	no	no	no	yes	0.4	no	1.9	no	yes	no	no	no	yes	no	no	no	no	no	no	no	no	no	no	no	no	no	no	0	2	0	0	0	2	moderate
52	M	no	no	no	no	no	no	no	no	no	yes	16.7	no	1.9	no	yes	no	no	no	no	no	yes	no	yes	no	no	no	no	no	no	no	no	no	no	0	2	0	0	0	2	moderate
66	M	no	no	yes	yes	no	no	no	no	no	yes	0.4	no	2.7	no	yes	no	no	no	no	no	yes	no	no	yes	no	no	no	no	no	no	no	no	no	0	2	0	0	0	2	moderate
80	M	no	no	yes	no	no	no	no	no	no	yes	5.4	no	1.5	no	yes	no	no	no	no	no	yes	no	no	no	no	no	no	no	no	no	no	no	no	0	2	0	0	0	2	moderate
72	M	no	no	yes	no	no	no	no	no	no	yes	3.3	no	1.2	yes	yes	no	no	no	yes	no	no	no	no	no	no	no	no	no	no	no	no	no	no	0	2	0	0	0	2	moderate
91	M	no	yes	no	no	no	no	no	no	no	yes	1	no	1.9	no	yes	no	no	no	yes	no	no	no	no	no	no	no	no	no	no	no	no	no	no	0	2	0	0	0	2	moderate
72	M	no	no	no	no	no	no	no	no	no	yes	2.2	no	0.5	no	yes	no	no	no	yes	no	no	no	no	no	no	no	no	no	no	no	no	no	no	0	2	0	0	0	2	moderate
68	M	no	no	yes	no	no	no	no	no	no	yes	4.7	no	1.4	no	yes	no	no	no	no	no	yes	no	yes	no	no	no	no	no	no	no	no	no	no	0	2	0	0	0	2	moderate
84	M	no	no	yes	no	no	no	no	no	no	yes	0.9	no	1.7	yes	yes	no	no	no	yes	no	no	no	no	no	no	no	no	no	no	no	no	no	no	0	2	0	0	0	2	moderate
77	M	no	no	yes	no	no	no	no	no	no	yes	5.1	no	2.9	no	yes	no	no	no	no	no	yes	no	yes	no	no	no	no	no	no	no	no	no	no	0	2	0	0	0	2	moderate
88	M	no	no	yes	no	no	no	no	no	no	yes	2.8	no	1	no	no	no	no	no	no	no	yes	no	no	no	no	no	no	no	no	no	no	no	no	0	2	0	0	0	2	moderate
50	M	no	no	no	no	no	no	no	no	no	yes	0.47	no	2.6	no	yes	no	no	no	no	no	no	no	no	no	no	no	no	no	no	no	no	no	no	0	2	0	0	0	2	moderate
82	M	no	yes	no	no	no	no	no	no	no	yes	19.6	no	0.5	no	yes	no	no	no	yes	no	yes	no	yes	no	no	no	no	no	no	no	no	no	no	0	2	0	0	0	2	moderate
55	M	no	no	yes	no	no	no	no	no	no	yes	0.63	no	0	no	no	no	no	no	yes	no	no	no	no	no	no	no	no	no	no	no	no	no	no	0	2	0	0	0	2	moderate
86	M	no	no	no	no	no	no	no	no	no	yes	3.5	no	2.9	yes	yes	no	no	no	no	no	yes	no	yes	no	no	no	no	no	no	no	no	no	no	0	2	0	0	0	2	moderate
85	M	no	no	yes	no	no	no	no	no	no	yes	1.6	no		no	no	no	no	no	no	no	yes	no	yes	no	no	no	no	no	no	no	no	no	no	0	2	0	0	0	2	moderate
72	M	no	no	no	no	no	no	no	no	no	yes	2.5	no	1.8	no	yes	no	no	no	yes	no	no	no	no	no	no	no	no	no	no	no	no	no	no	0	2	0	0	0	2	moderate
78	M	no	no	yes	no	no	no	no	no	no	yes	1	no	1.7	no	yes	no	no	no	no	no	yes	no	yes	no	no	no	no	no	no	no	no	no	no	0	2	0	0	0	2	moderate
89	M	no	no	yes	no	no	no	no	no	no	yes	0.32	no	2.9	no	no	no	no	no	no	no	no	no	no	no	no	no	no	no	no	no	no	no	no	0	2	0	0	0	2	moderate
67	M	no	no	yes	no	no	no	no	no	no	yes	0.87	no	2	no	yes	no	no	no	yes	no	no	no	no	no	no	no	no	no	no	no	no	no	no	0	2	0	0	0	2	moderate
79	M	no	yes	no	no	no	no	no	no	no	yes	4.1	no	1.8	yes	yes	no	no	no	yes	no	no	no	no	no	no	no	no	no	no	no	no	no	no	0	2	0	0	0	2	moderate
70	M	no	no	no	no	no	no	no	no	no	yes	0.9	no	1.7	no	yes	no	no	no	yes	no	no	no	no	no	no	no	no	no	no	no	no	no	no	0	2	0	0	0	2	moderate
73	M	no	no	no	no	no	no	no	no	no	yes	0.9	no	1.8	no	yes	no	no	no	yes	no	no	no	no	no	no	no	no	no	no	no	no	no	no	0	2	0	0	0	2	moderate
82	M	no	no	yes	no	no	no	no	no	no	yes	2.8	no	4.4	yes	yes	no	no	no	yes	no	no	no	no	no	no	no	no	no	no	no	no	no	no	0	2	0	0	0	2	moderate
62	M	no	no	yes	yes	no	no	no	no	no	yes	8.4	no	6.4	yes	yes	no	no	no	no	no	yes	no	yes	no	no	no	no	no	no	no	no	no	no	0	2	0	0	0	2	moderate
82	M	no	no	no	no	no	no	no	no	no	yes	1.2	no	3	yes	yes	no	no	no	yes	no	no	no	no	no	no	no	no	no	no	no	no	no	no	0	2	0	0	0	2	moderate
70	M	no	no	yes	yes	no	no	no	no	no	yes	21.4	no	4.5	no	no	no	no	no	no	no	yes	no	yes	no	no	no	no	no	no	no	no	no	no	0	2	0	0	0	2	moderate
62	M	no	no	no	no	no	no	no	no	no	yes	22.4	no	1.4	no	yes	no	no	no	no	no	yes	no	yes	no	no	no	no	no	no	no	no	no	no	0	2	0	0	0	2	moderate
61	M	no	no	yes	no	no	no	no	no	no	yes	0.51	no	1.8	no	yes	no	no	no	no	no	yes	no	yes	no	no	no	no	no	no	no	no	no	no	0	2	0	0	0	2	moderate
74	M	no	no	no	no	no	no	no	no	no	yes	6.3	no	0	yes	no	no	no	no	yes	no	no	no	no	no	no	no	no	no	no	no	no	no	no	0	2	0	0	0	2	moderate
82	M	no	no	no	no	no	no	no	no	no	yes	2.9	no	0	no	no	no	no	no	no	no	yes	no	yes	no	no	no	no	no	no	no	no	no	no	0	2	0	0	0	2	moderate
80	M	no	no	no	no	no	no	no	no	no	yes	9.2	no	2.3	no	yes	no	no	no	yes	no	yes	no	yes	no	no	no	no	no	no	no	no	no	no	0	2	0	0	0	2	moderate
74	M	no	no	yes	no	no	no	no	no	no	yes	24.22	no	5	no	yes	no	no	no	no	no	yes	no	yes	no	no	no	no	no	no	no	no	no	no	0	2	0	0	0	2	moderate
70	M	no	no	yes	no	no	no	no	no	no	yes	4.51	no	2	yes	no	no	no	no	yes	no	no	no	no	no	no	no	no	no	no	no	no	no	no	0	2	0	0	0	2	moderate
91	M	no	no	no	no	no	no	no	no	no	yes	6	no	3.2	no	yes	no	no	no	no	no	yes	no	no	yes	no	no	no	no	no	no	no	no	no	0	2	0	0	0	2	moderate
89	M	no	no	no	no	no	no	no	no	no	yes	1.2	no	1.5	no	yes	no	no	no	yes	no	yes	no	yes	no	no	no	no	no	no	no	no	no	no	0	2	0	0	0	2	moderate
83	M	no	no	no	no	no	no	no	no	no	yes	0.8	no	3.4	no	yes	no	no	no	yes	no	no	no	no	no	no	no	no	no	no	no	no	no	no	0	2	0	0	0	2	moderate
53	M	no	no	no	no	no	no	no	no	no	yes	10.6	no	0	no	yes	no	no	no	yes	no	no	no	no	no	no	no	no	no	no	no	no	no	no	0	2	0	0	0	2	moderate
74	M	no	no	yes	no	no	no	no	no	no	yes	13.81	no		no	no	no	no	no	no	no	yes	no	yes	no	no	no	no	no	no	no	no	no	no	0	2	0	0	0	2	moderate
71	M	no	no	yes	no	no	no	no	no	no	yes	12.79	no	1.5	yes	yes	no	no	no	no	no	yes	yes	no	no	no	no	no	no	no	no	no	no	no	0	2	0	0	0	2	moderate
99	M	no	no	yes	no	no	no	no	no	no	yes	0.75	no		yes	yes	no	no	no	yes	no	yes	no	yes	no	no	no	no	no	no	no	no	no	no	0	2	0	0	0	2	moderate
51	M	yes	no	no	yes	no	no	no	no	no	yes	2.7	no	5.92	no	yes	no	no	no	no	no	yes	no	no	yes	yes	no	no	no	no	no	no	no	no	0	2	0	0	0	2	moderate
76	M	no	no	no	yes	no	no	no	no	no	yes	23.68	no	10.7	no	yes	no	no	no	no	no	yes	no	yes	no	no	no	no	no	no	no	no	no	no	0	2	0	0	0	2	moderate
85	M	no	no	yes	no	no	no	no	no	no	yes	3.3	no	1.7	no	yes	no	no	no	yes	no	no	no	no	no	no	no	no	no	no	no	no	no	no	0	2	0	0	0	2	moderate
79	M	no	no	yes	no	no	no	no	no	no	yes	1	no	9	no	yes	no	no	no	no	no	yes	no	yes	no	no	no	no	no	no	no	no	no	no	0	2	0	0	0	2	moderate
88	M	no	no	no	yes	no	no	no	no	no	yes	2.93	no	6.3	no	yes	no	no	no	no	no	yes	no	yes	no	no	no	no	no	no	no	no	no	no	0	2	0	0	0	2	moderate
80	M	no	no	yes	no	no	no	no	no	no	yes	3.5	no	3.3	yes	yes	no	no	no	yes	no	no	no	no	no	no	no	no	no	no	no	no	no	no	0	2	0	0	0	2	moderate
82	M	no	no	no	no	no	no	no	no	no	yes	2.1	no	0.8	no	yes	no	no	no	yes	no	no	no	no	no	no	no	no	no	no	no	no	no	no	0	2	0	0	0	2	moderate
92	M	no	no	yes	no	no	no	no	no	no	yes	4.89	no	3.3	no	no	no	no	no	no	no	yes	no	yes	no	no	no	no	no	no	no	no	no	no	0	2	0	0	0	2	moderate
80	M	no	no	no	yes	no	no	no	no	no	yes	15.9	no		no	yes	no	no	no	no	no	yes	no	no	yes	no	no	no	no	no	no	no	no	no	0	2	0	0	0	2	moderate
53	M	no	no	no	no	no	no	no	no	no	yes	9.3	no	1	no	yes	no	no	no	no	no	yes	no	yes	no	no	no	no	no	no	no	no	no	no	0	2	0	0	0	2	moderate
49	M	no	no	no	yes	no	no	no	no	no	yes	2.6	no	2	no	yes	no	no	no	no	no	yes	no	no	yes	yes	no	no	no	no	no	no	no	no	0	2	0	0	0	2	moderate
84	M	no	no	no	no	no	no	no	no	no	yes	3.1	no	1.1	no	yes	no	no	no	yes	no	yes	no	yes	no	no	no	no	no	no	no	no	no	no	0	2	0	0	0	2	moderate
93	M	no	no	no	no	no	no	no	no	no	yes	1	no	0	yes	yes	no	no	no	no	no	yes	yes	yes	no	no	no	no	no	no	no	no	no	no	0	2	0	0	0	2	moderate
91	M	no	no	yes	no	no	no	no	no	no	yes	0.7	no	1.7	no	yes	no	no	no	yes	no	no	no	no	no	no	no	no	no	no	no	no	no	no	0	2	0	0	0	2	moderate
62	M	no	no	no	no	no	no	no	no	no	yes	0.7	no		no	yes	no	no	no	yes	no	no	no	no	no	no	no	no	no	no	no	no	no	no	0	2	0	0	0	2	moderate
86	M	no	no	no	no	no	no	no	no	no	yes	1.6	no	1.5	no	yes	no	no	no	yes	no	yes	no	yes	no	no	no	no	no	no	no	no	no	no	0	2	0	0	0	2	moderate
79	M	no	no	yes	no	no	no	no	no	no	yes	0.91	no	2.8	no	yes	no	no	no	yes	no	no	no	no	no	no	no	no	no	no	no	no	no	no	0	2	0	0	0	2	moderate
72	M	no	no	no	no	no	no	no	no	no	yes	3.3	no	2.3	no	yes	no	no	no	yes	no	no	no	no	no	no	no	no	no	no	no	no	no	no	0	2	0	0	0	2	moderate
86	M	no	no	no	no	no	no	no	no	no	yes	3.9	no	1	no	yes	no	no	no	no	no	yes	no	yes	no	no	no	no	no	no	no	no	no	no	0	2	0	0	0	2	moderate
70	M	no	no	no	no	no	no	no	no	no	yes	1.94	no	2.3	no	yes	no	no	no	yes	no	no	no	no	no	no	no	no	no	no	no	no	no	no	0	2	0	0	0	2	moderate
60	M	no	no	no	no	no	no	no	no	no	yes	7.8	no	0	no	yes	no	no	no	yes	no	no	no	no	no	no	no	no	no	no	no	no	no	no	0	2	0	0	0	2	moderate
88	M	no	no	no	no	no	no	no	no	no	yes	5.37	no	0.8	no	no	no	no	no	no	no	yes	no	yes	no	no	no	no	no	no	no	no	no	no	0	2	0	0	0	2	moderate
50	M	no	no	no	no	no	no	no	no	no	yes	2.6	no	2.2	no	yes	no	no	no	yes	no	no	no	no	no	no	no	no	no	no	no	no	no	no	0	2	0	0	0	2	moderate
69	M	no	no	yes	no	no	no	no	no	no	yes		no		no	no	no	no	no	no	no	yes	no	yes	no	no	no	no	no	no	no	no	no	no	0	2	0	0	0	2	moderate
62	M	no	no	no	no	no	no	no	no	no	yes	3.19	no	0.7	yes	no	no	no	no	no	no	yes	no	yes	no	no	no	no	no	no	no	no	no	no	0	2	0	0	0	2	moderate
92	M	no	no	no	no	no	no	no	no	no	yes	3.02	no	5.1	yes	yes	no	no	no	yes	no	no	no	no	no	no	no	no	no	no	no	no	no	no	0	2	0	0	0	2	moderate
70	M	no	no	yes	no	no	no	no	no	no	yes	0.8	no	1.2	yes	yes	no	no	no	yes	no	yes	no	no	yes	yes	no	no	no	no	no	no	no	no	0	2	0	0	0	2	moderate
83	M	no	no	yes	no	no	no	no	no	no	yes	6.69	no		no	no	no	no	no	no	no	yes	no	yes	no	no	no	no	no	no	no	no	no	no	0	2	0	0	0	2	moderate
81	M	yes	no	no	no	no	no	no	no	no	yes	6.1	no	1.3	yes	no	no	no	no	no	no	yes	no	yes	no	no	no	no	no	no	no	no	no	no	0	2	0	0	0	2	moderate
48	M	no	no	yes	no	no	no	no	no	no	yes	0.51	no	3	no	yes	no	no	no	yes	no	no	no	no	no	no	no	no	no	no	no	no	no	no	0	2	0	0	0	2	moderate
60	M	no	no	yes	yes	no	no	no	no	no	yes	5.5	no	2.4	no	yes	no	no	no	no	no	yes	no	yes	no	no	no	no	no	no	no	no	no	no	0	2	0	0	0	2	moderate
67	M	no	no	no	no	no	no	no	no	no	yes	0.8	no	1.1	no	yes	no	no	no	no	no	no	no	no	no	no	no	no	no	no	no	no	no	no	0	2	0	0	0	2	moderate
73	M	no	no	no	no	no	no	no	no	no	yes	0.8	no	1.8	yes	yes	no	no	no	yes	no	no	no	no	no	no	no	no	no	no	no	no	no	no	0	2	0	0	0	2	moderate
67	M	no	no	yes	no	no	no	no	no	no	yes	19.9	no	3	no	no	no	no	no	no	no	yes	no	no	no	no	no	no	no	no	yes	yes	no	no	0	2	0	0	0	2	moderate
85	M	no	no	yes	no	no	no	no	no	no	yes	0.5	no	2.1	yes	yes	no	no	no	no	no	yes	no	yes	no	no	no	no	no	no	yes	yes	no	no	0	2	0	0	0	2	moderate
55	M	no	no	no	no	no	no	no	no	no	yes	13.9	no	1	yes	yes	no	no	no	no	no	yes	no	yes	no	no	no	no	no	no	yes	no	no	yes	0	2	0	0	0	2	moderate
64	M	no	no	yes	no	no	no	no	no	no	yes	0.58	no	1.3	no	no	no	no	no	no	no	no	no	no	no	no	no	no	no	no	yes	yes	no	no	0	2	0	0	0	2	moderate
76	M	no	no	no	no	no	no	no	no	no	yes	0.7	no	1	no	yes	no	no	no	yes	no	no	no	no	no	no	no	no	no	no	yes	yes	no	no	0	2	0	0	0	2	moderate
76	M	no	no	yes	yes	no	no	no	no	no	yes	0.9	no	7.3	no	no	no	no	no	no	no	yes	no	yes	no	no	no	no	no	no	yes	yes	no	no	0	2	0	0	0	2	moderate
71	M	no	no	yes	no	no	no	no	no	no	yes	13.61	no	2	no	no	no	no	no	no	no	yes	yes	yes	no	no	no	no	no	no	no	no	no	no	0	2	0	0	0	2	moderate
26	M	no	no	yes	no	no	no	no	no	no	yes	2.08	no	1	no	yes	no	no	no	no	no	no	no	no	no	no	no	no	no	no	no	no	no	no	0	2	0	0	0	2	moderate
92	M	no	no	yes	no	no	no	no	no	no	yes	1.58	no	2	yes	yes	no	no	no	yes	no	no	no	no	no	no	no	no	no	no	no	no	no	no	0	2	0	0	0	2	moderate
76	M	no	no	yes	no	no	no	no	no	yes	yes	0.8	no	1.1	no	no	no	no	no	no	no	no	no	no	no	no	no	no	no	no	no	no	no	no	0	2	0	0	0	2	moderate
88	M	no	no	no	no	no	no	no	yes	no	yes	0.7	no	1.54	no	yes	no	no	no	yes	no	no	no	no	no	no	no	no	no	no	no	no	no	no	0	2	0	0	0	2	moderate
92	M	no	no	yes	no	no	no	no	no	no	yes	1.09	no	3	no	yes	no	no	yes	yes	no	no	no	no	no	no	no	no	no	no	no	no	no	no	0	2	0	0	0	2	moderate
90	M	no	yes	no	no	no	no	no	no	no	yes	1.8	no	1.5	yes	yes	no	no	yes	yes	no	no	no	no	no	no	no	no	no	no	no	no	no	no	0	2	0	0	0	2	moderate
88	M	no	no	yes	no	no	no	no	no	no	yes	1.5	no	2.2	no	yes	no	no	yes	yes	no	no	no	no	no	no	no	no	no	no	no	no	no	no	0	2	0	0	0	2	moderate
70	M	no	yes	yes	no	no	no	no	no	no	yes	1.6	no	0.5	yes	yes	no	no	yes	yes	no	no	no	no	no	no	no	no	no	no	no	no	no	no	0	2	0	0	0	2	moderate
85	M	no	no	yes	no	no	no	no	no	no	yes	2.5	no	1.2	no	yes	no	no	yes	yes	no	no	no	no	no	no	no	no	no	no	no	no	no	no	0	2	0	0	0	2	moderate
70	M	no	yes	no	no	no	no	no	no	no	yes	2.5	no	0.5	yes	yes	no	no	yes	yes	no	no	no	no	no	no	no	no	no	no	no	no	no	no	0	2	0	0	0	2	moderate
79	M	no	no	yes	no	no	no	no	no	no	yes	1.3	no	3.6	no	yes	no	no	yes	yes	no	no	no	no	no	no	no	no	no	no	no	no	no	no	0	2	0	0	0	2	moderate
74	M	no	no	yes	no	no	no	no	no	no	yes	2.16	no	3	no	yes	no	no	yes	yes	no	yes	no	yes	no	no	no	no	no	no	no	no	no	no	0	2	0	0	0	2	moderate
61	M	no	no	yes	yes	no	no	no	no	no	yes	5.14	yes	10	no	yes	no	no	no	no	no	yes	no	no	no	no	yes	yes	no	no	no	no	no	no	0	2	-2	2	0	2	moderate
70	M	no	no	yes	yes	no	no	no	no	no	yes	2.1	yes	13.7	yes	yes	yes	no	no	no	no	yes	no	no	no	no	yes	yes	yes	yes	no	no	no	no	0	2	-2	2	0	2	moderate
76	M	no	no	no	no	no	no	no	no	no	yes	4.1	yes	0	no	no	no	no	no	no	no	yes	no	yes	no	no	yes	yes	yes	yes	no	no	no	no	0	2	-2	2	0	2	moderate
83	M	no	no	yes	no	no	no	no	yes	no	yes	0.5	yes	6.5	no	yes	yes	no	no	yes	no	yes	no	no	no	no	yes	yes	yes	yes	no	no	no	no	0	2	-2	2	0	2	moderate
48	M	no	no	yes	no	no	no	no	no	no	yes		yes		no	yes	yes	no	no	no	no	no	no	no	no	no	no	yes	no	no	no	no	no	no	0	2	-2	2	0	2	moderate
73	M	no	no	yes	no	no	no	no	no	no	yes	0.6	yes	12	no	no	no	no	no	no	no	no	no	no	no	no	no	yes	no	no	no	no	no	no	0	2	-2	2	0	2	moderate
64	M	no	no	yes	no	no	no	no	no	no	yes	0.6	yes	10	no	no	no	no	no	no	no	no	no	no	no	no	no	yes	no	no	yes	no	yes	no	0	2	-2	2	0	2	moderate
50	M	no	no	no	no	no	no	no	yes	no	yes	0.5	yes	6.1	no	yes	no	no	no	no	no	no	no	no	no	no	no	yes	no	no	no	no	no	no	0	2	-2	2	0	2	moderate
75	M	no	yes	yes	no	no	no	no	no	no	yes	0.33	yes	9.7	no	yes	yes	no	no	no	no	yes	no	yes	no	no	no	yes	yes	no	no	no	no	no	0	2	-2	2	0	2	moderate
63	M	no	no	yes	no	no	no	no	no	no	yes	1.58	yes	8.8	no	no	no	no	no	no	no	no	no	no	no	no	no	yes	yes	no	no	no	no	no	0	2	-2	2	0	2	moderate
75	M	no	no	yes	no	no	no	no	no	no	yes	0.43	yes	5	yes	no	no	no	no	no	no	no	no	no	no	no	no	yes	yes	no	yes	yes	no	no	0	2	-2	2	0	2	moderate
40	M	no	no	yes	no	no	no	no	yes	no	yes	0.8	yes	2.9	no	no	no	no	no	no	no	no	no	no	no	no	no	yes	yes	no	no	no	no	no	0	2	-2	2	0	2	moderate
50	M	no	no	yes	no	no	no	no	yes	no	yes	0.2	yes	6.6	no	no	no	no	no	no	no	no	no	no	no	no	no	yes	yes	no	no	no	no	no	0	2	-2	2	0	2	moderate
74	M	no	no	yes	no	no	B-I	yes	no	no	yes	1.3	no	2.2	no	yes	no	no	no	yes	no	no	no	no	no	no	no	no	no	no	no	no	no	no	0	2	0	0	0	2	moderate
71	M	no	no	yes	no	no	B-I	yes	no	no	yes	3.13	no	2.4	no	yes	no	no	no	no	no	yes	no	yes	no	no	no	no	no	no	no	no	no	no	0	2	0	0	0	2	moderate
86	M	no	no	yes	no	no	B-I	yes	no	no	yes	3.67	no	0	no	yes	no	no	no	no	no	yes	no	no	no	no	no	no	no	no	no	no	no	no	0	2	0	0	0	2	moderate
76	M	no	no	yes	no	no	B-I	yes	no	no	yes	0.4	no	1	yes	no	no	no	no	no	no	yes	no	yes	no	no	no	no	no	no	no	no	no	no	0	2	0	0	0	2	moderate
79	M	no	no	yes	no	no	B-I	yes	no	no	yes	10.83	no	1.7	no	yes	no	no	no	no	no	yes	yes	no	no	no	no	no	no	no	no	no	no	no	0	2	0	0	0	2	moderate
83	M	no	no	no	no	no	B-I	yes	no	no	yes	7.28	no	2.3	no	yes	no	no	no	yes	no	no	no	no	no	no	no	no	no	no	no	no	no	no	0	2	0	0	0	2	moderate
91	M	no	no	yes	no	no	B-I	yes	no	no	yes	1.3	no	2	no	yes	no	no	yes	yes	no	no	no	no	no	no	no	no	no	no	no	no	no	no	0	2	0	0	0	2	moderate
87	M	no	no	no	no	no	B-I	yes	no	no	yes	3.8	no	3.8	no	yes	no	no	no	yes	no	yes	no	yes	no	no	no	no	no	no	no	no	no	no	0	2	0	0	0	2	moderate
90	M	no	no	no	no	no	B-II	yes	no	no	yes	4.6	no	3.7	no	no	no	no	no	no	no	no	no	no	no	no	no	no	no	no	no	no	no	no	0	2	0	0	0	2	moderate
83	M	no	no	yes	no	no	B-II	yes	no	no	yes	0.7	no	4.7	yes	yes	no	no	yes	yes	no	no	no	no	no	no	no	no	no	no	no	no	no	no	0	2	0	0	0	2	moderate
82	M	yes	no	no	no	no	B-II	yes	no	no	yes	3.9	no	1.26	no	no	no	no	no	no	no	no	no	no	no	no	no	no	no	no	no	no	no	no	0	2	0	0	0	2	moderate
89	M	no	yes	no	no	no	double tract	yes	no	no	yes	9.7	no	0.5	no	yes	no	no	no	yes	no	no	no	no	no	no	no	no	no	no	no	no	no	no	0	2	0	0	0	2	moderate
80	M	no	no	yes	no	no	Gastric tube	yes	no	no	yes	0.61	no	2	yes	no	no	no	no	yes	no	no	no	no	no	no	no	no	no	no	no	no	no	no	0	2	0	0	0	2	moderate
77	M	no	no	yes	no	no	R-Y	yes	no	no	yes	7.1	no	1.6	no	no	no	no	no	no	no	yes	no	yes	no	no	no	no	no	no	no	no	no	no	0	2	0	0	0	2	moderate
69	M	no	no	yes	no	no	R-Y	yes	no	no	yes	1.2	no	1.2	yes	yes	no	no	yes	yes	no	no	no	no	no	no	no	no	no	no	no	no	no	no	0	2	0	0	0	2	moderate
89	M	no	no	yes	no	no	R-Y	yes	no	no	yes	1.2	no	3.1	no	yes	no	no	yes	yes	no	no	no	no	no	no	no	no	no	no	no	no	no	no	0	2	0	0	0	2	moderate
82	M	no	no	yes	no	no	R-Y	yes	no	no	yes	0.74	no	3.6	no	no	no	no	no	yes	no	no	no	no	no	no	no	no	no	no	yes	yes	no	no	0	2	0	0	0	2	moderate
90	M	no	no	yes	no	no	R-Y	yes	no	no	yes	9.59	no	2.7	no	no	no	no	no	no	no	yes	no	yes	no	no	no	no	no	no	yes	yes	no	no	0	2	0	0	0	2	moderate
67	M	no	no	yes	no	no	R-Y	yes	no	no	yes	1.02	no	2.9	yes	no	no	no	yes	yes	no	no	no	no	no	no	no	no	no	no	no	no	no	no	0	2	0	0	0	2	moderate
92	M	no	no	no	yes	no	R-Y	yes	no	no	yes	18.1	no	3.26	no	no	no	no	no	no	no	no	no	no	no	no	no	no	no	no	no	no	no	no	0	2	0	0	0	2	moderate
68	M	no	no	yes	no	no	R-Y	yes	no	no	yes	9.2	no	2.8	no	yes	no	no	no	no	no	yes	no	yes	no	no	no	no	no	no	no	no	no	no	0	2	0	0	0	2	moderate
85	M	no	no	yes	no	no	R-Y	yes	no	no	yes	1.8	no	1.2	no	yes	no	no	yes	yes	no	no	no	no	no	no	no	no	no	no	no	no	no	no	0	2	0	0	0	2	moderate
81	M	no	no	yes	no	no	R-Y	yes	no	no	yes	0.79	no	3.6	no	no	no	no	yes	yes	no	yes	no	yes	no	no	no	no	no	no	no	no	no	no	0	2	0	0	0	2	moderate
89	M	no	no	yes	no	no	no	no	no	no	yes	11.1	no	0.8	no	yes	no	yes	no	yes	no	no	no	no	no	no	no	no	no	no	no	no	no	no	0	2	0	0	0	2	moderate
66	M	no	no	yes	no	no	no	no	no	no	yes	1	no	1.5	yes	yes	no	yes	no	no	no	yes	no	yes	no	no	no	no	no	no	no	no	no	no	0	2	0	0	0	2	moderate
78	M	no	no	yes	no	no	no	no	no	no	yes	1.3	no	1.8	yes	yes	no	yes	no	yes	no	no	no	no	no	no	no	no	no	no	no	no	no	no	0	2	0	0	0	2	moderate
85	M	no	no	yes	no	no	no	no	no	no	yes	0.83	no	2	no	no	no	yes	no	yes	no	no	no	no	no	no	no	no	no	no	no	no	no	no	0	2	0	0	0	2	moderate
74	M	no	no	no	no	no	B-II	yes	no	no	yes	1.4	no	2.2	no	yes	no	yes	no	yes	no	no	no	no	no	no	no	no	no	no	no	no	no	no	0	2	0	0	0	2	moderate
86	M	no	no	yes	no	no	B-II	yes	no	no	yes	0.95	no		no	no	no	yes	no	yes	no	no	no	no	no	no	no	no	no	no	no	no	no	no	0	2	0	0	0	2	moderate
75	M	no	no	yes	no	no	R-Y	yes	no	no	yes	1.3	no	1.9	yes	yes	no	yes	no	yes	no	no	no	no	no	no	no	no	no	no	no	no	no	no	0	2	0	0	0	2	moderate
81	M	no	no	no	no	no	R-Y	yes	no	no	yes	2.1	no	6	no	yes	no	yes	no	no	no	yes	no	no	yes	no	no	no	no	no	no	no	no	no	0	2	0	0	0	2	moderate
64	F	no	no	yes	no	no	no	no	no	no	no	5.1	no	1	no	yes	no	no	no	no	no	yes	no	yes	no	no	yes	yes	no	no	no	no	no	no	1	0	0	2	0	3	moderate
96	F	no	no	no	yes	no	no	no	no	no	no	3.37	no	10	no	no	no	no	no	no	no	yes	no	yes	no	no	yes	yes	no	no	no	no	no	no	1	0	0	2	0	3	moderate
92	F	no	no	no	no	no	no	no	no	no	no	0.41	no		no	no	no	no	no	yes	no	yes	no	yes	no	no	yes	yes	no	no	no	no	no	no	1	0	0	2	0	3	moderate
70	F	no	no	yes	no	no	no	no	no	no	no	0.86	no	3.9	no	yes	no	no	no	no	no	yes	no	yes	no	no	yes	yes	no	no	no	no	no	no	1	0	0	2	0	3	moderate
70	F	no	no	no	yes	no	no	no	no	no	no	0.3	no	5.3	no	no	no	no	no	no	no	yes	no	no	yes	yes	yes	yes	no	no	no	no	no	no	1	0	0	2	0	3	moderate
89	F	yes	yes	no	no	no	no	no	no	no	no	0.9	no	1.85	no	no	no	no	no	no	no	yes	no	no	yes	yes	yes	yes	no	no	no	no	no	no	1	0	0	2	0	3	moderate
78	F	no	no	yes	no	no	no	no	yes	no	no	0.1	no	2	yes	no	no	no	no	no	no	no	no	no	no	no	yes	yes	no	no	no	no	no	no	1	0	0	2	0	3	moderate
87	F	no	no	yes	no	no	no	no	no	no	no	13.34	no	3.4	no	no	no	no	no	no	no	yes	no	yes	no	no	yes	yes	yes	yes	no	no	no	no	1	0	0	2	0	3	moderate
81	F	no	no	yes	yes	no	no	no	yes	no	no	0.87	no	8	no	no	no	no	no	no	no	yes	no	yes	no	no	yes	yes	yes	yes	no	no	no	no	1	0	0	2	0	3	moderate
57	F	no	no	yes	no	no	no	no	no	no	no	0.4	no	1	no	no	no	no	no	no	no	no	no	no	no	no	no	yes	yes	no	no	no	no	no	1	0	0	2	0	3	moderate
90	F	no	no	no	no	no	no	no	no	no	no	4.9	no	0	no	no	no	no	no	no	no	yes	no	no	yes	no	no	yes	yes	no	no	no	no	no	1	0	0	2	0	3	moderate
72	F	no	yes	no	no	no	no	no	yes	yes	no	0.7	no		no	no	no	no	no	no	no	no	no	no	no	no	no	yes	yes	no	no	no	no	no	1	0	0	2	0	3	moderate
80	F	no	no	yes	no	no	no	no	no	no	no	0.7	no	2	yes	yes	no	yes	no	yes	no	no	no	no	no	no	yes	yes	yes	yes	no	no	no	no	1	0	0	2	0	3	moderate
59	F	no	no	yes	no	no	no	no	no	no	no	0.68	no	2.8	yes	no	no	yes	no	no	no	no	no	no	no	no	yes	yes	yes	yes	no	no	no	no	1	0	0	2	0	3	moderate
70	F	no	no	yes	no	no	no	no	no	no	yes	4.5	no	1.8	yes	yes	no	no	no	yes	no	no	no	no	no	no	no	no	no	no	no	no	no	no	1	2	0	0	0	3	moderate
73	F	no	yes	no	no	no	no	no	no	no	yes	2.8	no		no	yes	no	no	no	yes	no	no	no	no	no	no	no	no	no	no	no	no	no	no	1	2	0	0	0	3	moderate
72	F	no	no	yes	no	no	no	no	no	no	yes	1.4	no	3.3	no	yes	no	no	no	no	no	yes	no	yes	no	no	no	no	no	no	no	no	no	no	1	2	0	0	0	3	moderate
60	F	no	yes	no	no	no	no	no	no	no	yes	1	no	1.7	no	yes	no	no	no	yes	no	no	no	no	no	no	no	no	no	no	no	no	no	no	1	2	0	0	0	3	moderate
66	F	no	no	yes	no	no	no	no	no	no	yes	1.7	no	2.1	no	yes	no	no	no	no	no	no	no	no	no	no	no	no	no	no	no	no	no	no	1	2	0	0	0	3	moderate
72	F	no	yes	no	no	no	no	no	no	no	yes	0.8	no	0.5	yes	yes	no	no	no	yes	no	no	no	no	no	no	no	no	no	no	no	no	no	no	1	2	0	0	0	3	moderate
61	F	no	no	no	no	no	no	no	no	no	yes	7.4	no	2.6	no	yes	no	no	no	yes	no	yes	no	yes	no	no	no	no	no	no	no	no	no	no	1	2	0	0	0	3	moderate
103	F	no	no	yes	no	no	no	no	no	no	yes	0.79	no	0	no	yes	no	no	no	yes	no	no	no	no	no	no	no	no	no	no	no	no	no	no	1	2	0	0	0	3	moderate
75	F	no	no	yes	no	no	no	no	no	no	yes	0.72	no	0	no	yes	no	no	no	yes	no	no	no	no	no	no	no	no	no	no	no	no	no	no	1	2	0	0	0	3	moderate
61	F	no	no	yes	yes	no	no	no	no	no	yes	6	no	0	no	yes	no	no	no	no	no	yes	yes	no	yes	no	no	no	no	no	no	no	no	no	1	2	0	0	0	3	moderate
25	F	no	no	yes	no	no	no	no	no	no	yes	0.7	no	2.4	no	yes	no	no	no	yes	no	no	no	no	no	no	no	no	no	no	no	no	no	no	1	2	0	0	0	3	moderate
87	F	no	no	no	no	no	no	no	no	no	yes	5.4	no	2.8	no	yes	no	no	no	no	no	yes	no	yes	no	no	no	no	no	no	no	no	no	no	1	2	0	0	0	3	moderate
88	F	no	no	yes	no	no	no	no	no	no	yes	0.74	no	0	no	no	no	no	no	no	no	yes	no	no	no	no	no	no	no	no	no	no	no	no	1	2	0	0	0	3	moderate
85	F	no	no	no	no	no	no	no	no	no	yes	1.4	no	3	no	yes	no	no	no	yes	no	no	no	no	no	no	no	no	no	no	no	no	no	no	1	2	0	0	0	3	moderate
73	F	no	no	yes	yes	no	no	no	no	no	yes	19.06	no	7.7	no	no	no	no	no	no	no	yes	yes	no	no	no	no	no	no	no	no	no	no	no	1	2	0	0	0	3	moderate
60	F	no	yes	no	no	no	no	no	no	no	yes	1	no	1.9	yes	yes	no	no	no	yes	no	no	no	no	no	no	no	no	no	no	no	no	no	no	1	2	0	0	0	3	moderate
86	F	no	no	no	no	no	no	no	no	no	yes	0.4	no	3.8	yes	yes	no	no	no	no	no	yes	no	yes	no	no	no	no	no	no	no	no	no	no	1	2	0	0	0	3	moderate
86	F	no	yes	no	no	no	no	no	no	no	yes	1.9	no	2	no	yes	no	no	no	no	no	yes	no	yes	no	no	no	no	no	no	no	no	no	no	1	2	0	0	0	3	moderate
81	F	no	no	no	no	no	no	no	no	no	yes	0.4	no		yes	yes	no	no	no	yes	no	no	no	no	no	no	no	no	no	no	no	no	no	no	1	2	0	0	0	3	moderate
78	F	no	no	yes	yes	no	no	no	no	no	yes	3.3	no	4.4	no	yes	no	no	no	no	no	yes	no	yes	no	no	no	no	no	no	no	no	no	no	1	2	0	0	0	3	moderate
74	F	no	no	yes	no	no	no	no	no	no	yes	1.1	no	1.3	yes	yes	no	no	no	yes	no	no	no	no	no	no	no	no	no	no	no	no	no	no	1	2	0	0	0	3	moderate
89	F	no	no	no	no	no	no	no	no	no	yes	7.4	no	1	no	yes	no	no	no	no	no	yes	yes	no	yes	no	no	no	no	no	no	no	no	no	1	2	0	0	0	3	moderate
73	F	no	no	yes	no	no	no	no	no	no	yes	1.1	no	1.7	no	yes	no	no	no	yes	no	no	no	no	no	no	no	no	no	no	no	no	no	no	1	2	0	0	0	3	moderate
76	F	no	no	yes	no	no	no	no	no	no	yes	1	no	1.5	no	yes	no	no	no	no	no	yes	no	yes	no	no	no	no	no	no	no	no	no	no	1	2	0	0	0	3	moderate
68	F	no	no	yes	no	no	no	no	no	no	yes	0.7	no	1.9	no	yes	no	no	no	yes	no	no	no	no	no	no	no	no	no	no	no	no	no	no	1	2	0	0	0	3	moderate
75	F	no	no	yes	no	no	no	no	no	no	yes	1.52	no	0	no	yes	no	no	no	no	no	yes	no	no	no	no	no	no	no	no	no	no	no	no	1	2	0	0	0	3	moderate
81	F	no	no	yes	yes	no	no	no	no	no	yes	4.76	no	0	no	no	no	no	no	no	no	yes	no	yes	no	no	no	no	no	no	no	no	no	no	1	2	0	0	0	3	moderate
78	F	no	no	yes	no	no	no	no	no	no	yes	3.4	no	2.1	yes	yes	no	no	no	yes	no	no	no	no	no	no	no	no	no	no	no	no	no	no	1	2	0	0	0	3	moderate
92	F	no	no	yes	no	no	no	no	no	no	yes	0.59	no	2.4	yes	yes	no	no	no	no	no	yes	no	yes	no	no	no	no	no	no	no	no	no	no	1	2	0	0	0	3	moderate
92	F	no	no	yes	yes	no	no	no	no	no	yes	10.97	no	8.7	no	yes	no	no	no	no	no	yes	no	no	yes	yes	no	no	no	no	no	no	no	no	1	2	0	0	0	3	moderate
74	F	no	no	yes	no	no	no	no	no	no	yes	0.6	no		yes	yes	no	no	no	yes	no	no	no	no	no	no	no	no	no	no	no	no	no	no	1	2	0	0	0	3	moderate
79	F	no	no	yes	no	no	no	no	no	no	yes	6.2	no	1.5	no	no	no	no	no	no	no	yes	no	yes	no	no	no	no	no	no	no	no	no	no	1	2	0	0	0	3	moderate
81	F	no	no	yes	no	no	no	no	no	no	yes	5.7	no	1	no	yes	no	no	no	no	no	yes	no	no	no	no	no	no	no	no	no	no	no	no	1	2	0	0	0	3	moderate
78	F	no	no	yes	yes	no	no	no	no	no	yes	1.2	no	2.3	no	yes	no	no	no	no	no	yes	no	yes	no	no	no	no	no	no	no	no	no	no	1	2	0	0	0	3	moderate
82	F	no	no	yes	no	no	no	no	no	no	yes	1.5	no		no	yes	no	no	no	yes	no	no	no	no	no	no	no	no	no	no	no	no	no	no	1	2	0	0	0	3	moderate
84	F	no	no	yes	no	no	no	no	no	no	yes	3.4	no	2.1	yes	yes	no	no	no	no	no	yes	no	no	no	no	no	no	no	no	no	no	no	no	1	2	0	0	0	3	moderate
91	F	no	no	yes	no	no	no	no	no	no	yes	3.6	no	2	yes	yes	no	no	no	yes	no	no	no	no	no	no	no	no	no	no	no	no	no	no	1	2	0	0	0	3	moderate
84	F	no	no	yes	no	no	no	no	no	no	yes	2.8	no		no	no	no	no	no	no	no	yes	no	yes	no	no	no	no	no	no	no	no	no	no	1	2	0	0	0	3	moderate
66	F	no	no	no	no	no	no	no	no	no	yes	7.8	no	0.8	no	yes	no	no	no	no	no	yes	no	yes	no	no	no	no	no	no	no	no	no	no	1	2	0	0	0	3	moderate
92	F	no	no	yes	no	no	no	no	no	no	yes	0.82	no	2	yes	yes	no	no	no	no	no	yes	no	yes	no	no	no	no	no	no	no	no	no	no	1	2	0	0	0	3	moderate
87	F	no	no	yes	no	no	no	no	no	no	yes	1.3	no	2.1	yes	no	no	no	no	no	no	no	no	no	no	no	no	no	no	no	no	no	no	no	1	2	0	0	0	3	moderate
73	F	no	no	no	yes	no	no	no	no	no	yes	5.75	no	15.6	yes	no	no	no	no	no	no	yes	no	yes	no	no	no	no	no	no	no	no	no	no	1	2	0	0	0	3	moderate
82	F	no	no	yes	no	no	no	no	no	no	yes	3.43	no	6	yes	no	no	no	no	no	no	yes	no	no	no	no	no	no	no	no	no	no	no	no	1	2	0	0	0	3	moderate
80	F	no	no	no	no	no	no	no	no	no	yes	6.7	no	3.8	no	yes	no	no	no	no	no	yes	no	yes	no	no	no	no	no	no	no	no	no	no	1	2	0	0	0	3	moderate
67	F	no	no	yes	no	no	no	no	no	no	yes	1.35	no	1	no	yes	no	no	no	no	no	yes	no	yes	no	no	no	no	no	no	no	no	no	no	1	2	0	0	0	3	moderate
79	F	no	no	no	no	no	no	no	no	no	yes	1.6	no	1.5	no	yes	no	no	no	yes	no	no	no	no	no	no	no	no	no	no	no	no	no	no	1	2	0	0	0	3	moderate
66	F	no	no	yes	yes	no	no	no	no	no	yes	1.1	no	3	no	yes	no	no	no	no	no	yes	no	no	yes	no	no	no	no	no	no	no	no	no	1	2	0	0	0	3	moderate
77	F	no	no	yes	no	no	no	no	no	no	yes	2.6	no	2.6	yes	yes	no	no	no	yes	no	no	no	no	no	no	no	no	no	no	no	no	no	no	1	2	0	0	0	3	moderate
79	F	no	no	yes	no	no	no	no	no	no	yes	10	no	4.1	no	yes	no	no	no	no	no	yes	no	yes	no	no	no	no	no	no	no	no	no	no	1	2	0	0	0	3	moderate
84	F	no	no	no	no	no	no	no	no	no	yes	1.1	no	2.6	yes	yes	no	no	no	no	no	yes	no	yes	no	no	no	no	no	no	no	no	no	no	1	2	0	0	0	3	moderate
92	F	no	yes	yes	no	no	no	no	no	no	yes	0.64	no	2.9	yes	yes	no	no	no	no	no	yes	no	yes	no	no	no	no	no	no	no	no	no	no	1	2	0	0	0	3	moderate
84	F	no	no	no	no	no	no	no	no	no	yes	1.6	no		no	yes	no	no	no	yes	no	no	no	no	no	no	no	no	no	no	no	no	no	no	1	2	0	0	0	3	moderate
87	F	no	no	yes	no	no	no	no	no	no	yes	0.86	no	1.9	yes	yes	no	no	no	no	no	yes	no	yes	no	no	no	no	no	no	no	no	no	no	1	2	0	0	0	3	moderate
82	F	no	no	no	no	no	no	no	no	no	yes	1.16	no	3	yes	yes	no	no	no	yes	no	no	no	no	no	no	no	no	no	no	no	no	no	no	1	2	0	0	0	3	moderate
94	F	yes	no	no	no	no	no	no	no	no	yes	5	no	2.65	no	yes	no	no	no	no	no	yes	no	no	yes	yes	no	no	no	no	no	no	no	no	1	2	0	0	0	3	moderate
87	F	no	no	no	yes	no	no	no	no	no	yes	7.8	no	5.8	no	no	no	no	no	no	no	no	no	no	no	no	no	no	no	no	no	no	no	no	1	2	0	0	0	3	moderate
93	F	no	no	yes	no	no	no	no	no	no	yes	0.45	no		no	yes	no	no	no	no	no	yes	no	yes	no	no	no	no	no	no	no	no	no	no	1	2	0	0	0	3	moderate
81	F	no	no	yes	yes	no	no	no	no	no	yes	9.86	no	3.6	no	yes	no	no	no	no	no	yes	no	yes	no	no	no	no	no	no	no	no	no	no	1	2	0	0	0	3	moderate
87	F	no	no	no	no	no	no	no	no	no	yes	1	no	3.2	no	yes	no	no	no	yes	no	no	no	no	no	no	no	no	no	no	no	no	no	no	1	2	0	0	0	3	moderate
79	F	no	no	yes	no	no	no	no	no	no	yes	0.45	no		no	no	no	no	no	no	no	yes	no	yes	no	no	no	no	no	no	no	no	no	no	1	2	0	0	0	3	moderate
64	F	no	no	yes	no	no	no	no	no	no	yes	3.91	no	1.1	no	yes	no	no	no	no	no	yes	no	yes	no	no	no	no	no	no	no	no	no	no	1	2	0	0	0	3	moderate
73	F	no	no	no	no	no	no	no	no	no	yes	1.96	no	0.7	no	no	no	no	no	no	no	yes	no	yes	no	no	no	no	no	no	no	no	no	no	1	2	0	0	0	3	moderate
83	F	no	no	yes	yes	no	no	no	no	no	yes	5.15	no	10	no	yes	no	no	no	no	no	yes	no	no	yes	no	no	no	no	no	no	no	no	no	1	2	0	0	0	3	moderate
56	F	no	no	yes	no	no	no	no	no	no	yes	0.51	no		no	yes	no	no	no	no	no	no	no	no	no	no	no	no	no	no	no	no	no	no	1	2	0	0	0	3	moderate
54	F	no	no	yes	no	no	no	no	no	no	yes		no	2	no	yes	no	no	no	no	no	yes	no	yes	no	no	no	no	no	no	no	no	no	no	1	2	0	0	0	3	moderate
83	F	no	no	yes	yes	no	no	no	no	no	yes	13.1	no	7.2	no	yes	no	no	no	no	no	yes	no	yes	no	no	no	no	no	no	no	no	no	no	1	2	0	0	0	3	moderate
88	F	no	no	yes	no	no	no	no	no	no	yes	1.64	no	2.1	no	yes	no	no	no	no	no	yes	no	yes	no	no	no	no	no	no	no	no	no	no	1	2	0	0	0	3	moderate
88	F	no	no	no	no	no	no	no	no	no	yes	11	no	1.9	no	yes	no	no	no	no	no	yes	no	yes	no	no	no	no	no	no	no	no	no	no	1	2	0	0	0	3	moderate
68	F	no	no	yes	no	no	no	no	no	no	yes	1.7	no	2	no	yes	no	no	no	yes	no	no	no	no	no	no	no	no	no	no	no	no	no	no	1	2	0	0	0	3	moderate
83	F	no	no	yes	yes	no	no	no	no	no	yes	9.27	no	7.1	no	no	no	no	no	no	no	no	no	no	no	no	no	no	no	no	no	no	no	no	1	2	0	0	0	3	moderate
46	F	no	yes	yes	no	no	no	no	no	no	yes	3.51	no		no	yes	no	no	no	yes	no	yes	no	yes	no	no	no	no	no	no	no	no	no	no	1	2	0	0	0	3	moderate
81	F	yes	no	no	no	no	no	no	no	no	yes	0.6	no	2.7	no	yes	no	no	no	yes	no	no	no	no	no	no	no	no	no	no	no	no	no	no	1	2	0	0	0	3	moderate
82	F	no	no	no	yes	no	no	no	no	no	yes	0.7	no	11.2	no	yes	no	no	no	no	no	yes	no	yes	no	no	no	no	no	no	no	no	no	no	1	2	0	0	0	3	moderate
86	F	no	no	yes	no	no	no	no	no	no	yes	2.05	no		yes	yes	no	no	no	yes	no	yes	no	yes	no	no	no	no	no	no	no	no	no	no	1	2	0	0	0	3	moderate
75	F	no	no	no	no	no	no	no	no	no	yes	5.2	no	0	yes	no	no	no	no	no	no	yes	no	yes	no	no	no	no	no	no	no	no	no	no	1	2	0	0	0	3	moderate
71	F	no	no	yes	no	no	no	no	no	no	yes	1.42	no	1	no	yes	no	no	no	yes	no	no	no	no	no	no	no	no	no	no	no	no	no	no	1	2	0	0	0	3	moderate
67	F	no	no	no	no	no	no	no	no	no	yes	1.5	no		no	yes	no	no	no	no	no	no	no	no	no	no	no	no	no	no	no	no	no	no	1	2	0	0	0	3	moderate
93	F	no	no	no	no	no	no	no	no	no	yes	0.7	no	1	no	yes	no	no	no	yes	no	no	no	no	no	no	no	no	no	no	no	no	no	no	1	2	0	0	0	3	moderate
75	F	no	no	no	no	no	no	no	no	no	yes	1	no	0	yes	yes	no	no	no	yes	no	no	no	no	no	no	no	no	no	no	no	no	no	no	1	2	0	0	0	3	moderate
73	F	no	no	yes	no	no	no	no	no	no	yes	1.26	no	2.1	yes	yes	no	no	no	yes	no	no	no	no	no	no	no	no	no	no	no	no	no	no	1	2	0	0	0	3	moderate
59	F	no	no	no	yes	no	no	no	no	no	yes	5.9	no	1	no	yes	no	no	no	no	no	yes	no	yes	no	no	no	no	no	no	no	no	no	no	1	2	0	0	0	3	moderate
61	F	no	no	no	no	no	no	no	no	no	yes	1.1	no	2	no	yes	no	no	no	no	no	no	no	no	no	no	no	no	no	no	no	no	no	no	1	2	0	0	0	3	moderate
71	F	no	no	no	no	no	no	no	no	no	yes	0.5	no	1	yes	yes	no	no	no	yes	no	no	no	no	no	no	no	no	no	no	no	no	no	no	1	2	0	0	0	3	moderate
87	F	no	no	yes	no	no	no	no	no	no	yes	1.44	no	2.2	no	no	no	no	no	no	no	yes	no	yes	no	no	no	no	no	no	no	no	no	no	1	2	0	0	0	3	moderate
94	F	no	no	yes	no	no	no	no	no	no	yes	1.32	no	1.8	no	yes	no	no	no	no	no	yes	no	yes	no	no	no	no	no	no	no	no	no	no	1	2	0	0	0	3	moderate
83	F	no	no	no	no	no	no	no	no	no	yes	1.5	no	2	no	no	no	no	no	no	no	yes	no	yes	no	no	no	no	no	no	no	no	no	no	1	2	0	0	0	3	moderate
73	F	no	no	yes	no	no	no	no	no	no	yes	4.71	no	1.9	yes	yes	no	no	no	yes	no	no	no	no	no	no	no	no	no	no	no	no	no	no	1	2	0	0	0	3	moderate
80	F	no	no	no	yes	no	no	no	no	no	yes	4.91	no	4	no	yes	no	no	no	no	no	yes	no	yes	no	no	no	no	no	no	no	no	no	no	1	2	0	0	0	3	moderate
79	F	no	no	no	no	no	no	no	no	no	yes	6.7	no	2.7	no	yes	no	no	no	no	no	no	no	no	no	no	no	no	no	no	no	no	no	no	1	2	0	0	0	3	moderate
70	F	no	no	no	no	no	no	no	no	no	yes	22	no	1	yes	yes	no	no	no	no	no	yes	no	yes	no	no	no	no	no	no	no	no	no	no	1	2	0	0	0	3	moderate
51	F	no	no	no	no	no	no	no	no	no	yes	0.9	no	2.4	no	yes	no	no	no	no	no	no	no	no	no	no	no	no	no	no	no	no	no	no	1	2	0	0	0	3	moderate
61	F	no	yes	yes	no	no	no	no	no	no	yes	1.71	no	1	no	no	yes	no	no	yes	no	no	no	no	no	no	no	no	no	no	no	no	no	no	1	2	0	0	0	3	moderate
81	F	no	no	no	no	no	no	no	no	no	yes	1.29	no	2.1	no	yes	no	no	no	yes	no	no	no	no	no	no	no	no	no	no	no	no	no	no	1	2	0	0	0	3	moderate
95	F	no	no	no	no	no	no	no	no	no	yes	2.8	no	1.5	no	yes	no	no	no	no	no	yes	no	yes	no	no	no	no	no	no	no	no	no	no	1	2	0	0	0	3	moderate
91	F	no	no	no	no	no	no	no	no	no	yes	2.6	no	2.1	yes	yes	no	no	no	yes	no	no	no	no	no	no	no	no	no	no	no	no	no	no	1	2	0	0	0	3	moderate
84	F	no	no	no	no	no	no	no	no	no	yes	7.2	no	3.5	no	no	no	no	no	no	no	yes	no	yes	no	no	no	no	no	no	no	no	no	no	1	2	0	0	0	3	moderate
88	F	no	no	no	no	no	no	no	no	no	yes	3.66	no	2.8	yes	yes	no	no	no	yes	no	no	no	no	no	no	no	no	no	no	no	no	no	no	1	2	0	0	0	3	moderate
88	F	no	no	no	no	no	no	no	no	no	yes	4.4	no	0	no	yes	no	no	no	yes	no	no	no	no	no	no	no	no	no	no	no	no	no	no	1	2	0	0	0	3	moderate
84	F	no	no	yes	no	no	no	no	no	no	yes	0.56	no		no	yes	no	no	no	no	no	yes	no	yes	no	no	no	no	no	no	no	no	no	no	1	2	0	0	0	3	moderate
69	F	no	no	yes	yes	no	no	no	no	no	yes	11.96	no	4.1	no	yes	no	no	no	no	no	yes	no	yes	no	no	no	no	no	no	no	no	no	no	1	2	0	0	0	3	moderate
78	F	no	no	yes	no	no	no	no	no	no	yes	0.72	no		no	no	no	no	no	no	no	yes	no	yes	no	no	no	no	no	no	no	no	no	no	1	2	0	0	0	3	moderate
84	F	no	no	yes	no	no	no	no	no	no	yes	6.85	no	2.6	yes	yes	no	no	no	no	no	yes	no	yes	no	no	no	no	no	no	no	no	no	no	1	2	0	0	0	3	moderate
95	F	no	no	yes	no	no	no	no	no	no	yes	3.46	no	2	yes	yes	no	no	no	no	no	yes	no	yes	no	no	no	no	no	no	no	no	no	no	1	2	0	0	0	3	moderate
91	F	no	no	no	no	no	no	no	no	no	yes	5.1	no	1	no	yes	no	no	no	no	no	no	no	no	no	no	no	no	no	no	no	no	no	no	1	2	0	0	0	3	moderate
91	F	no	no	yes	yes	no	no	no	no	no	yes	2.4	no	5.4	no	yes	no	no	no	no	no	yes	no	no	yes	no	no	no	no	no	yes	yes	no	no	1	2	0	0	0	3	moderate
90	F	no	no	yes	no	no	no	no	no	no	yes	0.7	no	3.8	yes	yes	no	no	no	yes	no	yes	no	yes	no	no	no	no	no	no	yes	yes	no	no	1	2	0	0	0	3	moderate
50	F	no	no	no	no	no	no	no	no	no	yes	10.1	no	1.1	yes	yes	no	no	no	no	no	yes	no	yes	no	no	no	no	no	no	yes	no	yes	no	1	2	0	0	0	3	moderate
82	F	no	no	no	yes	no	no	no	no	no	yes	16.7	no	3.6	no	yes	no	no	no	no	no	yes	no	no	yes	no	no	no	no	no	yes	yes	no	no	1	2	0	0	0	3	moderate
83	F	no	no	no	yes	no	no	no	no	no	yes	3.6	no	9.3	no	yes	no	no	no	no	no	no	no	no	yes	yes	no	no	no	no	yes	yes	no	no	1	2	0	0	0	3	moderate
83	F	no	no	no	no	no	no	no	no	no	yes	4.8	no	2.1	no	yes	no	no	no	yes	no	no	no	no	no	no	no	no	no	no	yes	yes	no	no	1	2	0	0	0	3	moderate
87	F	no	no	yes	no	no	no	no	no	no	yes	0.79	no	2	yes	yes	yes	no	no	yes	no	no	no	no	no	no	no	no	no	no	no	no	no	no	1	2	0	0	0	3	moderate
63	F	no	no	yes	no	no	no	no	no	no	yes	0.5	no	1	yes	yes	no	no	no	yes	no	no	no	no	no	no	no	no	no	no	no	no	no	no	1	2	0	0	0	3	moderate
75	F	no	no	yes	no	no	no	no	no	no	yes	1.28	no	2	no	yes	no	no	no	no	no	no	no	no	no	no	no	no	no	no	no	no	no	no	1	2	0	0	0	3	moderate
79	F	no	no	yes	no	no	no	no	no	no	yes	1.47	no	3	yes	yes	no	no	no	yes	no	no	no	no	no	no	no	no	no	no	no	no	no	no	1	2	0	0	0	3	moderate
48	F	no	yes	no	no	no	no	no	yes	no	yes	2.3	no	1	yes	yes	no	no	no	yes	no	no	no	no	no	no	no	no	no	no	no	no	no	no	1	2	0	0	0	3	moderate
85	F	no	no	yes	no	no	no	no	yes	no	yes	0.75	no		no	yes	no	no	no	no	no	yes	no	yes	no	no	no	no	no	no	no	no	no	no	1	2	0	0	0	3	moderate
86	F	no	yes	no	no	no	no	no	yes	no	yes	4.1	no	5.5	yes	yes	no	no	no	yes	no	no	no	no	no	no	no	no	no	no	yes	yes	no	no	1	2	0	0	0	3	moderate
86	F	no	no	yes	no	no	no	no	no	no	yes	3.4	no	1	yes	yes	no	no	yes	yes	no	no	no	no	no	no	no	no	no	no	no	no	no	no	1	2	0	0	0	3	moderate
81	F	no	no	yes	no	no	no	no	no	no	yes	2.2	no	1	yes	yes	no	no	yes	yes	no	no	no	no	no	no	no	no	no	no	no	no	no	no	1	2	0	0	0	3	moderate
81	F	no	no	yes	no	no	no	no	no	no	yes	1.9	no	3.3	yes	yes	no	no	yes	yes	no	no	no	no	no	no	no	no	no	no	no	no	no	no	1	2	0	0	0	3	moderate
81	F	no	no	no	no	no	no	no	no	no	yes	1.1	no	1.9	no	yes	no	no	yes	yes	no	yes	no	yes	no	no	no	no	no	no	no	no	no	no	1	2	0	0	0	3	moderate
87	F	no	no	yes	no	no	no	no	no	no	yes	0.49	no		yes	yes	no	no	yes	yes	no	no	no	no	no	no	no	no	no	no	no	no	no	no	1	2	0	0	0	3	moderate
74	F	no	no	yes	no	no	no	no	no	no	yes	0.81	no	1.6	yes	yes	no	no	yes	yes	no	no	no	no	no	no	no	no	no	no	no	no	no	no	1	2	0	0	0	3	moderate
72	F	no	no	yes	no	no	no	no	no	no	yes	0.82	no	3	yes	yes	no	no	yes	yes	no	no	no	no	no	no	no	no	no	no	no	no	no	no	1	2	0	0	0	3	moderate
86	F	no	no	no	no	no	no	no	no	no	yes	0.7	yes	0	no	yes	no	no	no	yes	no	no	no	no	no	no	yes	yes	yes	yes	no	no	no	no	1	2	-2	2	0	3	moderate
67	F	no	no	yes	no	no	no	no	yes	no	yes	0.7	yes	1.7	no	yes	no	no	no	no	no	yes	no	no	no	no	yes	yes	yes	yes	no	no	no	no	1	2	-2	2	0	3	moderate
89	F	no	no	yes	no	no	B-I	yes	no	no	yes	1.1	no		no	yes	no	no	yes	yes	no	no	no	no	no	no	no	no	no	no	no	no	no	no	1	2	0	0	0	3	moderate
66	F	no	no	no	yes	no	B-I	yes	no	no	yes	16	no	13.6	no	yes	no	no	no	no	no	yes	no	yes	no	no	no	no	no	no	no	no	no	no	1	2	0	0	0	3	moderate
76	F	no	no	yes	no	no	R-Y	yes	no	no	yes	1.3	no	1	yes	yes	no	no	yes	yes	no	no	no	no	no	no	no	no	no	no	no	no	no	no	1	2	0	0	0	3	moderate
74	F	no	no	yes	no	no	R-Y	yes	yes	no	yes	0.9	no		no	yes	no	no	yes	yes	no	no	no	no	no	no	no	no	no	no	no	no	no	no	1	2	0	0	0	3	moderate
88	F	no	no	no	no	no	R-Y	yes	no	no	yes	2.6	no		no	no	no	no	no	no	no	yes	yes	no	yes	no	no	no	no	no	no	no	no	no	1	2	0	0	0	3	moderate
88	F	no	no	no	no	no	R-Y	yes	no	no	yes	3.1	no		no	no	no	no	no	no	no	no	no	no	no	no	no	no	no	no	no	no	no	no	1	2	0	0	0	3	moderate
85	F	no	no	yes	no	no	R-Y	yes	no	no	yes	1.5	no	2.2	no	no	no	no	no	no	no	yes	no	yes	no	no	no	no	no	no	no	no	no	no	1	2	0	0	0	3	moderate
73	F	no	no	yes	no	no	R-Y	yes	no	no	yes	3.1	no	1.2	no	yes	no	no	no	yes	no	no	no	no	no	no	no	no	no	no	yes	yes	no	no	1	2	0	0	0	3	moderate
73	F	no	no	yes	no	no	R-Y	yes	no	no	yes	0.8	no	1.9	no	yes	no	no	yes	yes	no	no	no	no	no	no	no	no	no	no	no	no	no	no	1	2	0	0	0	3	moderate
78	F	no	no	yes	no	no	no	no	no	no	yes	1	no	2.1	no	yes	no	yes	no	yes	no	no	no	no	no	no	no	no	no	no	no	no	no	no	1	2	0	0	0	3	moderate
72	F	no	no	yes	no	no	no	no	no	no	yes	2.8	no	1	yes	yes	no	yes	no	yes	no	no	no	no	no	no	no	no	no	no	no	no	no	no	1	2	0	0	0	3	moderate
87	F	no	no	no	no	no	no	no	no	no	yes	1	no	2.7	yes	yes	no	yes	no	yes	no	no	no	no	no	no	no	no	no	no	no	no	no	no	1	2	0	0	0	3	moderate
82	F	no	no	no	no	no	no	no	no	no	yes	1.9	no	1.5	no	yes	no	yes	no	no	no	yes	no	yes	no	no	no	no	no	no	no	no	no	no	1	2	0	0	0	3	moderate
82	F	no	no	yes	no	no	no	no	no	no	yes	1.2	no	1.7	yes	yes	no	yes	no	yes	no	no	no	no	no	no	no	no	no	no	no	no	no	no	1	2	0	0	0	3	moderate
91	F	no	no	no	no	no	no	no	no	no	yes	0.6	no	0	no	no	no	yes	no	yes	no	no	no	no	no	no	no	no	no	no	no	no	no	no	1	2	0	0	0	3	moderate
74	F	no	no	no	no	no	no	no	no	no	yes	1.85	no	1	yes	yes	no	yes	no	yes	no	no	no	no	no	no	no	no	no	no	no	no	no	no	1	2	0	0	0	3	moderate
89	F	no	no	yes	no	no	R-Y	yes	no	no	yes	1.22	no	1.9	no	no	no	yes	no	yes	no	no	no	no	no	no	no	no	no	no	no	no	no	no	1	2	0	0	0	3	moderate
81	F	no	no	yes	no	no	R-Y	yes	no	no	yes	0.6	no	1.3	no	yes	no	yes	no	yes	no	no	no	no	no	no	no	no	no	no	no	no	no	no	1	2	0	0	0	3	moderate
78	M	no	no	yes	no	yes	no	no	no	no	no	0.88	no		no	no	no	no	no	no	no	no	no	no	no	no	no	yes	no	no	no	no	no	no	0	0	0	2	2	4	high
69	M	no	no	yes	no	no	no	no	no	no	yes	3.7	no	3.3	no	yes	no	no	no	no	no	yes	no	yes	no	no	yes	yes	no	no	no	no	no	no	0	2	0	2	0	4	high
68	M	no	no	yes	yes	no	no	no	no	no	yes	14.46	no	5	no	no	no	no	no	no	no	yes	no	no	no	no	yes	yes	no	no	no	no	no	no	0	2	0	2	0	4	high
67	M	no	no	yes	no	no	no	no	no	no	yes	9.7	no	1.9	no	yes	no	no	no	no	no	yes	no	yes	no	no	yes	yes	no	no	no	no	no	no	0	2	0	2	0	4	high
29	M	no	no	no	no	no	no	no	no	no	yes	15.4	no	0.5	no	yes	no	no	no	no	no	yes	no	yes	no	no	yes	yes	no	no	no	no	no	no	0	2	0	2	0	4	high
66	M	no	no	yes	yes	no	no	no	no	no	yes	5.5	no	6.6	no	yes	no	no	no	no	no	yes	no	yes	no	no	yes	yes	no	no	no	no	no	no	0	2	0	2	0	4	high
72	M	no	no	no	no	no	no	no	no	no	yes	6.7	no	1	no	yes	no	no	no	no	no	yes	no	yes	no	no	yes	yes	no	no	no	no	no	no	0	2	0	2	0	4	high
46	M	no	no	yes	no	no	no	no	no	no	yes	1.1	no	1.6	no	yes	no	no	no	no	no	yes	no	yes	no	no	yes	yes	no	no	no	no	no	no	0	2	0	2	0	4	high
77	M	no	no	yes	no	no	no	no	no	no	yes	1	no	3.1	no	yes	no	no	no	no	no	no	no	no	no	no	yes	yes	no	no	no	no	no	no	0	2	0	2	0	4	high
56	M	no	no	yes	no	no	no	no	no	no	yes	1.04	no	2	no	yes	no	no	no	yes	no	no	no	no	no	no	yes	yes	no	no	no	no	no	no	0	2	0	2	0	4	high
73	M	no	no	yes	no	no	no	no	no	no	yes	1.13	no	2	yes	yes	no	no	no	yes	no	no	no	no	no	no	yes	yes	no	no	no	no	no	no	0	2	0	2	0	4	high
81	M	no	no	yes	yes	no	no	no	no	no	yes	17.5	no	12.3	no	yes	no	no	no	no	no	yes	no	yes	no	no	yes	yes	no	no	no	no	no	no	0	2	0	2	0	4	high
81	M	no	no	yes	yes	no	no	no	no	no	yes	0.95	no	8.3	no	no	no	no	no	no	no	yes	no	no	yes	yes	yes	yes	no	no	no	no	no	no	0	2	0	2	0	4	high
83	M	no	no	no	no	no	no	no	no	no	yes	10.53	no	1.5	no	yes	no	no	no	no	no	yes	no	yes	no	no	yes	yes	no	no	no	no	no	no	0	2	0	2	0	4	high
63	M	no	no	no	no	no	no	no	no	no	yes	7.92	no	3.4	yes	yes	no	no	no	no	no	yes	no	yes	no	no	yes	yes	no	no	no	no	no	no	0	2	0	2	0	4	high
52	M	no	no	yes	no	no	no	no	no	no	yes	5.63	no	2	no	yes	no	no	no	no	no	yes	no	no	no	no	yes	yes	no	no	no	no	no	no	0	2	0	2	0	4	high
89	M	no	no	no	no	no	no	no	no	no	yes	5.4	no	0	no	yes	no	no	no	yes	no	no	no	no	no	no	yes	yes	no	no	no	no	no	no	0	2	0	2	0	4	high
82	M	no	no	yes	no	no	no	no	no	no	yes	0.69	no	3	no	yes	no	no	no	yes	no	no	no	no	no	no	yes	yes	no	no	no	no	no	no	0	2	0	2	0	4	high
46	M	no	no	yes	yes	no	no	no	no	no	yes	2.3	no	1	no	yes	no	no	no	no	no	yes	no	no	yes	no	yes	yes	no	no	no	no	no	no	0	2	0	2	0	4	high
69	M	no	no	yes	no	no	no	no	no	no	yes	21.1	no	2.3	no	yes	no	no	no	no	no	yes	no	yes	no	no	yes	yes	no	no	no	no	no	no	0	2	0	2	0	4	high
83	M	no	no	yes	yes	no	no	no	no	no	yes	6.1	no	7.2	no	yes	yes	no	no	no	no	yes	no	yes	no	no	yes	yes	no	no	no	no	no	no	0	2	0	2	0	4	high
84	M	no	no	yes	no	no	no	no	no	no	yes	2.29	no	2	no	yes	no	no	no	yes	no	no	no	no	no	no	yes	yes	no	no	no	no	no	no	0	2	0	2	0	4	high
88	M	no	no	no	no	no	no	no	no	no	yes	2.3	no	2.5	no	yes	no	no	no	yes	no	no	no	no	no	no	yes	yes	no	no	no	no	no	no	0	2	0	2	0	4	high
85	M	yes	no	no	no	no	no	no	no	no	yes	3.5	no	1.6	no	yes	no	no	no	no	no	yes	no	yes	no	no	yes	yes	no	no	no	no	no	no	0	2	0	2	0	4	high
48	M	no	no	yes	no	no	no	no	no	no	yes	8.25	no	5	no	yes	no	no	no	no	no	yes	no	yes	no	no	yes	yes	no	no	yes	yes	no	no	0	2	0	2	0	4	high
72	M	no	no	yes	yes	no	no	no	no	no	yes	14.37	no	4	no	no	no	no	no	no	no	no	no	no	no	no	yes	yes	no	no	yes	yes	no	no	0	2	0	2	0	4	high
74	M	no	no	no	no	no	no	no	no	no	yes	3.3	no	1	no	yes	no	no	no	no	no	yes	no	no	yes	no	yes	yes	no	no	yes	yes	no	no	0	2	0	2	0	4	high
90	M	no	no	yes	no	no	no	no	no	no	yes	1.43	no	2	no	yes	no	no	no	no	no	no	no	no	no	no	yes	yes	no	no	no	no	no	no	0	2	0	2	0	4	high
85	M	no	no	yes	no	no	no	no	no	no	yes	0.8	no	1	no	yes	no	no	no	yes	no	no	no	no	no	no	yes	yes	yes	yes	no	no	no	no	0	2	0	2	0	4	high
79	M	no	no	yes	yes	no	no	no	no	no	yes	15.9	no	6.4	no	yes	no	no	no	no	no	yes	no	no	yes	no	yes	yes	yes	yes	no	no	no	no	0	2	0	2	0	4	high
54	M	no	no	no	no	no	no	no	no	no	yes	0.6	no	0.5	no	no	no	no	no	no	no	yes	no	yes	no	no	yes	yes	yes	yes	no	no	no	no	0	2	0	2	0	4	high
72	M	no	no	no	no	no	no	no	no	no	yes	4.8	no	3.1	yes	yes	no	no	no	no	no	no	no	no	no	no	yes	yes	yes	yes	no	no	no	no	0	2	0	2	0	4	high
89	M	no	no	yes	no	no	no	no	no	no	yes	4.9	no	5.1	no	yes	no	no	no	no	no	yes	no	yes	no	no	yes	yes	yes	yes	no	no	no	no	0	2	0	2	0	4	high
75	M	no	no	yes	no	no	no	no	no	no	yes	7.5	no	8.5	yes	yes	yes	no	no	no	no	no	no	no	no	no	yes	yes	yes	yes	no	no	no	no	0	2	0	2	0	4	high
77	M	no	no	yes	yes	no	no	no	no	no	yes	0.94	no	5.9	no	no	no	no	no	no	no	no	no	no	no	no	yes	yes	yes	yes	no	no	no	no	0	2	0	2	0	4	high
76	M	no	no	yes	no	no	no	no	no	no	yes	8.7	no	2	no	yes	no	no	no	no	no	yes	no	yes	no	no	yes	yes	yes	yes	no	no	no	no	0	2	0	2	0	4	high
76	M	no	no	yes	no	no	no	no	no	no	yes	1.3	no	2.1	no	yes	no	no	no	no	no	yes	no	yes	no	no	yes	yes	yes	yes	no	no	no	no	0	2	0	2	0	4	high
72	M	no	no	yes	no	no	no	no	no	no	yes	5	no	1.8	no	yes	no	no	no	no	no	yes	no	yes	no	no	yes	yes	yes	yes	no	no	no	no	0	2	0	2	0	4	high
77	M	no	no	yes	no	no	no	no	no	no	yes	1.1	no	1.2	yes	yes	no	no	no	no	no	yes	no	no	no	no	yes	yes	yes	yes	no	no	no	no	0	2	0	2	0	4	high
22	M	no	no	yes	no	no	no	no	no	no	yes	0.8	no	0.2	no	yes	no	no	no	no	no	yes	no	yes	no	no	yes	yes	yes	yes	no	no	no	no	0	2	0	2	0	4	high
58	M	no	no	yes	no	no	no	no	no	no	yes	2.4	no	7.5	no	yes	no	no	no	no	no	yes	no	no	yes	yes	yes	yes	yes	yes	no	no	no	no	0	2	0	2	0	4	high
88	M	no	no	yes	no	no	no	no	no	no	yes	1.9	no	2.7	no	yes	no	no	no	no	no	yes	no	no	no	no	yes	yes	yes	yes	no	no	no	no	0	2	0	2	0	4	high
76	M	no	no	yes	no	no	no	no	no	no	yes	4.4	no	1.5	yes	yes	no	no	no	yes	no	no	no	no	no	no	yes	yes	yes	yes	no	no	no	no	0	2	0	2	0	4	high
67	M	no	no	yes	no	no	no	no	no	no	yes	9	no	1.1	no	no	no	no	no	no	no	yes	no	no	yes	no	yes	yes	yes	yes	no	no	no	no	0	2	0	2	0	4	high
55	M	no	no	yes	no	no	no	no	no	no	yes	0.5	no		no	yes	no	no	no	yes	no	no	no	no	no	no	yes	yes	yes	yes	no	no	no	no	0	2	0	2	0	4	high
88	M	no	no	yes	no	no	no	no	no	no	yes	12.7	no	2.5	yes	yes	no	no	no	no	no	yes	no	yes	no	no	yes	yes	yes	yes	no	no	no	no	0	2	0	2	0	4	high
72	M	no	no	yes	no	no	no	no	no	no	yes	4.3	no	8	no	no	no	no	no	no	no	yes	no	yes	no	no	yes	yes	yes	yes	no	no	no	no	0	2	0	2	0	4	high
88	M	no	no	yes	no	no	no	no	no	no	yes	3.4	no	1.6	no	yes	yes	no	no	no	no	yes	no	yes	no	no	yes	yes	yes	yes	no	no	no	no	0	2	0	2	0	4	high
74	M	no	no	yes	no	no	no	no	no	no	yes	1.3	no	1.7	no	yes	no	no	no	yes	no	no	no	no	no	no	yes	yes	yes	yes	no	no	no	no	0	2	0	2	0	4	high
73	M	no	no	yes	no	no	no	no	no	no	yes	0.9	no	2.2	no	no	no	no	no	no	yes	yes	no	yes	no	no	yes	yes	yes	yes	no	no	no	no	0	2	0	2	0	4	high
89	M	no	no	no	no	no	no	no	no	no	yes	6.1	no	1.2	no	no	no	no	no	no	no	yes	no	yes	no	no	yes	yes	yes	yes	no	no	no	no	0	2	0	2	0	4	high
75	M	no	no	no	no	no	no	no	no	no	yes	12.8	no	2.8	no	yes	no	no	no	no	no	yes	no	yes	no	no	yes	yes	yes	yes	no	no	no	no	0	2	0	2	0	4	high
66	M	no	no	yes	no	no	no	no	no	no	yes	6.02	no	1.8	no	no	no	no	no	no	no	yes	no	yes	no	no	yes	yes	yes	yes	no	no	no	no	0	2	0	2	0	4	high
71	M	no	no	yes	no	no	no	no	no	no	yes	0.74	no	2.3	no	yes	no	no	no	yes	no	no	no	no	no	no	yes	yes	yes	yes	no	no	no	no	0	2	0	2	0	4	high
90	M	no	no	no	no	no	no	no	no	no	yes	5.31	no	2.5	no	no	no	no	no	no	no	yes	no	yes	no	no	yes	yes	yes	yes	no	no	no	no	0	2	0	2	0	4	high
88	M	no	no	no	no	no	no	no	no	no	yes	5	no	1.5	yes	yes	yes	no	no	yes	no	no	no	no	no	no	yes	yes	yes	yes	no	no	no	no	0	2	0	2	0	4	high
76	M	no	no	yes	no	no	no	no	no	no	yes	0.8	no	1	no	yes	no	no	no	no	no	yes	no	no	no	no	yes	yes	yes	yes	yes	yes	no	no	0	2	0	2	0	4	high
69	M	no	no	yes	no	no	no	no	no	no	yes	0.9	no	2	no	no	no	no	no	no	yes	yes	no	yes	no	no	yes	yes	yes	yes	yes	yes	no	no	0	2	0	2	0	4	high
78	M	no	no	yes	no	no	no	no	no	no	yes		no		yes	no	no	no	no	no	yes	yes	no	yes	no	no	yes	yes	yes	yes	yes	yes	no	no	0	2	0	2	0	4	high
42	M	no	no	yes	no	no	no	no	no	no	yes	1.8	no	3	yes	yes	no	no	no	yes	no	no	no	no	no	no	yes	yes	yes	yes	yes	yes	no	no	0	2	0	2	0	4	high
82	M	no	no	yes	no	no	no	no	no	no	yes	5.8	no	2	no	yes	no	no	no	no	no	yes	no	yes	no	no	yes	yes	yes	yes	yes	no	yes	no	0	2	0	2	0	4	high
71	M	no	no	yes	no	no	no	no	no	no	yes	1.1	no	3	yes	yes	yes	no	no	no	no	yes	no	no	yes	yes	yes	yes	yes	yes	yes	no	no	yes	0	2	0	2	0	4	high
84	M	no	yes	no	no	no	no	no	yes	no	yes	2.6	no	1.5	no	yes	no	no	no	no	no	yes	no	yes	no	no	yes	yes	yes	yes	no	no	no	no	0	2	0	2	0	4	high
89	M	no	no	yes	no	no	no	no	yes	no	yes	2.46	no		no	no	no	no	no	no	no	no	no	no	no	no	yes	yes	yes	yes	no	no	no	no	0	2	0	2	0	4	high
62	M	no	no	yes	yes	no	no	no	no	no	yes	0.98	no	3.1	no	no	no	no	no	no	no	no	no	no	no	no	no	yes	no	no	no	no	no	no	0	2	0	2	0	4	high
83	M	no	no	yes	no	no	no	no	no	no	yes	31.9	no	2	no	yes	yes	no	no	no	no	yes	no	yes	no	no	no	yes	yes	no	no	no	no	no	0	2	0	2	0	4	high
73	M	no	no	yes	yes	no	no	no	no	no	yes	1.3	no	4.9	no	no	no	no	no	no	no	no	no	no	no	no	no	yes	yes	no	no	no	no	no	0	2	0	2	0	4	high
65	M	no	no	yes	yes	no	no	no	no	no	yes	1.2	no	5.6	no	no	no	no	no	no	no	no	no	no	no	no	no	yes	yes	no	no	no	no	no	0	2	0	2	0	4	high
43	M	no	no	yes	no	no	no	no	no	no	yes	0.8	no	1	no	no	no	no	no	no	no	no	no	no	no	no	no	yes	yes	no	no	no	no	no	0	2	0	2	0	4	high
67	M	no	no	yes	yes	no	no	no	no	no	yes	0.5	no	4.6	no	no	no	no	no	no	no	no	no	no	no	no	no	yes	yes	no	no	no	no	no	0	2	0	2	0	4	high
68	M	no	no	yes	yes	no	no	no	no	no	yes	17.1	no	4.5	no	yes	no	no	no	no	no	yes	no	yes	no	no	no	yes	yes	no	no	no	no	no	0	2	0	2	0	4	high
65	M	no	no	no	yes	no	no	no	no	no	yes	0.8	no	11.66	no	no	no	no	no	no	no	no	no	no	no	no	no	yes	yes	no	no	no	no	no	0	2	0	2	0	4	high
77	M	no	no	no	yes	no	no	no	no	no	yes	1.4	no		no	no	no	no	no	no	no	no	no	no	no	no	no	yes	yes	no	yes	yes	no	no	0	2	0	2	0	4	high
78	M	no	no	yes	no	no	no	no	yes	no	yes	1.1	no	0.9	no	no	no	no	no	no	no	no	no	no	no	no	no	yes	yes	no	no	no	no	no	0	2	0	2	0	4	high
18	M	no	no	yes	no	no	no	no	yes	no	yes	0.8	no	1.9	no	no	no	no	no	no	no	no	no	no	no	no	no	yes	yes	no	no	no	no	no	0	2	0	2	0	4	high
66	M	no	no	yes	no	no	no	no	yes	no	yes	0.47	no	7.1	no	yes	yes	no	no	no	no	no	no	no	no	no	no	yes	yes	no	yes	yes	no	no	0	2	0	2	0	4	high
47	M	no	yes	yes	no	no	no	no	yes	no	yes	1.15	no	2	no	no	no	no	no	no	no	no	no	no	no	no	no	yes	yes	no	yes	yes	no	no	0	2	0	2	0	4	high
77	M	no	no	yes	no	no	B-I	yes	no	no	yes	0.4	no	5	no	yes	yes	no	no	no	no	yes	no	yes	no	no	yes	yes	no	no	yes	no	no	yes	0	2	0	2	0	4	high
70	M	no	no	yes	no	no	B-I	yes	no	no	yes	28	no	1.5	no	yes	no	no	no	no	no	yes	no	yes	no	no	no	yes	yes	no	yes	yes	no	no	0	2	0	2	0	4	high
90	M	no	no	yes	no	no	B-I	yes	no	no	yes	1.8	no	1.1	yes	yes	no	no	no	no	no	yes	no	no	yes	no	yes	yes	yes	yes	no	no	no	no	0	2	0	2	0	4	high
80	M	no	no	yes	no	no	B-I	yes	no	no	yes	1	no	1.8	no	no	no	no	no	no	no	no	no	no	no	no	no	yes	yes	no	no	no	no	no	0	2	0	2	0	4	high
78	M	no	no	yes	no	no	R-Y	yes	no	no	yes	0.2	no	4.1	no	no	no	no	no	no	no	no	no	no	no	no	no	yes	yes	no	no	no	no	no	0	2	0	2	0	4	high
65	M	no	no	yes	no	no	R-Y	yes	no	no	yes	0.6	no	3.2	no	yes	no	no	yes	yes	no	no	no	no	no	no	yes	yes	no	no	no	no	no	no	0	2	0	2	0	4	high
82	M	no	no	no	no	no	R-Y	yes	no	no	yes	0.8	no	2.9	no	no	no	no	no	no	no	no	no	no	no	no	yes	yes	no	no	no	no	no	no	0	2	0	2	0	4	high
77	F	no	no	yes	no	no	no	no	no	no	yes	3.98	no	2.4	yes	yes	no	no	no	yes	no	no	no	no	no	no	yes	yes	no	no	no	no	no	no	1	2	0	2	0	5	high
71	F	no	no	no	no	no	no	no	no	no	yes	0.6	no	0.5	no	yes	no	no	no	no	no	yes	no	yes	no	no	yes	yes	no	no	no	no	no	no	1	2	0	2	0	5	high
92	F	no	no	yes	no	no	no	no	no	no	yes	3.3	no	1.4	no	yes	no	no	no	no	no	yes	no	yes	no	no	yes	yes	no	no	no	no	no	no	1	2	0	2	0	5	high
74	F	no	no	yes	no	no	no	no	no	no	yes	12.6	no	1	no	yes	no	no	no	no	no	yes	no	no	yes	no	yes	yes	no	no	no	no	no	no	1	2	0	2	0	5	high
69	F	no	no	yes	no	no	no	no	no	no	yes	0.7	no	1.5	no	yes	no	no	no	yes	no	no	no	no	no	no	yes	yes	no	no	no	no	no	no	1	2	0	2	0	5	high
82	F	no	no	no	no	no	no	no	no	no	yes	1.5	no	1.6	yes	yes	no	no	no	yes	no	no	no	no	no	no	yes	yes	no	no	no	no	no	no	1	2	0	2	0	5	high
92	F	no	yes	no	no	no	no	no	no	no	yes	11.9	no	2.4	no	yes	no	no	no	no	no	yes	no	yes	no	no	yes	yes	no	no	no	no	no	no	1	2	0	2	0	5	high
72	F	no	no	yes	yes	no	no	no	no	no	yes	16	no	10.4	no	yes	no	no	no	no	no	yes	no	yes	no	no	yes	yes	no	no	no	no	no	no	1	2	0	2	0	5	high
73	F	no	no	yes	yes	no	no	no	no	no	yes	2.9	no	6.5	no	no	no	no	no	no	no	yes	no	yes	no	no	yes	yes	no	no	no	no	no	no	1	2	0	2	0	5	high
82	F	no	no	yes	no	no	no	no	no	no	yes	6	no	3.6	no	yes	no	no	no	yes	no	no	no	no	no	no	yes	yes	no	no	no	no	no	no	1	2	0	2	0	5	high
73	F	no	no	yes	yes	no	no	no	no	no	yes	2.5	no	9.8	no	no	no	no	no	no	no	yes	no	yes	no	no	yes	yes	no	no	no	no	no	no	1	2	0	2	0	5	high
23	F	no	no	yes	no	no	no	no	no	no	yes	0.59	no	1	no	yes	no	no	no	no	no	no	no	no	no	no	yes	yes	no	no	no	no	no	no	1	2	0	2	0	5	high
64	F	no	no	yes	yes	no	no	no	no	no	yes	6.62	no	2	no	no	no	no	no	no	no	yes	no	yes	no	no	yes	yes	no	no	yes	yes	no	no	1	2	0	2	0	5	high
85	F	no	no	yes	no	no	no	no	no	no	yes	0.83	no	4.1	yes	no	no	no	no	no	no	yes	no	no	no	no	yes	yes	no	no	yes	yes	no	no	1	2	0	2	0	5	high
57	F	no	no	yes	no	no	no	no	no	no	yes	0.8	no	1.4	no	yes	no	no	no	no	no	no	no	no	no	no	yes	yes	no	no	yes	no	yes	no	1	2	0	2	0	5	high
92	F	no	no	yes	no	no	no	no	no	no	yes	0.79	no		yes	yes	no	no	no	no	no	yes	no	yes	no	no	yes	yes	no	no	yes	yes	no	no	1	2	0	2	0	5	high
84	F	no	no	yes	no	no	no	no	no	no	yes	1.12	no	1	no	yes	no	no	no	no	no	no	no	no	no	no	yes	yes	no	no	no	no	no	no	1	2	0	2	0	5	high
61	F	no	no	no	yes	no	no	no	no	no	yes	7.86	no	4.8	yes	yes	no	no	no	no	no	yes	no	no	no	yes	yes	yes	no	no	no	no	no	no	1	2	0	2	0	5	high
72	F	no	no	yes	no	no	no	no	no	no	yes	1.78	no	3	no	no	no	no	no	no	no	no	no	no	no	no	yes	yes	no	no	no	no	no	no	1	2	0	2	0	5	high
93	F	no	no	yes	no	no	no	no	no	no	yes	0.9	no	3.8	no	yes	no	no	no	no	no	yes	no	yes	no	no	yes	yes	no	no	no	no	no	no	1	2	0	2	0	5	high
73	F	yes	yes	yes	no	no	no	no	no	no	yes	5.61	no		yes	yes	no	no	no	no	no	yes	no	yes	no	no	yes	yes	no	no	no	no	no	no	1	2	0	2	0	5	high
68	F	no	no	yes	yes	no	no	no	no	no	yes	13.8	no	7	no	yes	no	no	no	no	no	yes	no	yes	no	no	yes	yes	no	no	no	no	no	no	1	2	0	2	0	5	high
75	F	no	no	no	yes	no	no	no	no	no	yes	11.8	no	6.84	no	no	yes	no	no	no	no	no	no	no	no	no	yes	yes	no	no	no	no	no	no	1	2	0	2	0	5	high
85	F	no	no	yes	no	no	no	no	no	no	yes	5.37	no	1.4	no	yes	no	no	no	no	no	no	no	no	no	no	yes	yes	no	no	no	no	no	no	1	2	0	2	0	5	high
53	F	no	no	yes	no	no	no	no	no	no	yes	0.97	no	1.4	no	yes	no	no	no	yes	no	no	no	no	no	no	yes	yes	no	no	yes	yes	no	no	1	2	0	2	0	5	high
82	F	no	no	yes	no	no	no	no	yes	no	yes	1.12	no	3	yes	yes	no	no	no	yes	no	no	no	no	no	no	yes	yes	no	no	no	no	no	no	1	2	0	2	0	5	high
97	F	no	no	yes	no	no	no	no	no	no	yes	0.9	no	1.1	yes	yes	no	no	yes	yes	no	no	no	no	no	no	yes	yes	no	no	no	no	no	no	1	2	0	2	0	5	high
90	F	no	no	no	no	no	no	no	no	no	yes	0.8	no	0	no	yes	no	no	yes	yes	no	no	no	no	no	no	yes	yes	no	no	no	no	no	no	1	2	0	2	0	5	high
72	F	no	no	yes	no	no	no	no	no	no	yes	0.9	no	1.4	yes	yes	no	no	no	yes	no	no	no	no	no	no	yes	yes	yes	yes	no	no	no	no	1	2	0	2	0	5	high
83	F	no	no	no	no	no	no	no	no	no	yes	0.7	no	2.2	yes	yes	no	no	no	no	no	yes	yes	yes	no	no	yes	yes	yes	yes	no	no	no	no	1	2	0	2	0	5	high
92	F	no	no	no	no	no	no	no	no	no	yes	1.92	no	1.3	no	yes	no	no	no	no	no	yes	no	yes	no	no	yes	yes	yes	yes	no	no	no	no	1	2	0	2	0	5	high
67	F	no	no	yes	no	no	no	no	no	no	yes	0.66	no	5	no	yes	no	no	no	yes	no	yes	no	yes	no	no	yes	yes	yes	yes	no	no	no	no	1	2	0	2	0	5	high
51	F	no	no	no	no	no	no	no	no	no	yes	0.5	no	2.7	no	no	no	no	no	no	yes	yes	no	yes	no	no	yes	yes	yes	yes	no	no	no	no	1	2	0	2	0	5	high
86	F	no	no	yes	no	no	no	no	no	no	yes	6.63	no	2.1	yes	yes	no	no	no	no	no	yes	no	yes	no	no	yes	yes	yes	yes	yes	no	yes	no	1	2	0	2	0	5	high
92	F	no	no	yes	no	no	no	no	no	no	yes	2.55	no		yes	no	no	no	no	no	no	no	no	no	no	no	yes	yes	yes	yes	yes	yes	no	no	1	2	0	2	0	5	high
70	F	no	no	yes	yes	no	no	no	no	no	yes	7.6	no	1.6	no	yes	yes	no	no	no	no	yes	no	yes	no	no	yes	yes	yes	yes	no	no	no	no	1	2	0	2	0	5	high
80	F	no	no	yes	yes	no	no	no	no	no	yes	0.7	no	3	yes	yes	no	no	no	no	no	yes	no	yes	no	no	yes	yes	yes	yes	no	no	no	no	1	2	0	2	0	5	high
94	F	no	no	yes	no	no	no	no	no	no	yes	2.4	no	1.8	yes	yes	no	no	no	no	no	yes	no	yes	no	no	yes	yes	yes	yes	no	no	no	no	1	2	0	2	0	5	high
70	F	no	no	yes	no	no	no	no	no	no	yes	5.31	no	3.9	no	no	no	no	no	no	no	no	no	no	no	no	yes	yes	yes	yes	no	no	no	no	1	2	0	2	0	5	high
56	F	no	no	yes	no	no	no	no	no	no	yes	0.6	no	1	no	yes	no	no	no	no	no	yes	no	no	no	no	yes	yes	yes	yes	no	no	no	no	1	2	0	2	0	5	high
76	F	no	no	yes	yes	no	no	no	no	no	yes	0.9	no	10.4	no	yes	no	no	no	no	no	yes	no	yes	no	no	yes	yes	yes	yes	no	no	no	no	1	2	0	2	0	5	high
69	F	no	no	yes	no	no	no	no	no	no	yes	19.7	no	1.8	no	yes	no	no	no	no	no	yes	no	yes	no	no	yes	yes	yes	yes	no	no	no	no	1	2	0	2	0	5	high
50	F	no	no	no	yes	no	no	no	no	no	yes	4	no	2.1	no	yes	yes	no	no	no	no	yes	no	yes	no	no	yes	yes	yes	yes	no	no	no	no	1	2	0	2	0	5	high
62	F	no	no	yes	no	no	no	no	no	no	yes	6.2	no	1.6	yes	yes	no	no	no	no	no	yes	no	yes	no	no	yes	yes	yes	yes	no	no	no	no	1	2	0	2	0	5	high
74	F	no	no	yes	no	no	no	no	no	no	yes	3.9	no	1.2	yes	no	no	no	no	no	no	yes	no	yes	no	no	yes	yes	yes	yes	no	no	no	no	1	2	0	2	0	5	high
63	F	no	no	yes	no	no	no	no	no	no	yes	4.89	no		yes	no	no	no	no	no	no	yes	no	yes	no	no	yes	yes	yes	yes	no	no	no	no	1	2	0	2	0	5	high
97	F	no	no	no	no	no	no	no	no	no	yes	1.77	no	2.9	no	yes	no	no	no	yes	no	no	no	no	no	no	yes	yes	yes	yes	no	no	no	no	1	2	0	2	0	5	high
63	F	no	no	yes	no	no	no	no	no	no	yes	0.79	no	1.9	no	no	no	no	no	no	no	yes	no	yes	no	no	yes	yes	yes	yes	no	no	no	no	1	2	0	2	0	5	high
89	F	no	no	no	no	no	no	no	no	no	yes	15.7	no	1.3	yes	no	no	no	no	no	no	no	no	no	no	no	yes	yes	yes	yes	no	no	no	no	1	2	0	2	0	5	high
90	F	no	no	no	no	no	no	no	no	no	yes	2.8	no	2.34	no	yes	yes	no	no	yes	no	no	no	no	no	no	yes	yes	yes	yes	no	no	no	no	1	2	0	2	0	5	high
70	F	no	no	yes	no	no	no	no	no	no	yes	13.7	no	1	no	no	no	no	no	no	no	yes	no	yes	no	no	yes	yes	yes	yes	no	no	no	no	1	2	0	2	0	5	high
89	F	no	no	no	no	no	no	no	no	no	yes	1.55	no	2.6	no	yes	yes	no	no	no	no	no	no	no	no	no	yes	yes	yes	yes	no	no	no	no	1	2	0	2	0	5	high
74	F	no	no	yes	no	no	no	no	no	no	yes	5	no	2.5	no	yes	yes	no	no	yes	no	no	no	no	no	no	yes	yes	yes	yes	yes	yes	no	no	1	2	0	2	0	5	high
59	F	no	no	yes	no	no	no	no	no	no	yes	0.9	no	4	yes	yes	yes	no	no	no	no	no	no	no	no	no	yes	yes	yes	yes	yes	yes	no	no	1	2	0	2	0	5	high
72	F	no	no	yes	no	no	no	no	no	no	yes	1.4	no	1	no	yes	no	no	no	yes	no	no	no	no	no	no	yes	yes	yes	yes	no	no	no	no	1	2	0	2	0	5	high
79	F	no	no	yes	no	no	no	no	no	no	yes	4	no	1.8	yes	no	no	no	yes	yes	no	no	no	no	no	no	yes	yes	yes	yes	no	no	no	no	1	2	0	2	0	5	high
84	F	no	no	yes	no	no	no	no	no	no	yes	15	no		no	no	no	no	no	no	no	yes	no	yes	no	no	no	yes	no	no	no	no	no	no	1	2	0	2	0	5	high
78	F	no	no	yes	yes	no	no	no	no	no	yes	0.7	no	5	no	yes	no	no	no	no	no	no	no	no	no	no	no	yes	no	no	yes	yes	no	no	1	2	0	2	0	5	high
57	F	no	no	yes	no	no	no	no	no	no	yes		no		no	no	no	no	no	no	no	no	no	no	no	no	no	yes	no	no	no	no	no	no	1	2	0	2	0	5	high
33	F	no	no	yes	no	no	no	no	no	no	yes	0.56	no	4	no	no	no	no	no	no	no	no	no	no	no	no	no	yes	no	no	no	no	no	no	1	2	0	2	0	5	high
69	F	no	no	no	yes	no	no	no	no	no	yes	0.5	no	2.2	no	no	no	no	no	no	no	no	no	no	no	no	no	yes	no	no	no	no	no	no	1	2	0	2	0	5	high
80	F	no	no	no	no	no	no	no	no	no	yes	1.8	no	1.6	no	no	no	no	no	no	no	no	no	no	no	no	no	yes	no	no	yes	yes	no	no	1	2	0	2	0	5	high
96	F	no	no	yes	yes	no	no	no	no	no	yes	10.44	no	10	no	no	no	no	no	no	no	yes	no	yes	no	no	no	yes	no	no	no	no	no	no	1	2	0	2	0	5	high
49	F	no	no	yes	no	no	no	no	no	no	yes	0.3	no	2.6	no	no	no	no	no	no	no	no	no	no	no	no	no	yes	yes	no	no	no	no	no	1	2	0	2	0	5	high
65	F	no	no	no	yes	no	no	no	no	no	yes	0.7	no	5	no	no	no	no	no	no	no	no	no	no	no	no	no	yes	yes	no	no	no	no	no	1	2	0	2	0	5	high
55	F	no	no	yes	no	no	no	no	no	no	yes	0.57	no	3	no	no	no	no	no	no	no	no	no	no	no	no	no	yes	yes	no	no	no	no	no	1	2	0	2	0	5	high
85	F	no	yes	no	no	no	no	no	no	no	yes	0.7	no	3.4	no	no	no	no	no	no	no	no	no	no	no	no	no	yes	yes	no	yes	no	yes	no	1	2	0	2	0	5	high
77	F	no	no	no	yes	no	no	no	no	no	yes	0.4	no	10.6	no	yes	no	no	no	no	no	no	no	no	no	no	no	yes	yes	no	yes	yes	no	no	1	2	0	2	0	5	high
78	F	no	no	yes	no	no	R-Y	yes	no	no	yes	0.42	no	4	no	yes	no	no	no	no	no	no	no	no	no	no	yes	yes	yes	yes	no	no	no	no	1	2	0	2	0	5	high
71	F	no	no	yes	no	no	no	no	no	no	yes	1.18	no	2.5	yes	yes	no	yes	no	yes	no	no	no	no	no	no	yes	yes	no	no	no	no	no	no	1	2	0	2	0	5	high
87	F	no	no	yes	no	no	no	no	no	no	yes	0.7	no	3.7	yes	yes	no	yes	no	yes	no	no	no	no	no	no	yes	yes	yes	yes	yes	no	no	yes	1	2	0	2	0	5	high
78	M	no	no	yes	no	yes	no	no	no	no	yes	0.9	no	12.3	no	no	no	no	no	no	no	no	no	no	no	no	yes	yes	no	no	no	no	no	no	0	2	0	2	2	6	high
71	M	no	no	yes	no	yes	no	no	no	no	yes	0.55	no	6.1	no	no	no	no	no	no	no	yes	no	yes	no	no	no	yes	no	no	no	no	no	no	0	2	0	2	2	6	high
78	M	no	no	yes	no	yes	no	no	no	no	yes	0.87	no	13.1	no	yes	no	no	no	yes	no	no	no	no	no	no	no	yes	no	no	no	no	no	no	0	2	0	2	2	6	high
64	F	no	no	no	no	yes	no	no	no	no	yes	0.3	no	1.5	no	no	no	no	no	no	no	no	no	no	no	no	no	yes	no	no	yes	yes	no	no	1	2	0	2	2	7	high
79	F	no	no	yes	no	yes	no	no	no	no	yes	0.6	no	5.1	no	no	no	no	no	no	no	no	no	no	no	no	no	yes	yes	no	no	no	no	no	1	2	0	2	2	7	high
72	F	no	no	yes	no	yes	no	no	no	no	yes	0.75	no	3	no	no	no	no	no	no	no	no	no	no	no	no	no	yes	yes	no	no	no	no	no	1	2	0	2	2	7	high
77	M	no	no	yes	no	no	no	no	no	no	no	0.6			yes	no	no	no	no	no	no	yes	no	yes	no	no	no	no	no	no	no	no	no	no
78	M	no	no	yes	no	no	no	no	no	no	no	6.7			no	no	no	no	no	no	no	yes	no	yes	no	no	no	no	no	no	no	no	no	no
64	M	no	no	yes	no	no	no	no	no	no	no	1.3			no	no	no	no	no	yes	no	yes	no	yes	no	no	no	no	no	no	no	no	no	no
81	M	no	no	yes	no	no	no	no	no	no	no	1.3			no	no	no	no	no	no	no	yes	no	yes	no	no	no	no	no	no	no	no	no	no
58	M	no	no	yes	yes	no	no	no	no	no	no	1.9			no	no	no	no	no	no	no	yes	no	no	yes	yes	no	no	no	no	no	no	no	no
22	M	no	no	yes	no	no	no	no	no	no	no	0.8			no	no	no	no	no	no	no	yes	no	yes	no	no	no	no	no	no	no	no	no	no
57	M	no	no	yes	yes	no	no	no	no	no	no	3			no	no	no	no	no	no	no	yes	no	no	yes	no	no	no	no	no	no	no	no	no
64	M	no	no	yes	no	no	no	no	no	no	no	17.2			no	no	no	no	no	yes	no	no	no	no	no	no	no	no	no	no	no	no	no	no
80	M	no	no	yes	no	no	no	no	no	no	no	5.9			no	no	no	no	no	no	no	yes	no	yes	no	no	no	no	no	no	no	no	no	no
61	M	no	no	yes	no	no	no	no	no	no	no	6.1			no	no	no	no	no	no	no	yes	no	yes	no	no	no	no	no	no	no	no	no	no
68	M	no	no	yes	no	no	no	no	no	no	no	1.3			no	no	no	no	no	no	no	yes	no	yes	no	no	no	no	no	no	no	no	no	no
77	M	no	no	yes	no	no	no	no	no	no	no	1.1			no	no	no	no	no	no	no	yes	no	yes	no	no	no	no	no	no	no	no	no	no
70	M	no	no	yes	no	no	no	no	no	no	no	0.6			no	no	no	no	no	yes	no	yes	no	yes	no	no	no	no	no	no	no	no	no	no
66	M	no	no	no	no	no	no	no	no	no	no	1.3			no	no	no	no	no	no	no	yes	yes	yes	no	no	no	no	no	no	no	no	no	no
74	F	no	no	no	yes	no	no	no	no	no	no	0.9			no	no	no	no	no	no	no	yes	no	no	yes	yes	no	no	no	no	no	no	no	no
66	F	no	no	yes	no	no	no	no	no	no	no	4			yes	yes	no	no	no	no	no	yes	no	yes	no	no	no	no	no	no	no	no	no	no
76	F	no	no	yes	yes	no	no	no	no	no	no	0.4			no	no	no	no	no	no	no	yes	no	no	yes	no	no	no	no	no	no	no	no	no
79	F	no	no	yes	no	no	no	no	no	no	no	0.4			no	no	no	no	no	no	no	no	no	no	no	no	no	no	no	no	no	no	no	no
94	F	no	no	yes	no	no	no	no	no	no	no	1.2			yes	no	no	no	no	no	no	yes	no	yes	no	no	no	no	no	no	no	no	no	no
83	M	no	no	yes	no	no	no	no	no	no	no	1.2			no	no	no	no	no	no	no	yes	no	yes	no	no	yes	yes	no	no	no	no	no	no
85	F	no	no	no	no	no	no	no	no	no	no	0.4			yes	yes	no	no	no	yes	no	no	no	no	no	no	yes	yes	no	no	no	no	no	no
70	F	no	no	yes	no	no	no	no	no	no	no	1			yes	yes	no	no	yes	yes	no	no	no	no	no	no	no	no	no	no	no	no	no	no
68	F	no	no	yes	no	no	no	no	no	no	no	0.9			yes	no	no	no	yes	yes	no	yes	no	yes	no	no	no	no	no	no	no	no	no	no
75	M	no	no	yes	no	no	no	no	no	no	no	0.7			no	no	no	no	no	no	yes	yes	no	yes	no	no	yes	yes	yes	yes	no	no	no	no
72	M	no	no	no	no	no	no	no	no	no	no	0.5			no	no	yes	no	no	no	no	no	no	no	no	no	no	yes	no	no	no	no	no	no
80	F	no	no	yes	no	no	no	no	no	no	no				no	no	no	no	no	no	no	no	no	yes	no	no	no	yes	yes	no	no	no	no	no
71	M	no	no	yes	no	no	B-II	yes	no	no	no	1.1			no	no	no	no	no	no	no	yes	no	no	yes	no	no	no	no	no	no	no	no	no
92	M	yes	no	no	yes	no	R-Y	yes	no	no	no	22.5			no	yes	no	no	no	no	no	yes	yes	no	yes	no	no	no	no	no	no	no	no	no
76	F	no	no	yes	no	no	no	no	no	no	no	0.6			no	yes	no	yes	no	yes	no	yes	no	no	no	no	no	no	no	no	no	no	no	no
64	M	no	no	yes	no	no	no	no	no	no	yes	2.8			no	yes	no	no	no	yes	no	no	no	no	no	no	no	no	no	no	no	no	no	no
60	F	no	no	yes	no	no	no	no	no	no	yes				yes	yes	no	no	no	yes	no	no	no	no	no	no	no	no	no	no	no	no	no	no
65	M	no	no	no	no	no	R-Y	yes	no	no	yes	0.5			no	yes	no	yes	no	yes	no	no	no	no	no	no	yes	yes	no	no	no	no	no	no
